# Supplementary material
Source: PubMed Central journal article supplement (PMC6953484)
Supplement: NIHMS1065485-supplement-SI.pdf [file NIHMS1065485-supplement-SI.pdf]

**Supporting Information for:**

**The Roles of Iron Complexes in Catalytic Radical Alkene Cross-Coupling:  
A Computational and Mechanistic Study**

Dongyoung Kim, S. M. Wahidur Rahaman, Brandon Q. Mercado, Rinaldo Poli,\* and Patrick L. Holland\*

## Contents

|                                                                                                                             |           |
|-----------------------------------------------------------------------------------------------------------------------------|-----------|
| <b>1. General considerations and experimental data.....</b>                                                                 | <b>4</b>  |
| 1.A General considerations.....                                                                                             | 4         |
| 1.B Test for reversible hydrogen atom transfer from Fe-H to alkene.....                                                     | 5         |
| 1.C Fe <sup>3+/2+</sup> reduction/oxidation of Fe(acac) <sub>2</sub> in EtOH by cyclic voltammetry.....                     | 9         |
| 1.D Kinetic isotope effect (KIE) for olefin coupling in EtOH and EtOD.....                                                  | 11        |
| 1.E Product isotope effect (PIE) determination for olefin coupling in 1:1 EtOH/EtOD solution.....                           | 13        |
| 1.F Reaction between Fe(acac) <sub>2</sub> and 0.5 equiv AIBN with 20 equiv EtOH.....                                       | 15        |
| 1.G Reaction between Fe(acac) <sub>2</sub> and 0.5 equiv AIBN with 20 equiv EtOD.....                                       | 16        |
| 1.H Reaction between Fe(acac) <sub>2</sub> and 0.5 equiv AIBN with 20 equiv CD <sub>3</sub> CD <sub>2</sub> OD.....         | 17        |
| 1.I Reaction between AIBN and 20 equiv EtOH.....                                                                            | 18        |
| 1.J Mössbauer spectroscopic characterization of Fe(acac) <sub>2</sub> .....                                                 | 19        |
| 1.K Monitoring reaction between Fe(acac) <sub>2</sub> (EtOH) <sub>2</sub> and 0.5 equiv AIBN by Mössbauer spectroscopy..... | 20        |
| 1.L Monitoring reaction between Fe(acac) <sub>2</sub> (EtOH) <sub>2</sub> and 2.0 equiv AIBN by Mössbauer spectroscopy..... | 21        |
| 1.L Determination of overall barrier for the catalytic reaction.....                                                        | 24        |
| 1.M Determination of association constant between Fe(acac) <sub>2</sub> and EtOH.....                                       | 25        |
| 1.N Monitoring product distribution and starting material consumption of olefin coupling.....                               | 27        |
| 1.O Reaction between AIBN and Et <sub>3</sub> NHBF <sub>4</sub> .....                                                       | 28        |
| 1.P Reaction between Fe(acac) <sub>2</sub> and 0.5 equiv AIBN with 1 equiv Et <sub>3</sub> NHBF <sub>4</sub> .....          | 29        |
| 1.Q Reaction between Fe(acac) <sub>2</sub> and 0.5 equiv AIBN with 20 equiv Et <sub>3</sub> NHBF <sub>4</sub> .....         | 30        |
| 1.R Competition reaction between PhSiD <sub>3</sub> and PhSi(O <sup>i</sup> Pr)H <sub>2</sub> .....                         | 31        |
| <b>2. Computational Procedures and Data.....</b>                                                                            | <b>32</b> |
| 2.A (acac) <sub>2</sub> Fe <sup>III</sup> methoxides.....                                                                   | 33        |
| 2.B FeH(acac) <sub>2</sub> (monomers vs. dimers).....                                                                       | 38        |
| 2.C EtOH adducts of FeH(acac) <sub>2</sub> .....                                                                            | 42        |
| 2.D Silane activation of Fe(OMe)(acac) <sub>2</sub> .....                                                                   | 44        |
| 2.E Comparison of different silanes as activators.....                                                                      | 48        |
| 2.F H atom transfer from FeH(acac) <sub>2</sub> to isobutene.....                                                           | 50        |
| 2.G Fe(acac) <sub>2</sub> and EtOH adducts.....                                                                             | 52        |
| 2.H <i>t</i> Bu <sup>•</sup> trapping by Fe(acac) <sub>2</sub> .....                                                        | 54        |
| 2.I <i>t</i> Bu <sup>•</sup> addition to methyl acrylate.....                                                               | 56        |
| 2.J Me <sup>•</sup> CH(COOMe) trapping by Fe(acac) <sub>2</sub> .....                                                       | 57        |

|                                                                                                     |    |
|-----------------------------------------------------------------------------------------------------|----|
| 2.K Testing of other functionals.....                                                               | 59 |
| 2.L Redox properties and electron transfer from Fe(acac) <sub>2</sub> to the acrylate radical ..... | 64 |
| 2.M Concerted proton-electron transfers to the acrylate and <i>t</i> Bu radicals .....              | 67 |
| 2.N Acrylate radical homopropagation.....                                                           | 70 |
| 2.O MeOH adducts of (acac) <sub>2</sub> Fe <sup>III</sup> (CHMeCOOMe) .....                         | 71 |
| 2.P Intramolecular acrylate protonation (Part 1: to the C-bound enolate) .....                      | 74 |
| 2.Q Intramolecular acrylate protonation (Part 2: to the O-bound enolate).....                       | 81 |
| 2.R Bond strength calculations (all energies are in hartrees) .....                                 | 87 |
| 2.S Estimation of the expected steady-state concentration of the hydride complex .....              | 88 |

## 1. General considerations and experimental data

**1.A General considerations.** Unless otherwise noted, all manipulations were performed under an N<sub>2</sub> atmosphere in an M. Braun glovebox maintained at or below 1 ppm of O<sub>2</sub>. Glassware was dried at 150 °C at least 12 hours before use and Celite was dried at 200 °C under vacuum. Solvents were dried by passage through activated alumina and Q5 columns from Glass Contour Co. with the exception of THF, which was distilled under Ar from potassium benzophenone ketyl. All solvents were stored over activated 4 Å molecular sieves. Benzene-*d*<sub>6</sub> was dried over sodium benzophenone ketyl and stored over activated alumina and filtered before use. PhSiD<sub>3</sub>, **1**, and Fe(acac)<sub>2</sub> were prepared according to published methods.<sup>1-2</sup> Benzyl acrylate was purchased from Alfa Aesar, degassed with three freeze-pump-thaw cycles, and stored with 4 Å molecular sieves in the dark under an N<sub>2</sub> atmosphere. Iron(III) acetylacetonate, Fe(acac)<sub>3</sub>, was purchased from Strem Chemicals. Azobisisobutyronitrile, AIBN, was purified by recrystallization from methanol before use and stored at -38 °C under dark. Absolute ethanol was purchased from Decon labs Inc. Ethanol-OD and ethanol-*d*<sub>6</sub> were purchased from Sigma-Aldrich. <sup>1</sup>H NMR and <sup>13</sup>C NMR spectroscopic data were recorded on a Bruker Avance 400 spectrometer (400 MHz). All resonances in the <sup>1</sup>H NMR spectra are referenced to residual C<sub>6</sub>D<sub>5</sub>H (δ 7.16 ppm). Gas chromatography (GC) was performed on a Shimadzu GC-2010 Plus chromatograph equipped with a flame ionization detector and a Shimadzu SHRXI-5MS column (30 m, 250 μm inner diameter, 0.25 μm average thickness). Gas chromatography-Mass spectrometry (GC-MS) was performed using Agilent 5973 inert GC/MS system using electron impact (EI) ionization after analytes passed through HP-5MS column (30 m, 250 μm inner diameter, 0.25 μm average thickness). Mössbauer samples were frozen in Delrin sample cups and recorded on a SEECO Mössbauer spectrometer with alternating constant acceleration; isomer shifts are relative to α-iron metal at 298 K. The sample temperature was maintained at 80 K in a Janis Research Company Inc. cryostat. The zero-field spectra were simulated using Lorentzian doublets using WMoss (SeeCo).

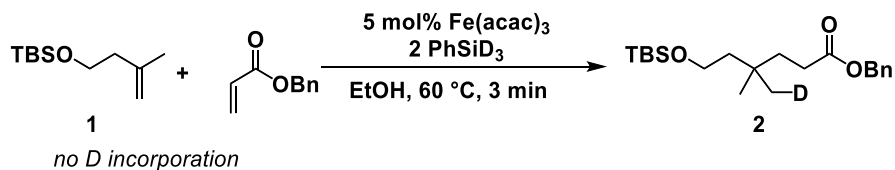

**1.B Test for reversible hydrogen atom transfer from Fe-H to alkene.** In an N<sub>2</sub>-filled glove box, compound **1** (40 mg, 0.20 mmol, 1.0 equiv), benzyl acrylate (30  $\mu$ L, 0.20 mmol, 1.0 equiv), PhSiD<sub>3</sub> (68 mg of 65% solution in diethyl ether, 0.40 mmol, 2.0 equiv) and Fe(acac)<sub>3</sub> (3.5 mg, 0.010 mmol, 0.050 equiv) were added to a Schlenk flask with 1.0 mL EtOH. The resulting red solution was stirred at 60  $^\circ$ C for 3 min before removing the solvents under vacuum. The resulting residue was then filtered through a plug of silica (3.0 cm) in a pipette, eluting with 4.0 mL of hexanes:EtOAc (4:1). After removing the solvents from the filtrate, the crude reaction mixture was dissolved in CDCl<sub>3</sub> and analyzed using <sup>1</sup>H and <sup>13</sup>C NMR spectroscopy (**Figure S1 and S2**). A GCMS sample was prepared by dissolving the crude mixture in 2.0 mL of EtOAc (**Figure S3 – S5**).

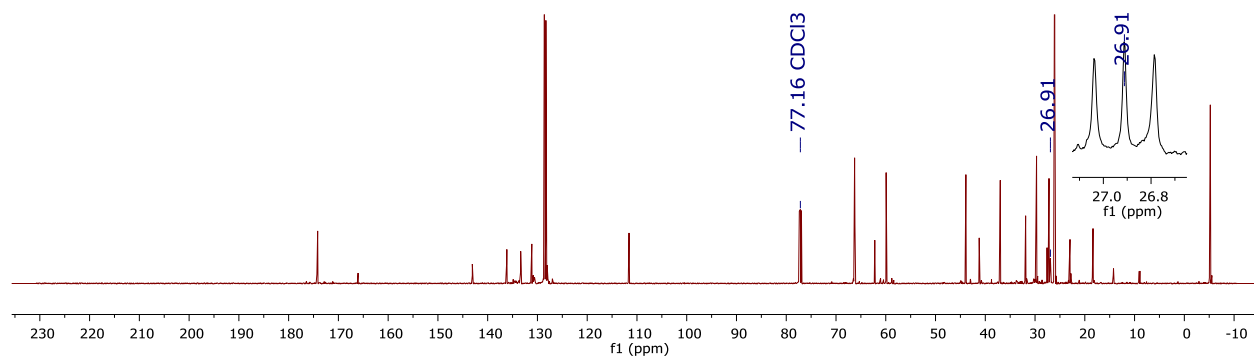

**Figure S1.** <sup>13</sup>C{<sup>1</sup>H} NMR spectrum of the reaction mixture in CDCl<sub>3</sub> after filtering through a plug of silica.

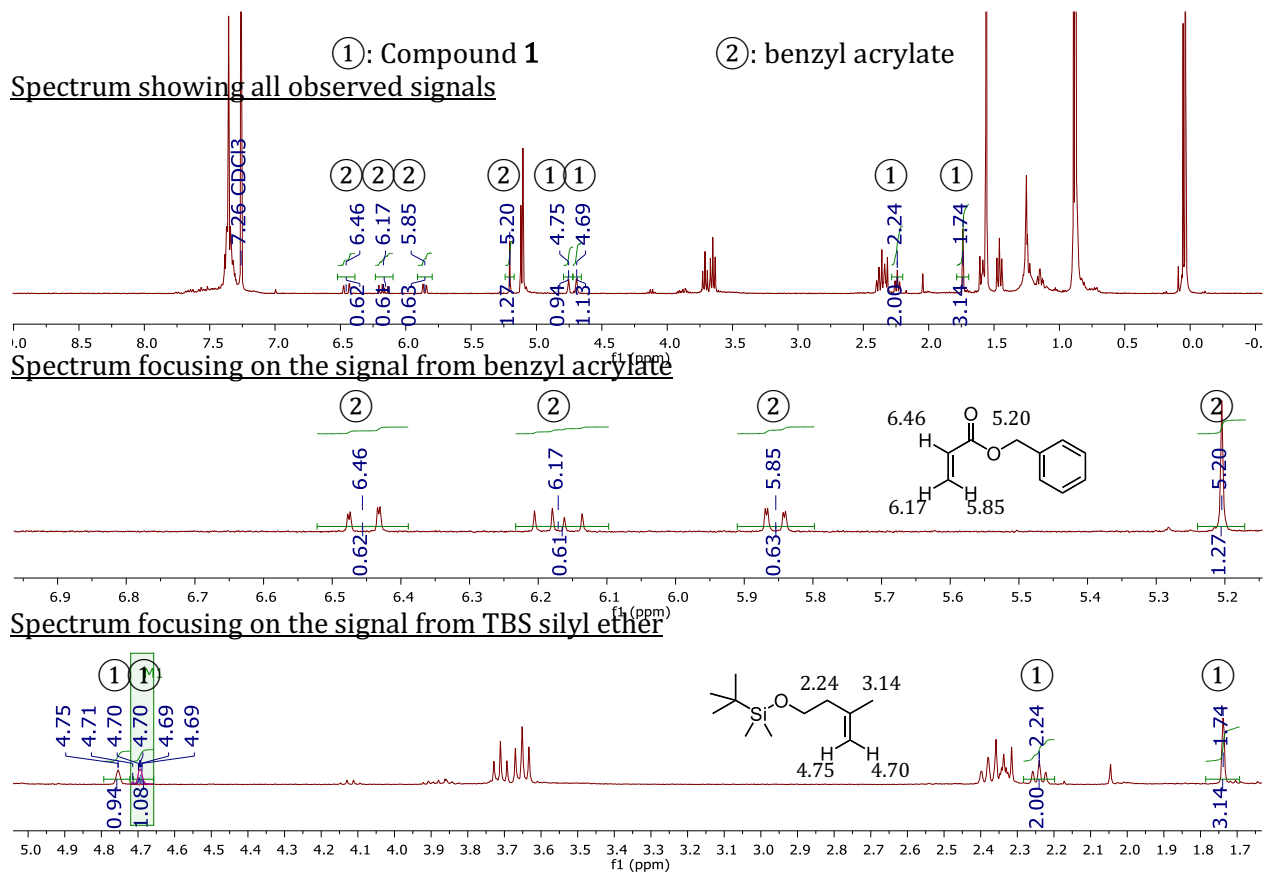

**Figure S2.**  $^1\text{H}$  NMR spectrum of the reaction mixture in  $\text{CDCl}_3$  after filtering through a plug of silica.

Figure shows integrations and chemical shifts from starting materials.

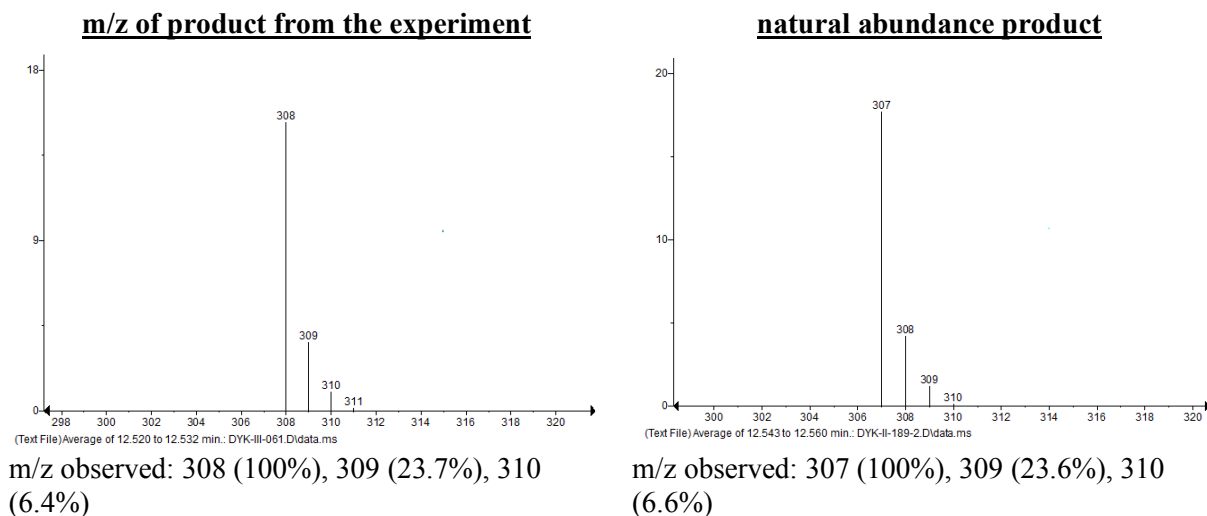

**Figure S3.** Mass spectra of the products obtained from experiments in EtOD (left) and EtOH (right). The molecular ion of the product,  $C_{21}H_{36}O_3Si^+$ , was not observed; rather, the observed  $m/z$  is consistent with fragmentation and loss of the tBu group to form  $C_{17}H_{27}O_3Si^+$ .

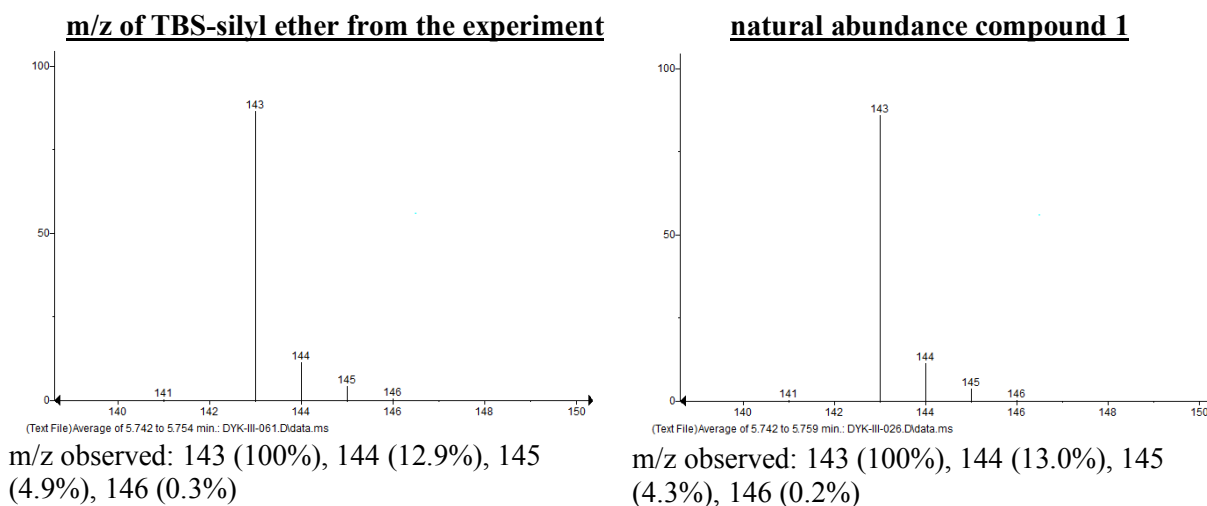

**Figure S4.** Mass spectra of the donor olefin (compound **1**). (Left) Material recovered from reaction in EtOD. (Right) Independently prepared material. The molecular ion of the product,  $C_{11}H_{24}OSi^+$ , was not observed; rather, the observed  $m/z$  is consistent with fragmentation and loss of the tBu group to form  $C_7H_{15}OSi^+$ .

**m/z of benzyl acrylate from the experiment**

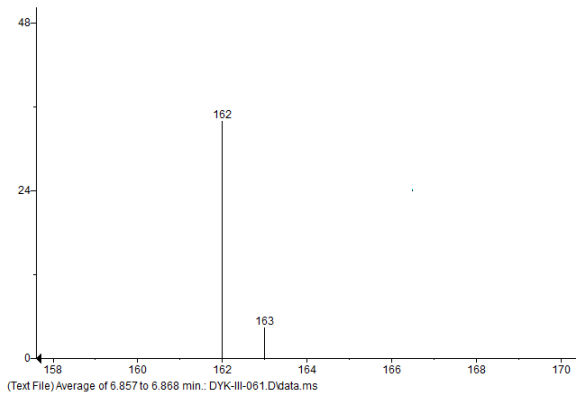

m/z observed: 162 (100%), 163 (12.7%)

**natural abundance benzyl acrylate**

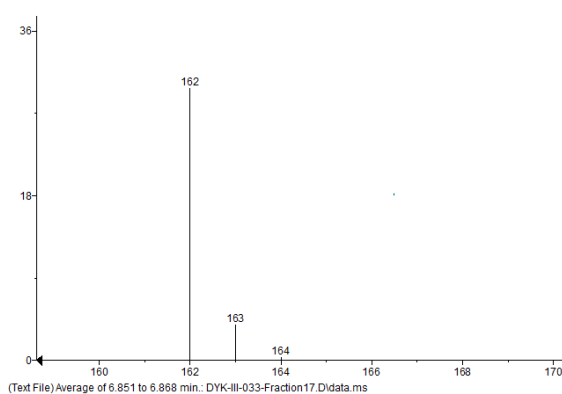

m/z observed: 162 (100%), 163 (13.0%)

**Figure S5.** Mass spectra of the acceptor olefin (benzyl acrylate). (Left) Material recovered from reaction in EtOD. (Right) Commercially obtained benzyl acrylate.



**1.C Fe<sup>3+/2+</sup> reduction/oxidation of Fe(acac)<sub>2</sub> in EtOH by cyclic voltammetry.** In an N<sub>2</sub>-filled glove box, tetrabutylammonium tetrafluoroborate, TBABF<sub>4</sub> (170 mg, 0.50 mmol) was dissolved in 5.0 mL of EtOH to give a 0.10 M TBABF<sub>4</sub> solution. After scanning the solvent window to ensure the absence of any possible impurities, Fe(acac)<sub>2</sub> (3.8 mg, 0.015 mmol) was added to the above solution to give a 3.0 mM Fe(acac)<sub>2</sub> solution for cyclic voltammetry.

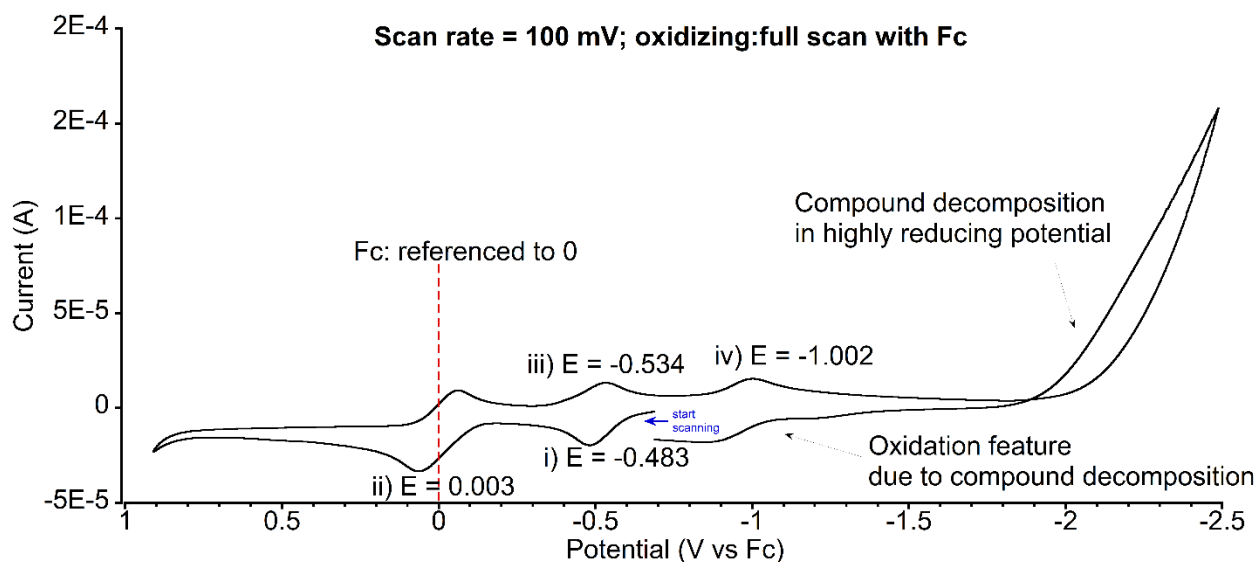

**Figure S6.** Cyclic voltammogram of Fe(acac)<sub>2</sub> showing all observed oxidation and reduction events.

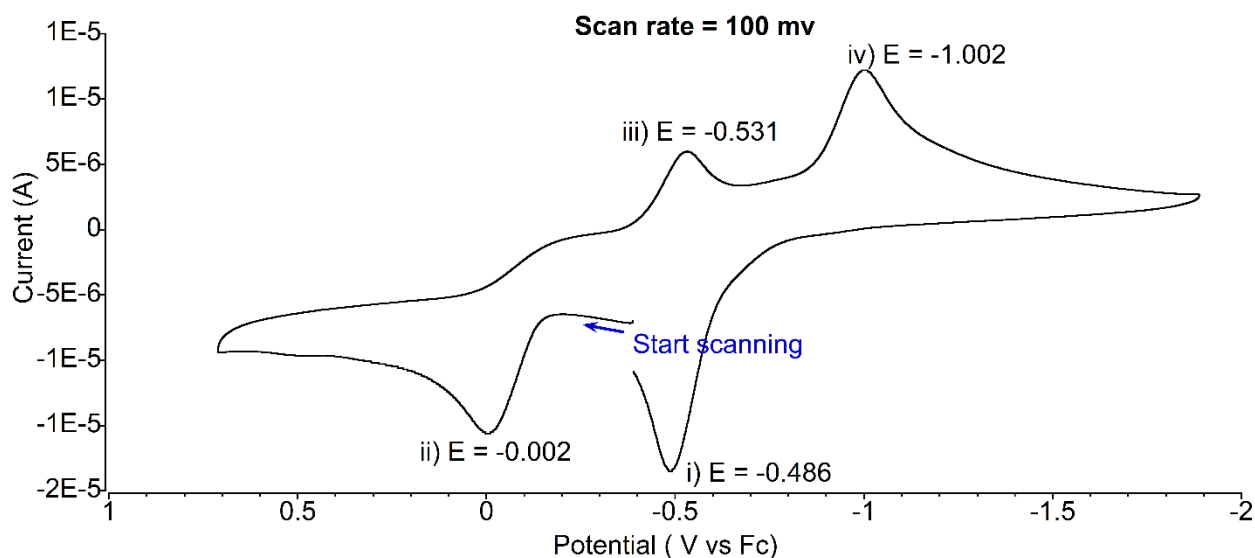

**Figure S7.** Cyclic voltammogram of Fe(acac)<sub>2</sub> showing all observed oxidation and reduction events within the window where no compound decomposition is observed.

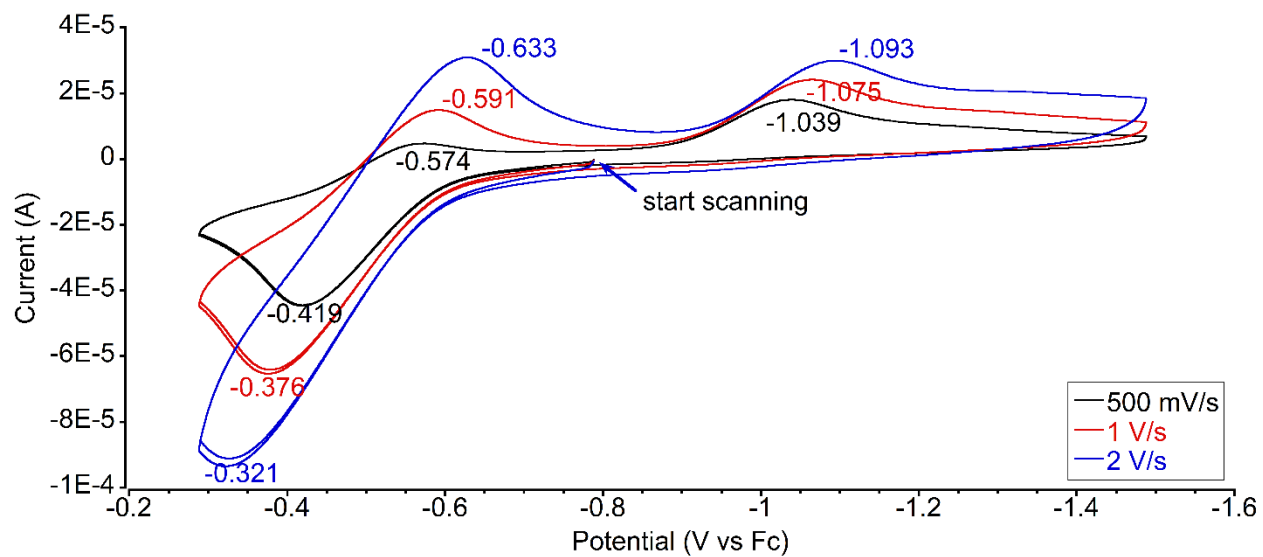

**Figure S8.** Cyclic voltammogram of Fe(acac)<sub>2</sub> in EtOH at various scan rates.

**1.D Kinetic isotope effect (KIE) for olefin coupling in EtOH and EtOD.** In a N<sub>2</sub>-filled glove box, compound **1** (120 mg, 0.60 mmol, 1.0 equiv), benzyl acrylate (140  $\mu$ L, 0.90 mmol, 1.5 equiv), Fe(acac)<sub>3</sub> (21 mg, 0.060 mmol, 0.10 equiv) and 1,3,5-trimethoxybenzene (100 mg, 0.60 mmol, 1.0 equiv) were added to a Schlenk flask with 3 mL of EtOH. The flask was then taken out of the glovebox and stirred at room temperature for 1 minute to make a homogenous reaction solution. Under a flow of N<sub>2</sub>, PhSiH<sub>3</sub> (110  $\mu$ L, 0.90 mmol, 1.5 equiv) was injected into the solution, and the reaction was heated to 40 °C in an oil bath. The reaction was monitored by taking aliquots of the reaction mixture at 0, 1, 2, 3, 4, 5, 6, 7, 8, 9, 10, 15, 20, 25, 30, 35, 40, 45, 50, 55 and 60 min and immediately filtering each reaction aliquot through a silica plug with EtOAc. The product formation at each time point was analyzed by gas chromatography. An analogous reaction in EtOD used the same amounts. These parallel experiments were analyzed using the method of initial rates.

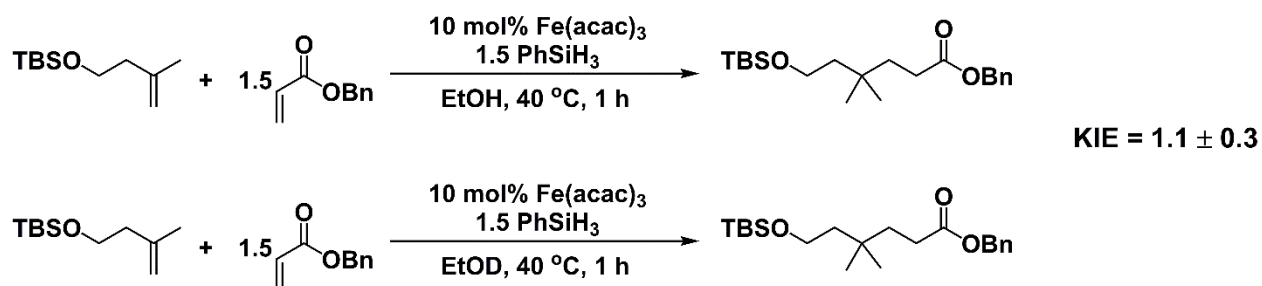

**Table S1.** KIE experiment in EtOH and EtOD

| Run                            | Rate in EtOH         | Rate in EtOD         |
|--------------------------------|----------------------|----------------------|
| 1                              | $7.2 \times 10^{-5}$ | $7.3 \times 10^{-5}$ |
| 2                              | $6.2 \times 10^{-5}$ | $6.3 \times 10^{-5}$ |
| 3                              | $6.1 \times 10^{-5}$ | $5.0 \times 10^{-5}$ |
| <b>Overall KIE = 1.1 ± 0.3</b> |                      |                      |

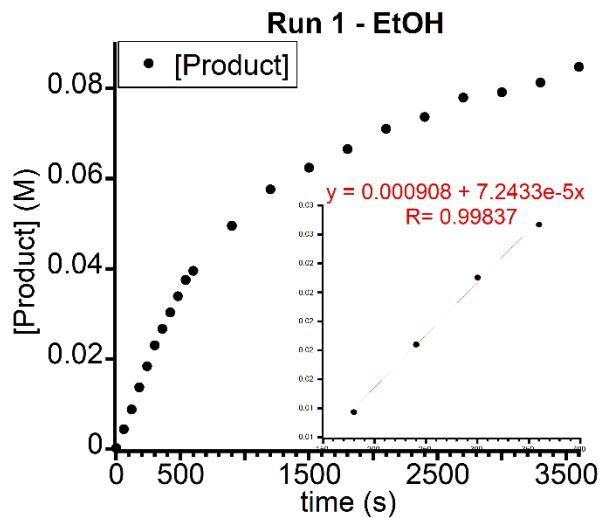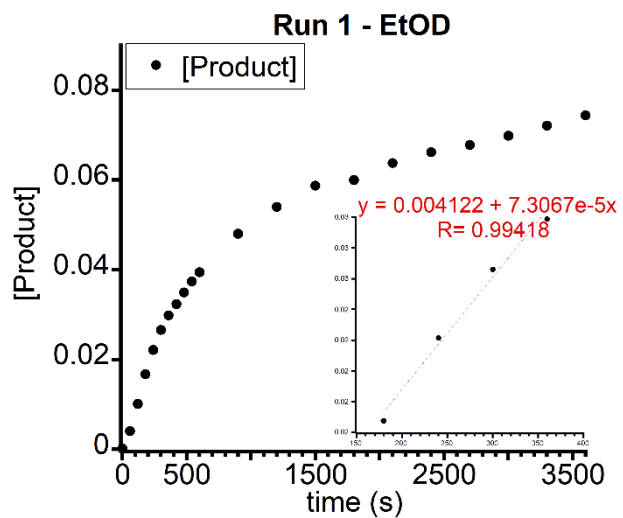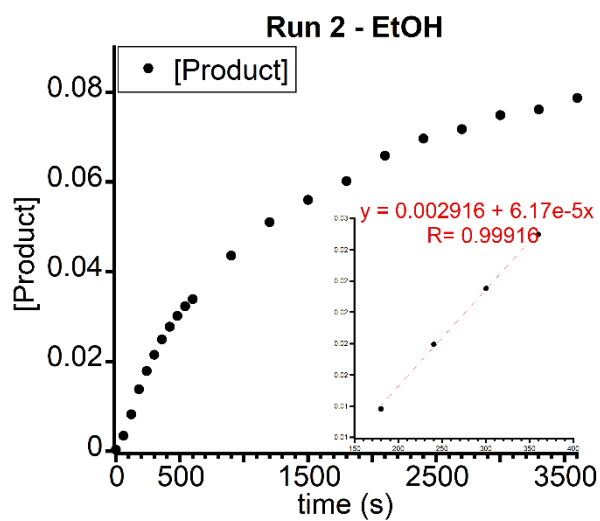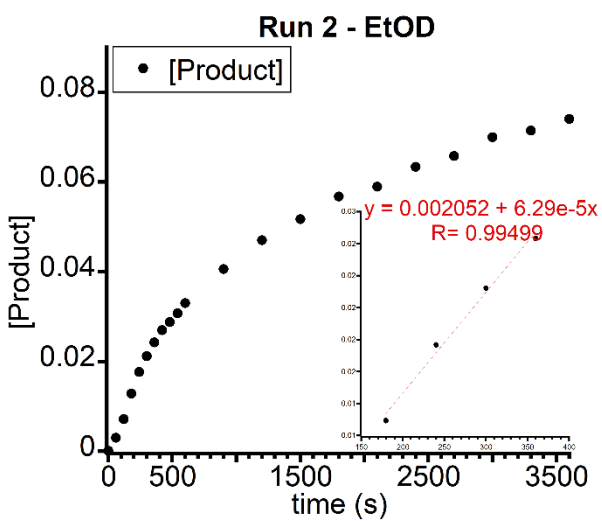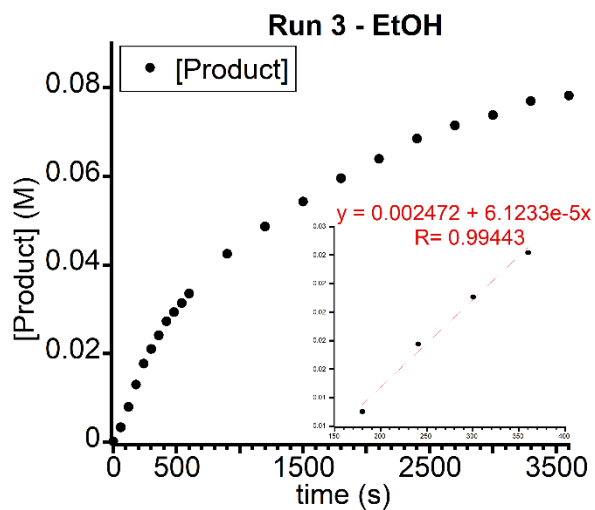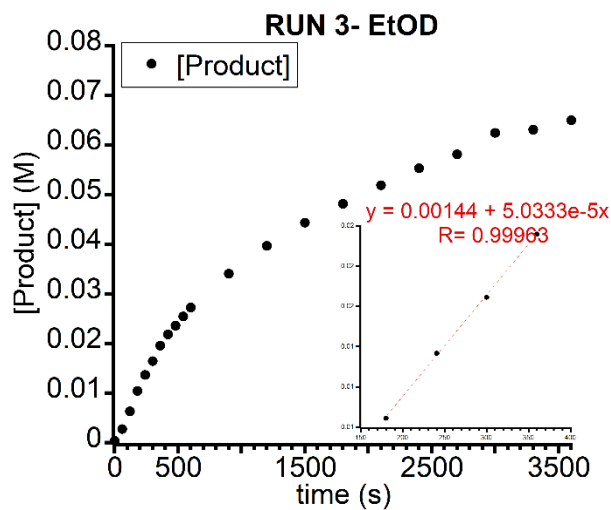

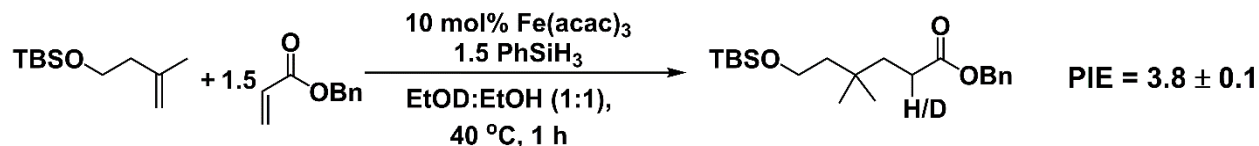

**1.E Product isotope effect (PIE) determination for olefin coupling in 1:1 EtOH/EtOD solution.** To minimize error in this experiment, a stock solution was prepared in EtOH containing compound **1** (0.40 M), benzyl acrylate (0.60 M) and Fe(acac)<sub>3</sub> (0.040 M). Separately, a second stock solution was prepared containing 0.60 M PhSiH<sub>3</sub> in EtOD. In a N<sub>2</sub> filled glove box, a 4.0 mL vial was charged with a stir bar and 0.50 mL of each stock solution. The resulting mixture was then stirred at 40 °C for 1 h. The ratio of H/D incorporation in the cross-coupling product was determined by mass spectrometry (**Figure S9 – S11**). The molecular ion of the product, C<sub>21</sub>H<sub>36</sub>O<sub>3</sub>Si<sup>+</sup>, was not observed; rather, the observed m/z is consistent with fragmentation and loss of the tBu group to form C<sub>17</sub>H<sub>27</sub>O<sub>3</sub>Si<sup>+</sup>. The experiment was repeated three times.

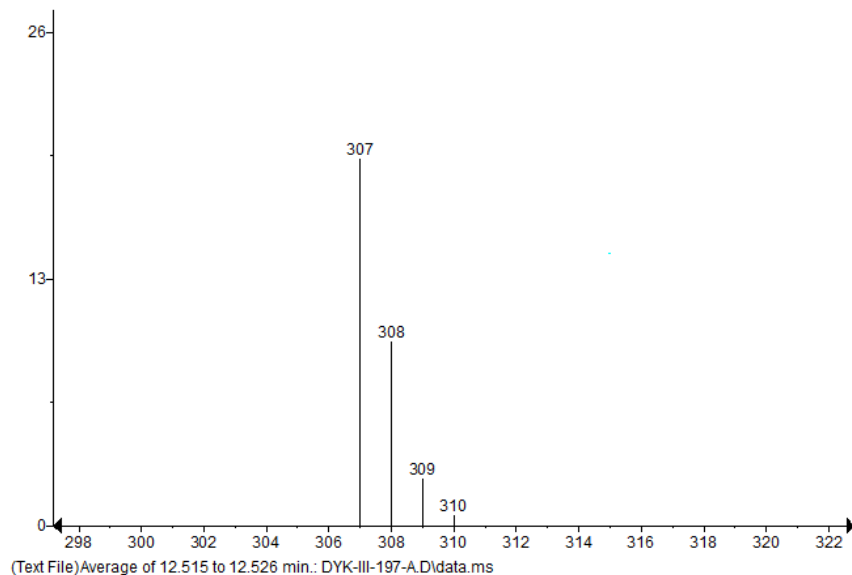

**Figure S9.** Mass spectrum of H/D product mixture from the reaction. Observed peaks correspond to loss of the tBu group to form C<sub>17</sub>H<sub>27</sub>O<sub>3</sub>Si<sup>+</sup> at m/z 307 (100%), 308 (49.8%), 309 (12.8%) and 310 (2.5%).

From these, the ratio of H/D product was calculated to be 3.9:1 (H:D).

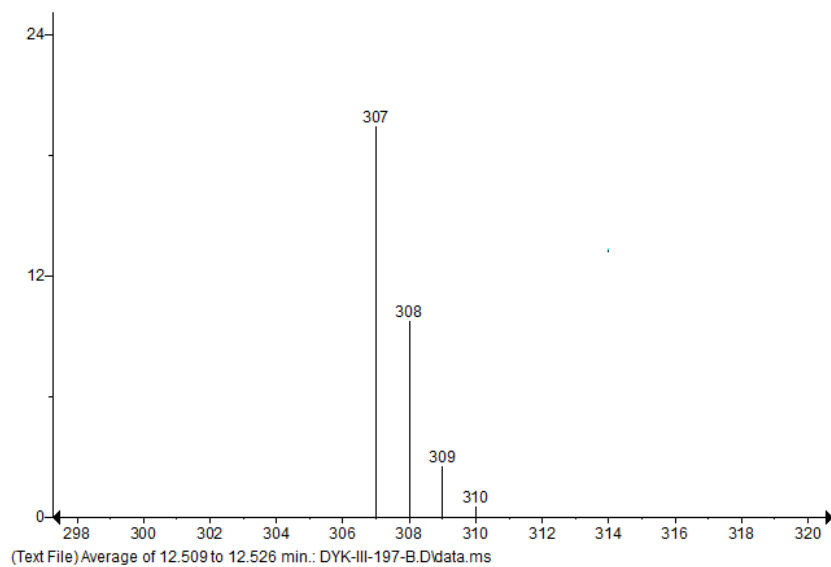

**Figure S10.** Mass spectrum of H/D product mixture from the reaction. Observed peaks correspond to loss of the tBu group to form  $C_{17}H_{27}O_3Si^+$  at m/z 307 (100%), 308 (50.0%), 309 (12.9%) and 310 (2.5%).

From these, the ratio of H/D product was calculated to be 3.9:1 (H:D).

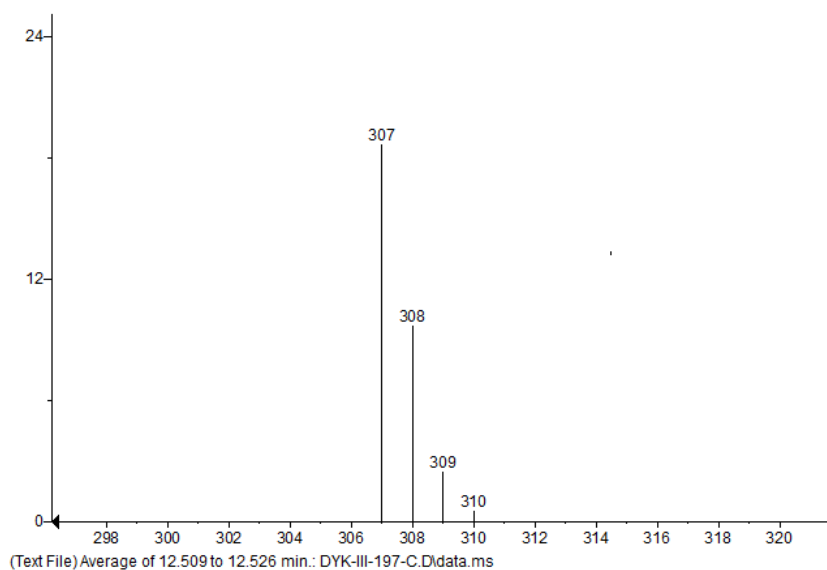

**Figure S11.** Mass spectrum of H/D product mixture from the reaction. Observed peaks correspond to loss of the tBu group to form  $C_{17}H_{27}O_3Si^+$  at m/z 307 (100%), 308 (51.8%), 309 (13.0%) and 310 (2.6%).

From these, the ratio of H/D product was calculated to be 3.7:1 (H:D).

**1.F Reaction between Fe(acac)<sub>2</sub> and 0.5 equiv AIBN with 20 equiv EtOH.** In an N<sub>2</sub>-filled glovebox, Fe(acac)<sub>2</sub> (10 mg, 0.040 mmol, 1.0 equiv) and EtOH (48 μL, 0.80 mmol, 20 equiv) were mixed in 0.9 mL of CD<sub>3</sub>CN. This resulting solution was then transferred to a J. Young tube containing azobisisobutyronitrile, AIBN (0.10 mL of 0.20 M solution in CD<sub>3</sub>CN, 0.020 mmol, 0.50 equiv). After heating the J. Young tube at 80 °C for 2 h, all volatile materials were vacuum transferred to another J. Young tube containing 1,3,5-trimethoxybenzene (0.10 mL of 0.40 M solution in CD<sub>3</sub>CN, 0.040 mmol, 1.0 equiv) as an internal standard. The amount of isobutyronitrile was determined by <sup>1</sup>H NMR spectroscopy (**Figure S12**).

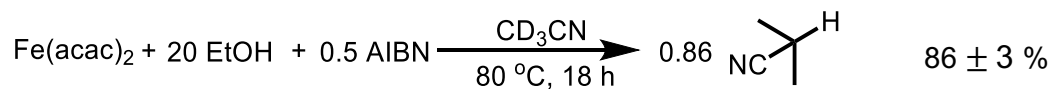

①: isobutyronitrile

②: ethanol

③: 1,3,5 trimethoxy benzene

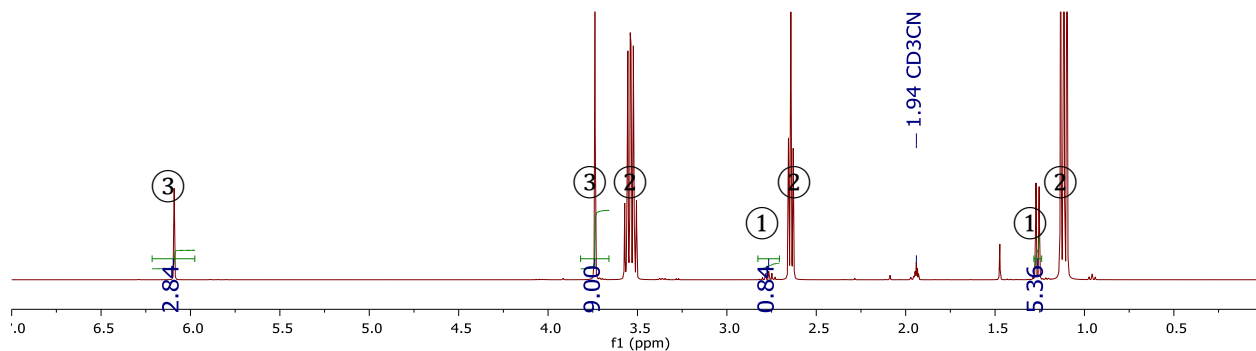

**Figure S12.** <sup>1</sup>H NMR of vacuum transferred reaction solution containing isobutyronitrile and ethanol. Integrations of α and β hydrogens to nitrile group of isobutyronitrile respect to the integrations of 1,3,5-trimethoxybenzene were used to quantify the formation of isobutyronitrile.

**1.G Reaction between Fe(acac)<sub>2</sub> and 0.5 equiv AIBN with 20 equiv EtOD.** In an N<sub>2</sub>-filled glovebox, Fe(acac)<sub>2</sub> (0.80 mL of 0.050 M solution in CD<sub>3</sub>CN, 0.040 mmol, 1.0 equiv) and EtOD (48 μL, 0.80 mmol, 20 equiv) were mixed. The orange solution was then transferred to a J. Young tube containing azobisisobutyronitrile, AIBN, (0.20 mL of 0.10 M solution in CD<sub>3</sub>CN, 0.020 mmol, 0.50 equiv). After heating the J. Young tube at 80 °C for 2 h, all volatile materials were vacuum transferred to another J. Young tube containing 1,3,5-trimethoxybenzene (0.10 mL of 0.40 M solution in CD<sub>3</sub>CN, 0.040 mmol, 1.0 equiv) as an internal standard. The deuteration of isobutyronitrile was determined by <sup>1</sup>H NMR spectroscopy (**Figure S13**).

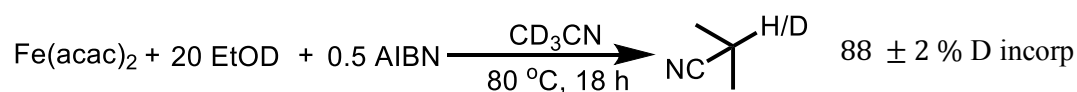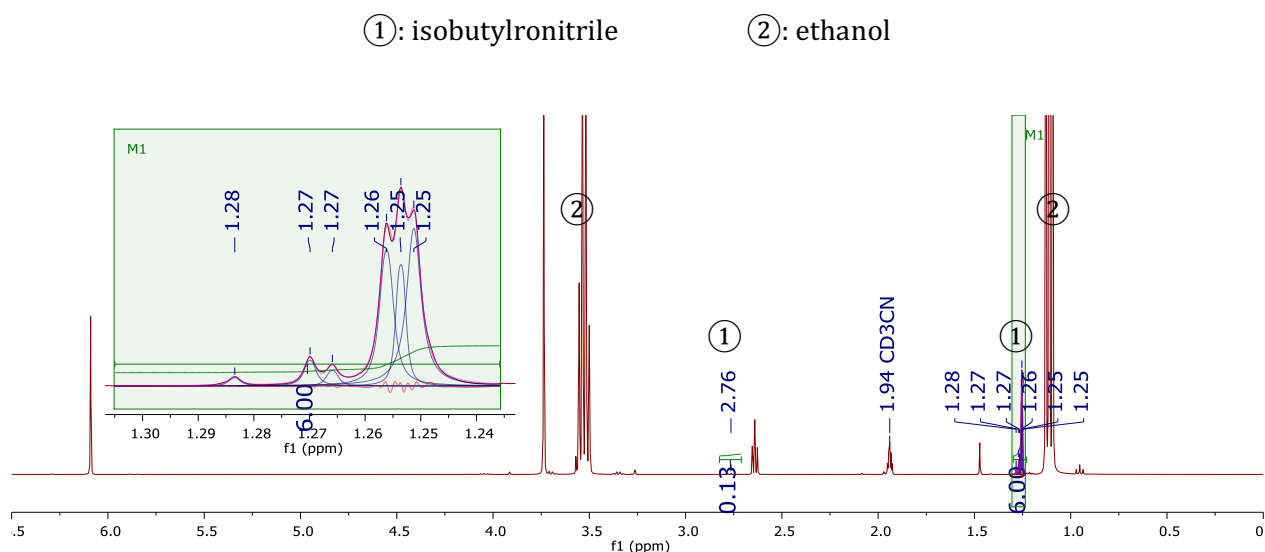

**Figure S13.** <sup>1</sup>H NMR of vacuum transferred reaction solution containing isobutyronitrile and ethanol.

Deuterium incorporation to the product was examined by the change in the splitting pattern of hydrogens β to the nitrile group of isobutyronitrile and the decrease in signal intensity from the hydrogen α to the nitrile group of isobutyronitrile.



**1.H Reaction between Fe(acac)<sub>2</sub> and 0.5 equiv AIBN with 20 equiv CD<sub>3</sub>CD<sub>2</sub>OD.** In an N<sub>2</sub>-filled glovebox, Fe(acac)<sub>2</sub> (0.80 mL of 0.050 M solution in CD<sub>3</sub>CN, 0.040 mmol, 1.0 equiv) and CD<sub>3</sub>CD<sub>2</sub>OD (48 μL, 0.80 mmol, 20 equiv) were mixed. The orange solution was then transferred to a J. Young tube containing azobisisobutyronitrile, AIBN, (0.20 mL of 0.10 M solution in CD<sub>3</sub>CN, 0.020 mmol, 0.50 equiv). After heating the J. Young tube at 80 °C for 2 h, all volatile materials were vacuum transferred to another J. Young tube containing 1,3,5-trimethoxybenzene (0.10 mL of 0.40 M solution in CD<sub>3</sub>CN, 0.040 mmol, 1.0 equiv) as an internal standard. The deuteration of isobutyronitrile was determined by <sup>1</sup>H NMR spectroscopy (Figure S14).

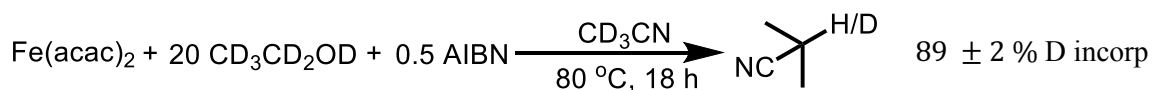

①: isobutyronitrile

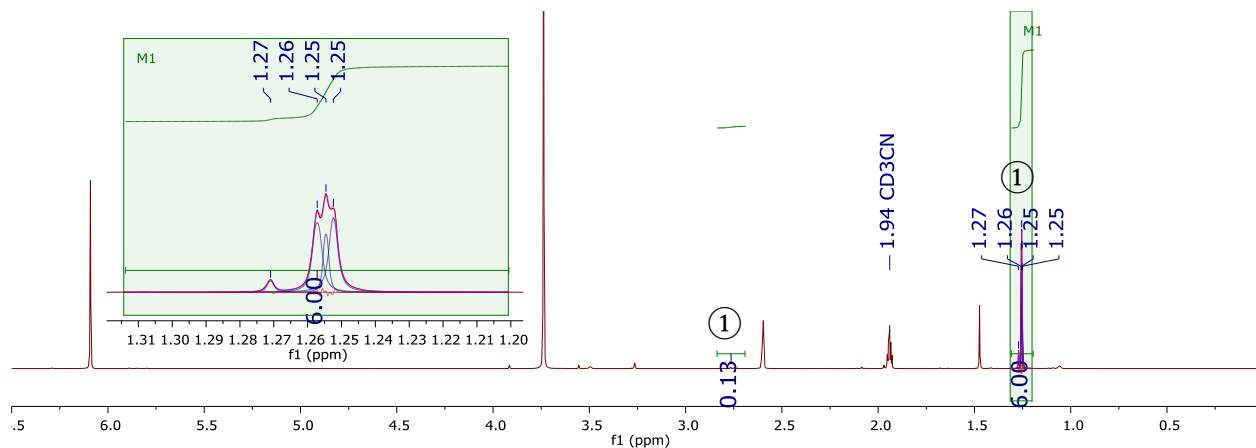

**Figure S14.** <sup>1</sup>H NMR of vacuum transferred reaction solution containing isobutyronitrile and ethanol. Deuterium incorporation to the product was examined by the change in the splitting pattern of hydrogens β to the nitrile group of isobutyronitrile and the decrease in signal intensity from the hydrogen α to the nitrile group of isobutyronitrile.

**1.1 Reaction between AIBN and 20 equiv EtOH.** In an N<sub>2</sub>-filled glovebox, azobisisobutyronitrile, AIBN (0.10 mL of 0.20 M solution in CD<sub>3</sub>CN, 0.020 mmol, 0.50 equiv) and 0.9 mL of CD<sub>3</sub>CN containing ethanol (48 μL, 0.40 mmol, 20 equiv) were transferred to a J.Young tube containing an internal capillary with [4.8 mM] solution of 1,3,5-trimethoxybenzene in toluene-d<sub>6</sub>. The <sup>1</sup>H NMR spectrum was recorded immediately to quantify the initial concentration of ethanol and AIBN in the solution (**Figure S15**, top). After heating the solution at 80 °C for 18 hours, the <sup>1</sup>H NMR spectrum was recorded to quantify the final concentration of starting materials and products (**Figure S15**, bottom).

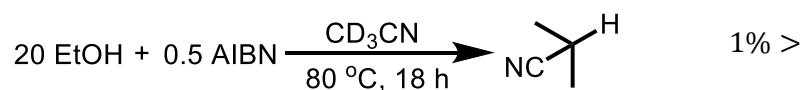

- ①: isobutyronitrile (IBN)                      ②: azobisisobutyronitrile (AIBN)  
 ③: tetramethylsuccinonitrile(TMSN)      ④: ethanol                              ⑤: internal standard

Before heating

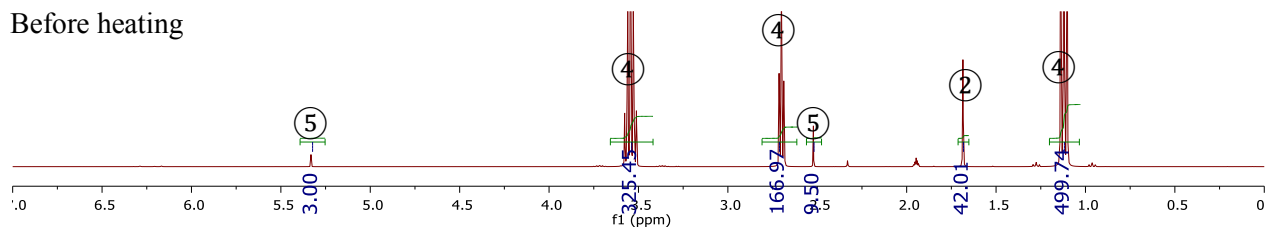

After 18 h at 80 °C

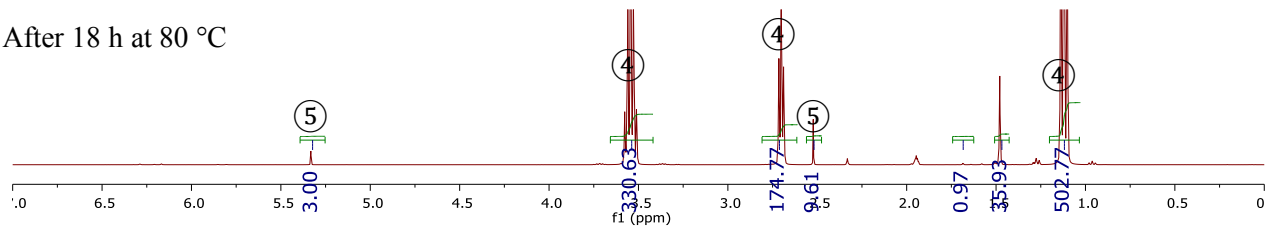

|                     | [EtOH]      | [AIBN]    | [TMSN]    | [IBN] |
|---------------------|-------------|-----------|-----------|-------|
| Before heating      | 793 ± 12 mM | 16 ± 1 mM | -         | -     |
| After 12 h at 80 °C | 812 ± 29 mM | -         | 14 ± 1 mM | -     |

**Figure S15.** <sup>1</sup>H NMR spectra of the reaction before and after heating at 80 °C. The table shows the concentrations of starting materials and products calculated using the internal capillary.

**1.J Mössbauer spectroscopic characterization of Fe(acac)<sub>2</sub>.** Fe(acac)<sub>2</sub> was prepared by a previously reported method.<sup>2</sup> The zero-field Mössbauer spectrum of solid Fe(acac)<sub>2</sub> was recorded at 80 K (**Figure S16**). The observation of two unique iron sites with different isomer shifts and quadrupole splittings is consistent with previously reported characterization of the compound.<sup>3</sup> X-ray crystallographic characterization of the compound showed a dimeric form where one iron site was in a distorted octahedral environment while the other was in a distorted square-pyramidal coordination. Previous Mössbauer characterization of the compound at 95 K showed two quadrupole doublets (one with  $\delta = 1.22$  mm/s  $\Delta E_Q = 2.47$  mm/s and the other with  $\delta = 1.20$  mm/s,  $\Delta E_Q = 2.17$  mm/s).<sup>3</sup>

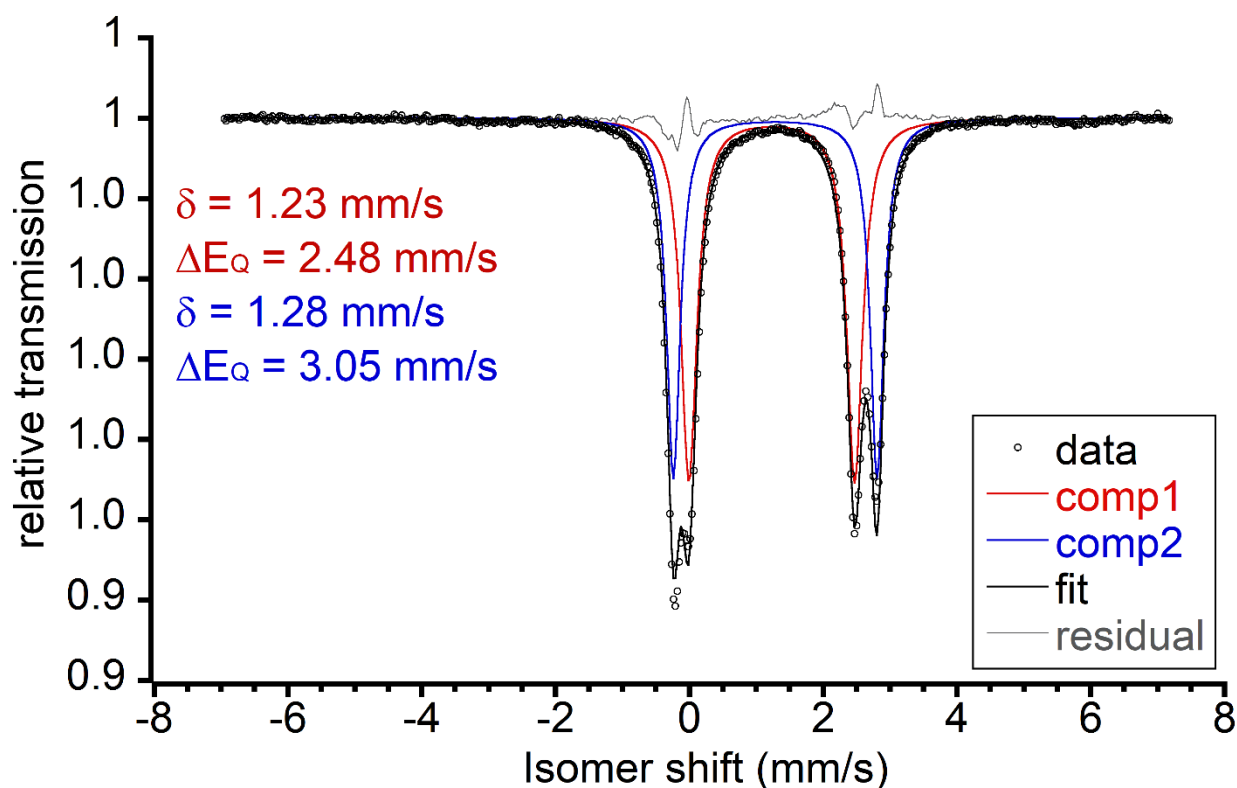

**Figure S16.** Zero-field Mössbauer spectrum of solid Fe(acac)<sub>2</sub>. The black circles represent the data, the red line is a simulation with fit parameters ( $\delta = 1.23$  mm/s,  $\Delta E_Q = 2.48$  mm/s), the blue line is a simulation with fit parameters ( $\delta = 1.28$  mm/s,  $\Delta E_Q = 3.05$  mm/s), the black line is the sum of the red and blue simulations, and the gray line is the residual.

### 1.K Monitoring reaction between $\text{Fe}(\text{acac})_2(\text{EtOH})_2$ and 0.5 equiv AIBN by Mössbauer spectroscopy.

In an  $\text{N}_2$ -filled glovebox,  $\text{Fe}(\text{acac})_2$  (80 mg, 0.32 mmol, 1.0 equiv.) and EtOH (370  $\mu\text{L}$ , 6.3 mmol, 20 equiv.) were mixed in a 50 mL resealable vessel with 6 mL of  $\text{C}_6\text{H}_6$ . To this orange solution, azobisisobutyronitrile (AIBN, 26 mg, 0.16 mmol, 0.50 equiv) in 2 mL  $\text{C}_6\text{H}_6$  was added. The resulting reaction mixture was heated at 80 °C for 2 h. After removing the solvents under vacuum, the crude material was analyzed by Mössbauer spectroscopy at 80 K (**Figure S17**).

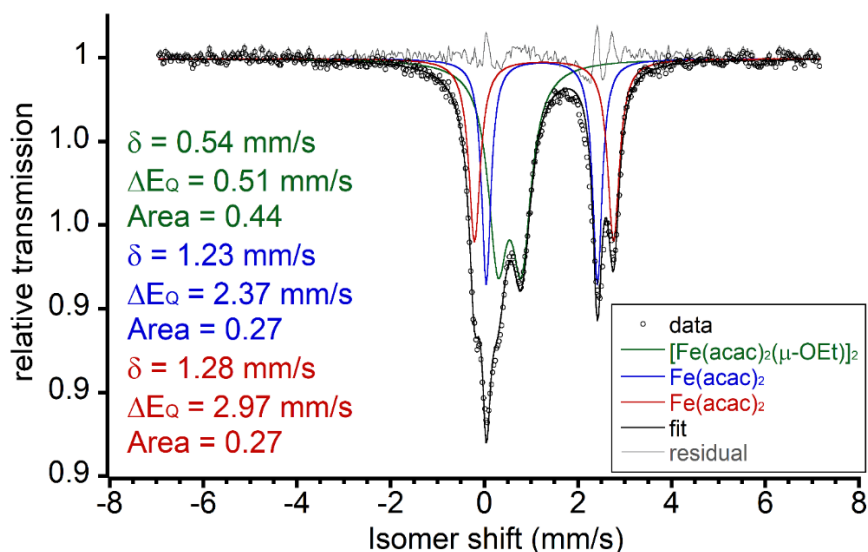

**Figure S17.** Zero-field Mössbauer spectrum of concentrated crude reaction mixture. The black circles represent the data, the red line is a simulation with fit parameters ( $\delta = 1.28 \text{ mm/s}$ ,  $\Delta E_Q = 2.97 \text{ mm/s}$ ), the blue line is a simulation with fit parameters ( $\delta = 1.23 \text{ mm/s}$ ,  $\Delta E_Q = 2.37 \text{ mm/s}$ ), the green line is a simulation with fit parameters ( $\delta = 0.54 \text{ mm/s}$ ,  $\Delta E_Q = 0.51 \text{ mm/s}$ ) the black line is the sum of green, red and blue simulations and the gray line is the residual.

### 1.L Monitoring reaction between $\text{Fe}(\text{acac})_2(\text{EtOH})_2$ and 2.0 equiv AIBN by Mössbauer spectroscopy.

In an  $\text{N}_2$ -filled glovebox,  $\text{Fe}(\text{acac})_2$  (100 mg, 0.40 mmol, 1.0 equiv.) and EtOH (450  $\mu\text{L}$ , 8.0 mmol, 20 equiv.) were mixed in a 50 mL resealable vessel with 6 mL of  $\text{C}_6\text{H}_6$ . To this orange solution, azobisisobutyronitrile (AIBN, 130 mg, 0.80 mmol, 2.0 equiv.) in 2 mL  $\text{C}_6\text{H}_6$  was added. The resulting reaction mixture was heated at 80  $^\circ\text{C}$  for 2 h. After removing the solvents, resulting mixture of reaction was used to record the Mössbauer spectrum (**Figure S18**). Crystals suitable for X-ray diffraction were obtained by concentrating a solution of this material in EtOH at -20  $^\circ\text{C}$ .

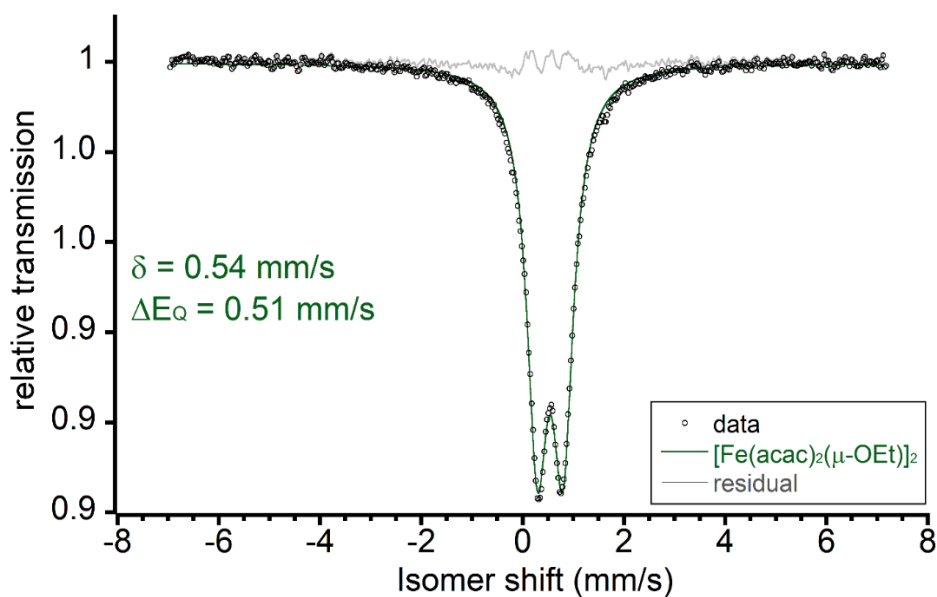

**Figure S18.** Zero-field Mössbauer spectrum of the crude reaction mixture with 2.0 equiv of AIBN. The black circles are the data, the green line is a simulation with fit parameters  $\delta = 0.54 \text{ mm/s}$ ,  $\Delta E_Q = 0.51 \text{ m/s}$ . The gray line is the residual.

### Crystal structure of [Fe(acac)<sub>2</sub>(μ-OEt)]<sub>2</sub>

Low-temperature diffraction data ( $\omega$ -scans) were collected on a Rigaku MicroMax-007HF diffractometer coupled to a Dectris Pilatus3R detector with Mo K $\alpha$  ( $\lambda = 0.71073$  Å) for the structure of [Fe(acac)<sub>2</sub>(μ-OEt)]<sub>2</sub>. The diffraction images were processed and scaled using Rigaku Oxford Diffraction software (CrysAlisPro; Rigaku OD: The Woodlands, TX, 2015). The structure was solved with SHELXT and was refined against  $F^2$  on all data by full-matrix least squares with SHELXL (Sheldrick, G. M. *Acta Cryst.* **2008**, *A64*, 112–122). All non-hydrogen atoms were refined anisotropically. Hydrogen atoms were included in the model at geometrically calculated positions and refined using a riding model. The isotropic displacement parameters of all hydrogen atoms were fixed to 1.2 times the U value of the atoms to which they are linked (1.5 times for methyl groups). The full numbering scheme of compound [Fe(acac)<sub>2</sub>(μ-OEt)]<sub>2</sub> can be found in the full details of the X-ray structure determination (CIF), which is included as Supporting Information. CCDC number 1829492 contains the supplementary crystallographic data for this paper. These data can be obtained free of charge from The Cambridge Crystallographic Data Center via [www.ccdc.cam.ac.uk/data\\_request/cif](http://www.ccdc.cam.ac.uk/data_request/cif).

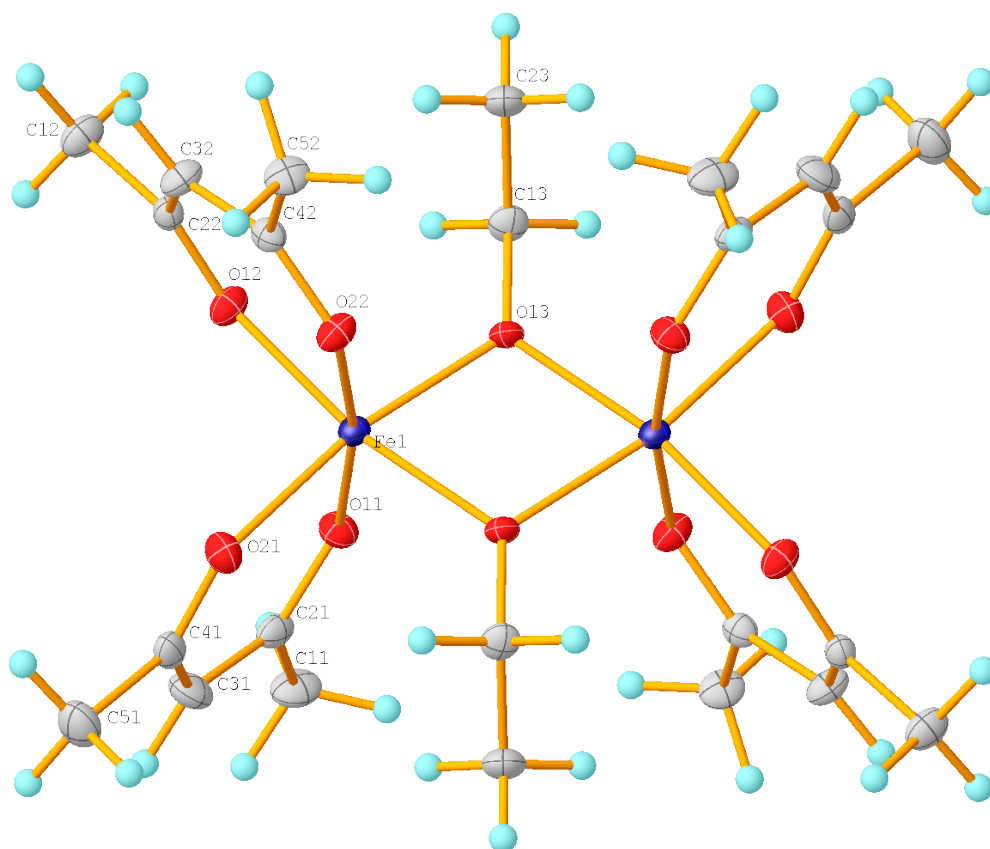

**Figure S19.** The complete numbering scheme of [Fe(acac)<sub>2</sub>(μ-OEt)]<sub>2</sub> with 50% thermal ellipsoid probability levels. Only the asymmetric unit is number. The hydrogen atoms are shown as circles for clarity.

**Table 2.** Crystal data and structure refinement for of [Fe(acac)<sub>2</sub>(μ-OEt)]<sub>2</sub>.

|                                   |                                                                 |                 |
|-----------------------------------|-----------------------------------------------------------------|-----------------|
| Identification code               | 007c-17053                                                      |                 |
| Empirical formula                 | C <sub>24</sub> H <sub>38</sub> Fe <sub>2</sub> O <sub>10</sub> |                 |
| Formula weight                    | 598.24                                                          |                 |
| Temperature                       | 93(2) K                                                         |                 |
| Wavelength                        | 0.71073 Å                                                       |                 |
| Crystal system                    | Triclinic                                                       |                 |
| Space group                       | P-1                                                             |                 |
| Unit cell dimensions              | a = 8.3679(2) Å                                                 | α = 68.047(4)°. |
|                                   | b = 9.3117(4) Å                                                 | β = 81.979(3)°. |
|                                   | c = 10.5715(4) Å                                                | γ = 65.376(3)°. |
| Volume                            | 694.39(5) Å <sup>3</sup>                                        |                 |
| Z                                 | 1                                                               |                 |
| Density (calculated)              | 1.431 g/cm <sup>3</sup>                                         |                 |
| Absorption coefficient            | 1.095 mm <sup>-1</sup>                                          |                 |
| F(000)                            | 314                                                             |                 |
| Crystal size                      | 0.200 x 0.200 x 0.200 mm <sup>3</sup>                           |                 |
| Crystal color and habit           | Red Block                                                       |                 |
| Diffractometer                    | Dectris Pilatus 3R                                              |                 |
| Theta range for data collection   | 2.883 to 27.473°.                                               |                 |
| Index ranges                      | -10 ≤ h ≤ 10, -12 ≤ k ≤ 12, -13 ≤ l ≤ 13                        |                 |
| Reflections collected             | 16738                                                           |                 |
| Independent reflections           | 3186 [R(int) = 0.0241]                                          |                 |
| Observed reflections (I > 2σ(I))  | 3012                                                            |                 |
| Completeness to theta = 25.242°   | 99.8 %                                                          |                 |
| Absorption correction             | Semi-empirical from equivalents                                 |                 |
| Max. and min. transmission        | 1.00000 and 0.91116                                             |                 |
| Solution method                   | SHELXT-2014/5 (Sheldrick, 2014)                                 |                 |
| Refinement method                 | SHELXL-2014/7 (Sheldrick, 2014)                                 |                 |
| Data / restraints / parameters    | 3186 / 0 / 168                                                  |                 |
| Goodness-of-fit on F <sup>2</sup> | 1.105                                                           |                 |
| Final R indices [I > 2σ(I)]       | R1 = 0.0229, wR2 = 0.0618                                       |                 |
| R indices (all data)              | R1 = 0.0244, wR2 = 0.0623                                       |                 |
| Largest diff. peak and hole       | 0.352 and -0.376 e.Å <sup>-3</sup>                              |                 |

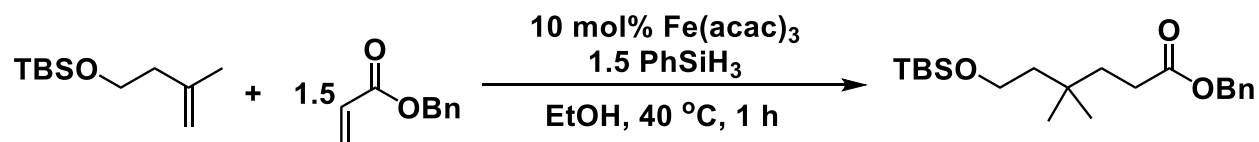

**1.L Determination of overall barrier for the catalytic reaction.** The overall rate constant for the catalytic reaction was determined by measuring the rate of formation of coupling product and assuming the reaction orders determined previously.<sup>2</sup>

$$\text{rate of reaction} = k \frac{[\text{Fe(acac)}_3]^{0.5} [\text{compound } \mathbf{1}]^{0.5} [\text{PhSiH}_3]^1}{[\text{benzyl acrylate}]^1}$$

**Table S3.** Determination of  $\Delta G^\ddagger$  for the catalytic reaction

| Run | Rate of reaction                      | $k$                                 | $\Delta G^\ddagger$ |
|-----|---------------------------------------|-------------------------------------|---------------------|
| 1   | $7.2 \times 10^{-5} \text{ M s}^{-1}$ | $1.1 \times 10^{-3} \text{ s}^{-1}$ | 22.6 kcal/mol       |
| 2   | $6.2 \times 10^{-5} \text{ M s}^{-1}$ | $9.8 \times 10^{-4} \text{ s}^{-1}$ | 22.7 kcal/mol       |
| 3   | $6.1 \times 10^{-5} \text{ M s}^{-1}$ | $9.6 \times 10^{-4} \text{ s}^{-1}$ | 22.7 kcal/mol       |



**1.M Determination of association constant between Fe(acac)<sub>2</sub> and EtOH.** The association constant for Fe(acac)<sub>2</sub> and EtOH was determined by titration experiments at 80 °C using the following equation.<sup>4</sup>

$$\Delta\delta = \frac{K_{eq} \cdot \delta_{\Delta HG} \cdot [\text{EtOH}]}{1 + K_{eq} \cdot [\text{EtOH}]}$$

$$\Delta\delta = \delta_{\text{Fe(acac)}_2} - \delta_{\text{observed}}; \delta_{\Delta HG} = \text{largest } \Delta\delta \text{ observed in the experiment}$$

Samples were prepared by mixing 0.40 mL of 0.050 M Fe(acac)<sub>2</sub> in C<sub>6</sub>D<sub>6</sub> with 0, 10, 20, 30, 40, 80 μL of 0.50 M EtOH solution in C<sub>6</sub>D<sub>6</sub> and diluting to 0.50 mL C<sub>6</sub>D<sub>6</sub>. Entries 6 to 13 were prepared by using 6, 12, 24, 60, 90, 120, 240 μL of absolute EtOH. All <sup>1</sup>H NMR samples were then taken to an NMR spectrometer that was preheated at 80 °C; the samples were kept in the instrument for 5 minutes before the data collection for temperature equilibration.

**Table S4.** Concentration of [EtOH] and Δδ used for determining association constant.

| Entry | [Fe(acac) <sub>2</sub> ] | [EtOH] (mM) | δ observed (ppm) | Δδ (δ <sub>Fe(acac)2</sub> -δ <sub>obs</sub> ) |
|-------|--------------------------|-------------|------------------|------------------------------------------------|
| 1     | 40 mM                    | 0           | 39.45            | -                                              |
| 2     | 40 mM                    | 10          | 39.43            | 0.02                                           |
| 3     | 40 mM                    | 20          | 39.20            | 0.25                                           |
| 4     | 40 mM                    | 30          | 38.83            | 0.62                                           |
| 5     | 40 mM                    | 40          | 38.53            | 0.92                                           |
| 6     | 40 mM                    | 80          | 37.34            | 2.11                                           |
| 7     | 40 mM                    | 200         | 34.32            | 5.13                                           |
| 8     | 40 mM                    | 400         | 32.00            | 7.45                                           |
| 9     | 40 mM                    | 800         | 29.76            | 9.69                                           |
| 10    | 40 mM                    | 2000        | 28.23            | 11.22                                          |
| 11    | 40 mM                    | 3000        | 27.89            | 11.56                                          |
| 12    | 40 mM                    | 4000        | 27.57            | 11.88                                          |
| 13    | 40 mM                    | 8000        | 26.70            | 12.75                                          |

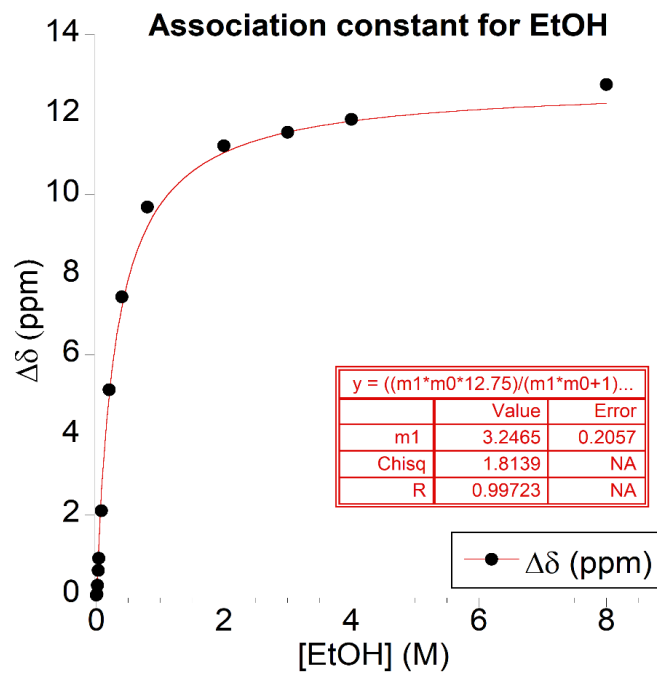

$$K_{\text{eq}} = 3.2 \pm 0.2 \text{ M}^{-1}$$

$$\Delta G = -0.8 \pm 0.1 \text{ kcal/mol}$$

**Figure S20.** Data used for calculation of  $K_{\text{eq}}$ . The fit for weak binding does not specify the number of EtOH molecules that bind. The observation of one  $K_{\text{eq}}$  is reasonable if the first EtOH binding constant is weaker than the binding constant of the second EtOH, as indicated by the DFT computations given in the text.

**1.N Monitoring product distribution and starting material consumption of olefin coupling.** In a N<sub>2</sub>-filled glove box, compound **1** (120 mg, 0.60 mmol, 1.0 equiv.), benzyl acrylate (90 μL, 0.60 mmol, 1.0 equiv.), Fe(acac)<sub>3</sub> (11 mg, 0.030 mmol, 0.050 equiv.) and 1,3,5-trimethoxybenzene (100 mg, 0.60 mmol, 1.0 equiv.) were added to a Schlenk flask with 3 mL of EtOH. The flask was then taken out of the glovebox and stirred at room temperature for 1 minute to make a homogenous reaction solution. Under a flow of N<sub>2</sub>, PhSiH<sub>3</sub> (150 μL, 1.20 mmol, 2.0 equiv) was injected into the solution, and the reaction was heated to 40 °C in an oil bath. The reaction was monitored by taking aliquots of the reaction mixture at 0, 1, 2, 3, 4, 5, 6, 7, 8, 9, 10, 15, 20 min and immediately filtering each reaction aliquot through a silica plug with EtOAc. The product formation and starting material consumption at each time point were analyzed by gas chromatography.

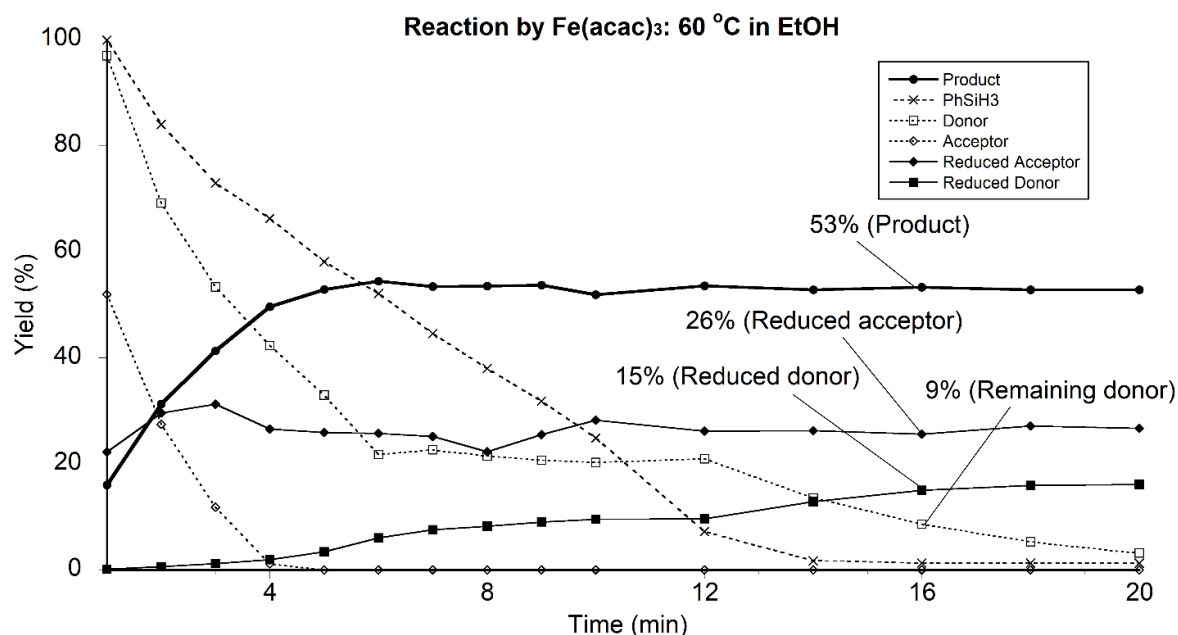

**Figure S21.** Product distribution of olefin coupling reaction.

**1.O Reaction between AIBN and Et<sub>3</sub>NHBF<sub>4</sub>.** In an N<sub>2</sub>-filled glovebox, azobisisobutyronitrile, AIBN (3.3 mg, 0.020 mmol, 1.0 equiv) and triethylammonium tetrafluoroborate (8 mg, 0.040 mmol, 2.0 equiv) were mixed in 1 mL of CD<sub>3</sub>CN. The solution was transferred to a J.Young tube containing an internal capillary with [4.8 mM] solution of 1,3,5-trimethoxybenzene in toluene-d<sub>6</sub>. The <sup>1</sup>H NMR spectrum was recorded immediately to quantify the initial concentration AIBN in the solution (**Figure S22**, top). After heating the solution at 80 °C for 9 hours, the <sup>1</sup>H NMR spectrum was recorded to quantify the final concentration of starting materials and products (**Figure S22**, bottom).

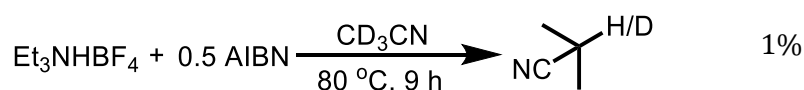

- ①: isobutyronitrile (IBN)                      ②: azobisisobutyronitrile (AIBN)  
 ③: tetramethylsuccinonitrile(TMSN)        ④: Et<sub>3</sub>NHBF<sub>4</sub>                      ⑤: internal standard

Before heating

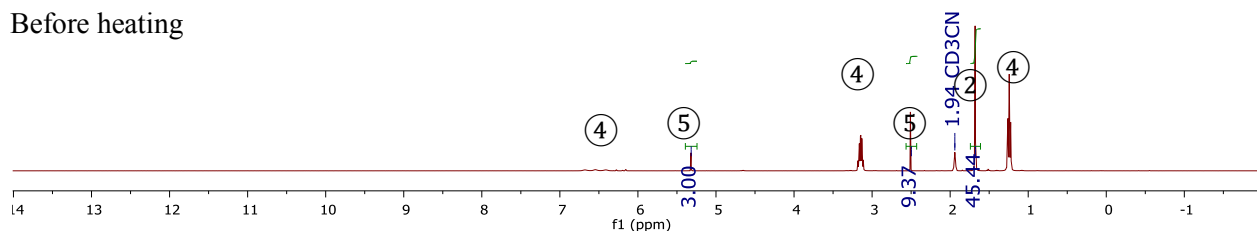

After 9 h at 80 °C

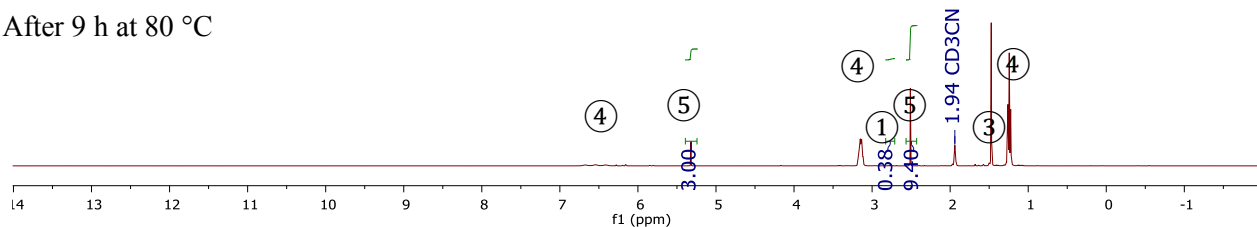

|                     | [AIBN]    | [IBN]  |
|---------------------|-----------|--------|
| Before heating      | 17 ± 1 mM | -      |
| After 12 h at 80 °C | -         | 0.3 mM |

**Figure S22.** <sup>1</sup>H NMR spectra of the reaction before and after heating at 80 °C. The table shows the concentrations of starting materials and products calculated using the internal capillary.

**1.P Reaction between Fe(acac)<sub>2</sub> and 0.5 equiv AIBN with 1 equiv Et<sub>3</sub>NHBF<sub>4</sub>.** In an N<sub>2</sub>-filled glovebox, Fe(acac)<sub>2</sub> (10 mg, 0.040 mmol, 1.0 equiv) and triethylammonium tetrafluoroborate (8 mg, 0.040 mmol, 1.0 equiv) were mixed in 0.5 mL of CD<sub>3</sub>CN. The solution was transferred to a J.Young tube containing azobisisobutyronitrile (AIBN, 3.3 mg, 0.020 mmol, 0.50 equiv) in 0.5 mL of CD<sub>3</sub>CN. After heating the J. Young tube at 80 °C for 18 h, all volatile materials were vacuum transferred to another J. Young tube containing 1,3,5-trimethoxybenzene (6.7 mg, 0.040 mmol, 1.0 equiv.) as an internal standard. The amount of isobutyronitrile was determined by <sup>1</sup>H NMR spectroscopy (**Figure S23**)

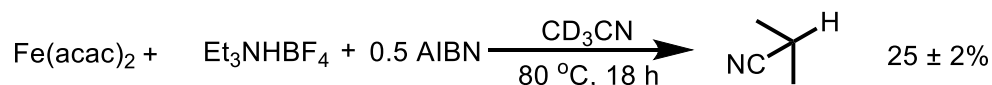

①: isobutyronitrile    ②: triethylamine    ③: 1,3,5 trimethoxy benzene    ④\*: diethyl ether  
\*residual diethyl ether from Et<sub>3</sub>NHBF<sub>4</sub>

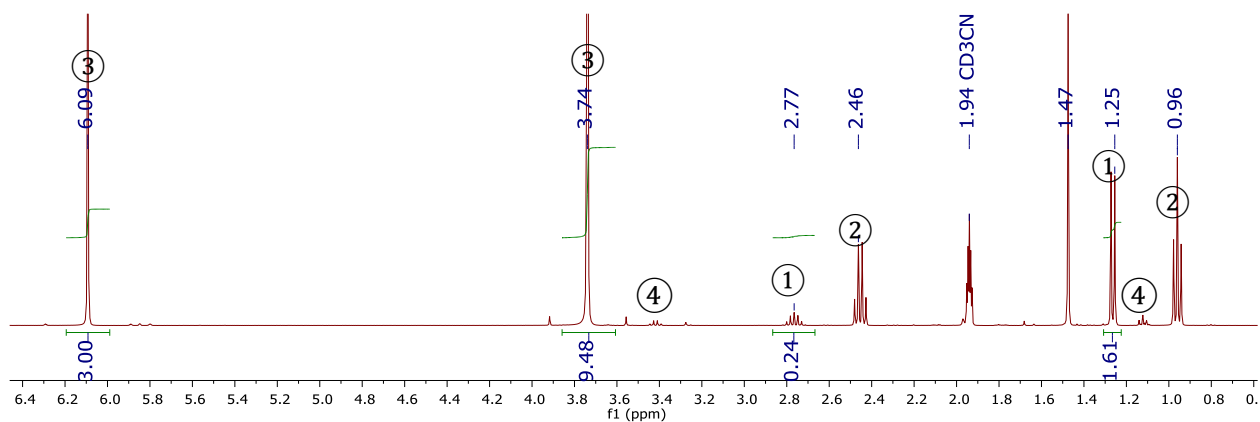

**Figure S23.** <sup>1</sup>H NMR of vacuum transferred reaction solution containing isobutyronitrile and ethanol. Integrations of α and β hydrogens to nitrile group of isobutyronitrile respect to the integrations of 1,3,5-trimethoxybenzene were used to quantify the formation of isobutyronitrile.

**1.Q Reaction between Fe(acac)<sub>2</sub> and 0.5 equiv AIBN with 20 equiv Et<sub>3</sub>NHBF<sub>4</sub>.** In an N<sub>2</sub>-filled glovebox, Fe(acac)<sub>2</sub> (10 mg, 0.040 mmol, 1.0 equiv) and triethylammonium tetrafluoroborate (160 mg, 0.80 mmol, 20.0 equiv) were mixed in 0.5 mL of CD<sub>3</sub>CN. The solution was transferred to a J.Young tube containing azobisisobutyronitrile (AIBN, 3.3 mg, 0.020 mmol, 0.50 equiv) in 0.5 mL of CD<sub>3</sub>CN. After heating the J. Young tube at 80 °C for 18 h, all volatile materials were vacuum transferred to another J. Young tube containing 1,3,5-trimethoxybenzene (6.7 mg, 0.040 mmol, 1.0 equiv.) as an internal standard. The amount of isobutyronitrile was determined by <sup>1</sup>H NMR spectroscopy (**Figure S24**)

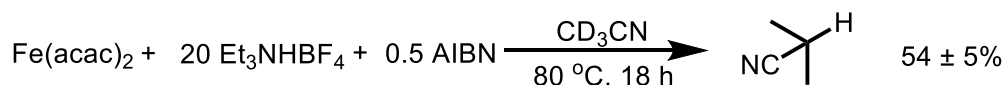

①: isobutyronitrile    ②: triethylamine    ③: 1,3,5 trimethoxybenzene    ④\*: diethyl ether  
\*residual diethyl ether from Et<sub>3</sub>NHBF<sub>4</sub>

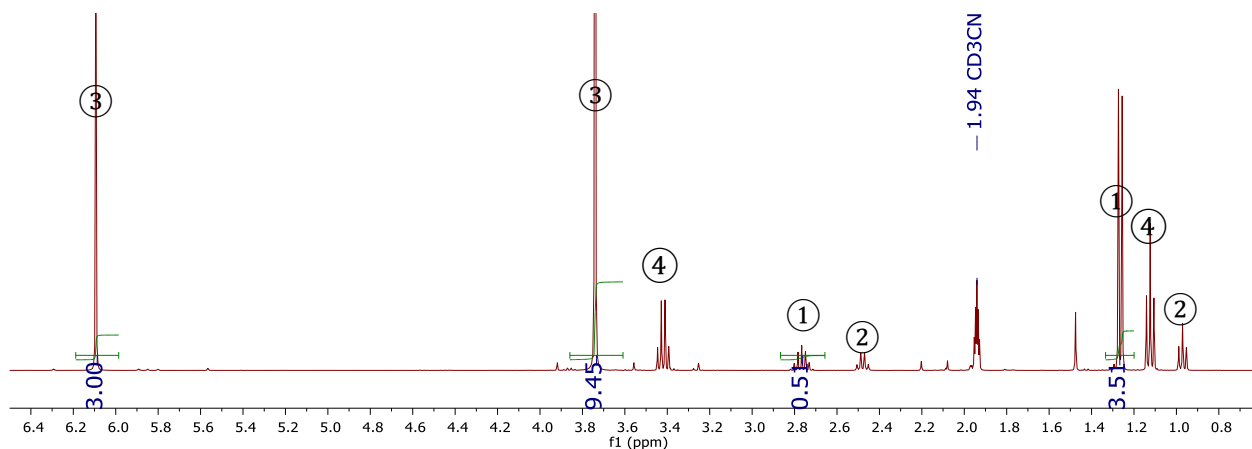

**Figure S24.** <sup>1</sup>H NMR of vacuum transferred reaction solution containing isobutyronitrile and ethanol. Integrations of α and β hydrogens to nitrile group of isobutyronitrile respect to the integrations of 1,3,5-trimethoxybenzene were used to quantify the formation of isobutyronitrile.

**1.R Competition reaction between PhSiD<sub>3</sub> and PhSi(O<sup>i</sup>Pr)H<sub>2</sub>.** In an N<sub>2</sub>-filled glove box, compound **1** (20 mg, 0.10 mmol, 1.0 equiv) and benzyl acrylate (15 μL, 0.10 mmol, 1.0 equiv) and Fe(acac)<sub>3</sub> (3.5 mg, 0.010 mmol, 0.10 equiv) were added to a vial. PhSiD<sub>3</sub> (21 mg of 65% solution in diethyl ether, 0.15 mmol, 1.5 equiv) and PhSi(O<sup>i</sup>Pr)H<sub>2</sub> (25 mg, 0.15 mmol, 1.5 equiv) in 0.5 mL of EtOH were added to the reaction vial. The reaction vial was then placed immediately to preheated oil bath at 60 °C. After stirring the reaction for an hour, 0.3 mL of reaction aliquot was taken out and filtrated through a plug of silica (3.0 cm) in a pipette with 2.0 mL of hexanes:EtOAc (4:1). From this eluent, the ratio of H/D incorporation in the cross-coupling product was determined by mass spectrometry (**Figure S25**).

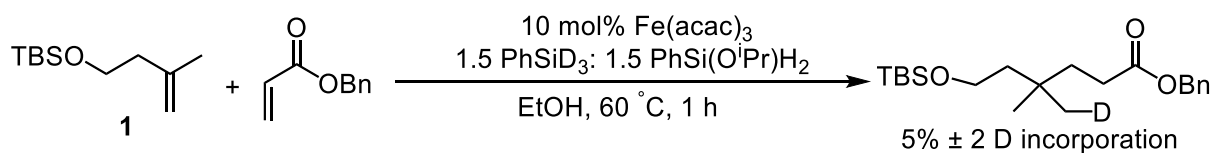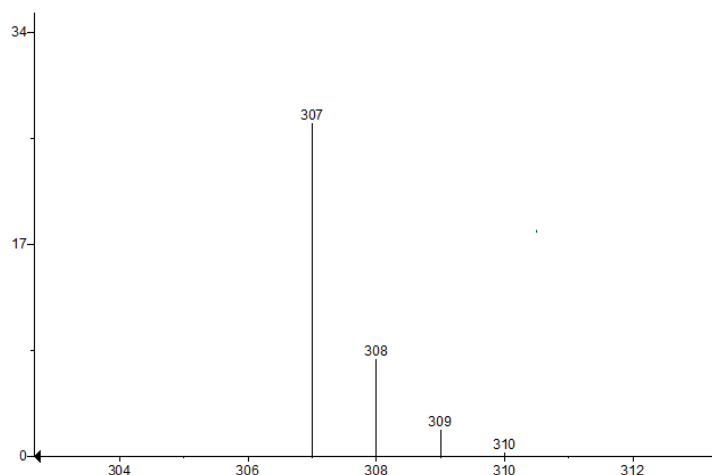

|                | 307 | 308     | 309    | 310 |
|----------------|-----|---------|--------|-----|
| Observed (%)   | 100 | 28.9(3) | 7.7(9) | 1.1 |
| Calculated (%) | 100 | 28.9(8) | 7.5(0) | 0.8 |
| Error          | 0   | 0.05    | 0.2    | 0.3 |

**Figure S25.** Mass spectrum of H/D product mixture from the reaction. Observed peaks correspond to loss of the tBu group to form C<sub>17</sub>H<sub>27</sub>O<sub>3</sub>Si<sup>+</sup> at m/z 307 (100%), 308 (28.9%), 309 (7.7%) and 310 (1.1%). From these, the ratio of H/D product was calculated to be 21.5:1 (H:D).

## 2. Computational Procedures and Data

**Computational Details.** The computational work was carried out using the Gaussian09 suite of programs.<sup>5</sup> Gas-phase geometry optimizations were performed without any symmetry constraint using the BPW91\* functional, which is a reparametrized version of B3PW91 with the same parameters previously optimized for B3LYP,<sup>6</sup> and the 6-31G(d,p) basis functions for all light atoms (H, C, O, Si), whereas the Fe atom was treated with the LANL2DZ basis set augmented by an f polarization function ( $\alpha = 2.462$ ).<sup>7</sup> The unrestricted formulation was used for open-shell molecules, which typically yielded only minor spin contamination for all mononuclear systems ( $\langle S^2 \rangle$  at convergence was very close to the expected values, namely 0.75 for doublet states, 2 for triplet states, 3.75 for quartet states, 6 for quintet states and 8.75 for sextet states). Significant spin contaminations were found in the dinuclear structures with an open-shell singlet state, with the strongest discrepancy for the antiferromagnetic ( $S = 5/2, 5/2$ )  $[\text{Fe}(\text{acac})_2(\text{OMe})_2]_2$ , for which  $\langle S^2 \rangle = 4.95$  vs. a theoretical value of 0 (the corresponding ferromagnetic dimer with  $S = 5$  yields  $\langle S^2 \rangle = 30.01$  vs. a theoretical value of 30). Some of the O-bound enolate complexes also had large values of  $\langle S^2 \rangle$ , and showed significant spin density on the alpha-carbon atom. We presume that this corresponds to a second resonance structure  $\text{Fe}^{2+}-\text{O}=\text{C}(\text{OR})-\text{C}\cdot\text{HR}$  being important, meaning that a single-determinant model is not ideal. Please see the individual computational results below, which each give the value of  $\langle S^2 \rangle$ .

All final geometries were characterized as local minima by verifying that all second derivatives of the energy were positive. Thermochemical corrections were obtained at 298.15 K on the basis of frequency calculations, using the standard approximations (ideal gas, rigid rotor and harmonic oscillator). Corrections for dispersion were carried out at the fixed BPW91\* optimized geometries using Grimme's D3 empirical method (BPW91\*-D3), using SR6 and S8 parameters identical to those optimized for B3PW91.<sup>8</sup> Solvation effects in ethanol solution were taken into account by treating the solvent medium as a polarizable continuum with the SMD approach,<sup>9</sup> using the standard parameters and the dielectric constant ( $\epsilon = 24.852$ ) of the Gaussian program package. A further correction of 1.95 kcal/mol was applied to bring the  $G$  values from the gas phase (1 atm) to the solution (1 mol/L) standard state.<sup>10</sup>



## 2.A (acac)<sub>2</sub>Fe<sup>III</sup> methoxides

### A1. Energy diagram and views of the optimized geometries

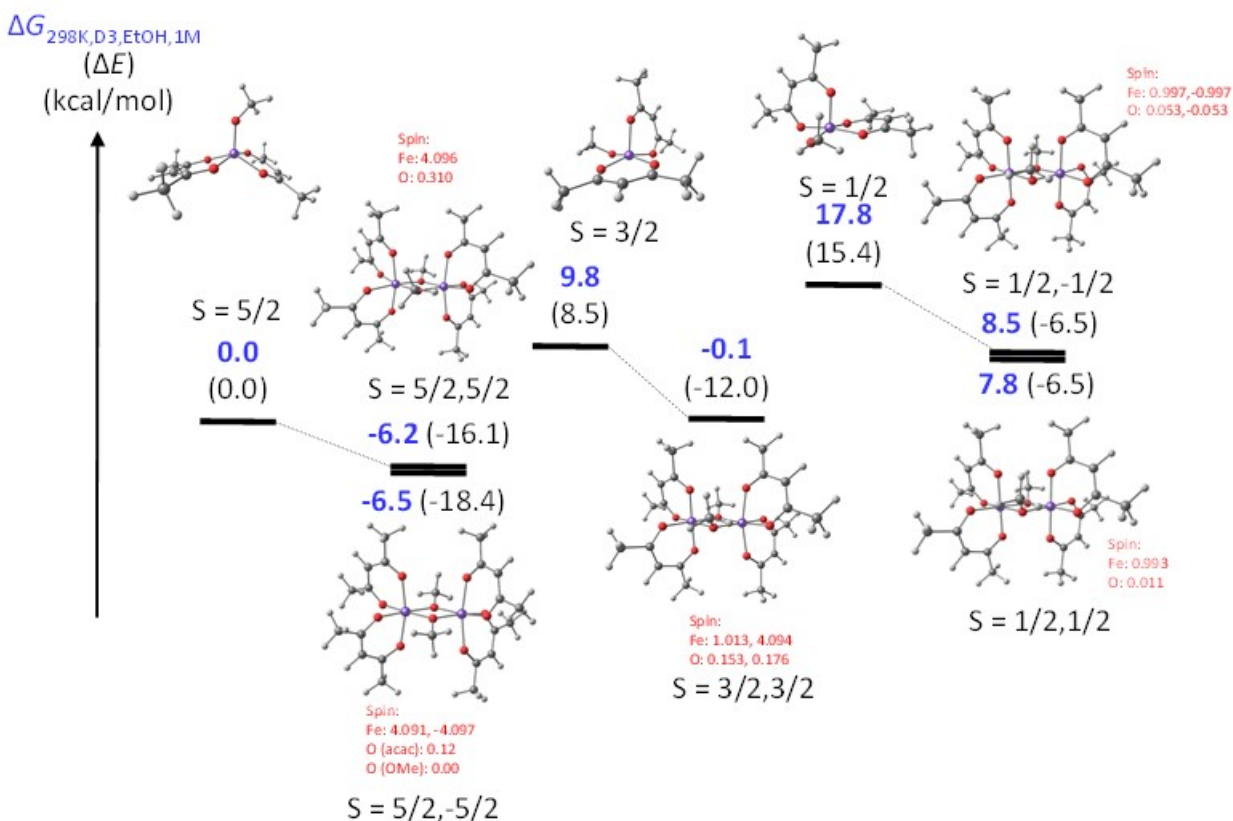

### A2. Cartesian coordinates and energies (gas-phase E and D3-corrected G in EtOH at 298 K, in hartrees) of the optimized geometries.

Fe(acac)<sub>2</sub>(OMe) S = 5/2

E = -928.28484578

G<sub>298K,D3,EtOH,1M</sub> = -928.136367

<S<sup>2</sup>> = 8.762

|    |              |              |              |   |              |              |              |
|----|--------------|--------------|--------------|---|--------------|--------------|--------------|
| 26 | 0.045704000  | 0.009496000  | 0.412557000  | 6 | -3.491380000 | -2.237045000 | -0.730622000 |
| 8  | -1.155265000 | 1.453178000  | -0.235616000 | 1 | -4.466040000 | -1.990031000 | -1.160652000 |
| 8  | -1.470766000 | -1.246149000 | -0.024373000 | 1 | -2.973046000 | -2.944896000 | -1.388469000 |
| 6  | -2.340282000 | 1.418445000  | -0.712593000 | 1 | -3.637129000 | -2.744011000 | 0.230735000  |
| 6  | -3.095325000 | 0.250075000  | -0.885098000 | 6 | -2.918096000 | 2.755830000  | -1.099819000 |
| 1  | -4.092264000 | 0.333754000  | -1.305793000 | 1 | -3.931334000 | 2.675877000  | -1.503324000 |
| 6  | -2.620051000 | -1.022859000 | -0.527097000 | 1 | -2.927620000 | 3.412584000  | -0.221631000 |
| 8  | 1.539778000  | 1.318547000  | 0.151729000  | 1 | -2.266485000 | 3.228924000  | -1.844175000 |
| 8  | 1.226655000  | -1.334375000 | -0.452586000 | 6 | 3.082341000  | -2.555726000 | -1.234930000 |
| 6  | 2.753826000  | 1.114212000  | -0.173157000 | 1 | 4.144935000  | -2.453043000 | -1.471915000 |
| 6  | 3.264965000  | -0.123531000 | -0.600741000 | 1 | 2.953484000  | -3.337805000 | -0.477017000 |
| 1  | 4.315318000  | -0.186355000 | -0.866654000 | 1 | 2.540625000  | -2.885583000 | -2.129482000 |
| 6  | 2.473260000  | -1.272329000 | -0.729607000 | 6 | 3.661988000  | 2.315100000  | -0.087905000 |
|    |              |              |              | 1 | 4.687537000  | 2.091293000  | -0.394502000 |
|    |              |              |              | 1 | 3.260161000  | 3.117472000  | -0.718038000 |
|    |              |              |              | 1 | 3.665149000  | 2.689403000  | 0.942870000  |
|    |              |              |              | 8 | 0.081875000  | -0.192918000 | 2.209064000  |
|    |              |              |              | 6 | -0.895113000 | -0.534188000 | 3.141858000  |

|   |              |              |             |
|---|--------------|--------------|-------------|
| 1 | -1.405025000 | 0.364147000  | 3.528778000 |
| 1 | -1.658593000 | -1.200727000 | 2.708162000 |
| 1 | -0.432990000 | -1.052079000 | 3.997148000 |

**[Fe(acac)<sub>2</sub>(OMe)<sub>2</sub> S = 5/2,5/2 (overall S = 5)**

**E = -1856.59531473**

**G<sub>298K,D3,EtOH,1M</sub> = -1856.282663**

**<S<sup>2</sup>> = 30.015**

|    |              |              |              |
|----|--------------|--------------|--------------|
| 26 | -1.552409000 | 0.079721000  | 0.058342000  |
| 8  | -2.875010000 | -0.218298000 | 1.560743000  |
| 8  | -1.722708000 | -1.928240000 | -0.264172000 |
| 6  | -3.646069000 | -1.210039000 | 1.787294000  |
| 6  | -3.583309000 | -2.440081000 | 1.118545000  |
| 1  | -4.289324000 | -3.216233000 | 1.397175000  |
| 6  | -2.610204000 | -2.738092000 | 0.146430000  |
| 8  | -1.813159000 | 2.059636000  | 0.303108000  |
| 8  | -3.002508000 | 0.226682000  | -1.375812000 |
| 6  | -2.668145000 | 2.857960000  | -0.193555000 |
| 6  | -3.632055000 | 2.506259000  | -1.154146000 |
| 1  | -4.311347000 | 3.274820000  | -1.509515000 |
| 6  | -3.735580000 | 1.217946000  | -1.699502000 |
| 6  | -2.575483000 | -4.114979000 | -0.473422000 |
| 1  | -3.331456000 | -4.786368000 | -0.056183000 |
| 1  | -2.730935000 | -4.024296000 | -1.555388000 |
| 1  | -1.580995000 | -4.552456000 | -0.327705000 |
| 6  | -4.672611000 | -0.999009000 | 2.873881000  |
| 1  | -5.297115000 | -1.881234000 | 3.041069000  |
| 1  | -4.162952000 | -0.734137000 | 3.808175000  |
| 1  | -5.311487000 | -0.148509000 | 2.606801000  |
| 6  | -4.775697000 | 0.938021000  | -2.758466000 |
| 1  | -5.373246000 | 1.819695000  | -3.007448000 |
| 1  | -4.279255000 | 0.570483000  | -3.664708000 |
| 1  | -5.439752000 | 0.137487000  | -2.410585000 |
| 6  | -2.598985000 | 4.278981000  | 0.311337000  |
| 1  | -3.351976000 | 4.927334000  | -0.145839000 |
| 1  | -2.729746000 | 4.280458000  | 1.400065000  |
| 1  | -1.600276000 | 4.682929000  | 0.107848000  |
| 8  | 0.039223000  | 0.100039000  | 1.263377000  |
| 8  | -0.054424000 | 0.097716000  | -1.254320000 |
| 26 | 1.537658000  | 0.070304000  | -0.040893000 |
| 6  | 0.127696000  | -0.310106000 | 2.604667000  |
| 1  | -0.876403000 | -0.348743000 | 3.046126000  |
| 1  | 0.591389000  | -1.305621000 | 2.668146000  |
| 1  | 0.745138000  | 0.395511000  | 3.178704000  |
| 6  | -0.123799000 | -0.487282000 | -2.531944000 |
| 1  | 0.818222000  | -0.315883000 | -3.069026000 |
| 1  | -0.303752000 | -1.569384000 | -2.449901000 |
| 1  | -0.952331000 | -0.043517000 | -3.100739000 |
| 8  | 1.682911000  | -1.942540000 | 0.258914000  |
| 8  | 2.871970000  | -0.225203000 | -1.534607000 |
| 8  | 1.826339000  | 2.044923000  | -0.280639000 |
| 6  | 2.555143000  | -2.762709000 | -0.163927000 |

|   |             |              |              |
|---|-------------|--------------|--------------|
| 6 | 3.621092000 | -1.228928000 | -1.779797000 |
| 6 | 2.736438000 | 2.810471000  | 0.168255000  |
| 6 | 4.651686000 | -1.020583000 | -2.863145000 |
| 1 | 4.147192000 | -0.729824000 | -3.792516000 |
| 1 | 5.307706000 | -0.187787000 | -2.582208000 |
| 1 | 5.258178000 | -1.912322000 | -3.045538000 |
| 6 | 2.494840000 | -4.147246000 | 0.436541000  |
| 1 | 2.650037000 | -4.074476000 | 1.519874000  |
| 1 | 1.492580000 | -4.564097000 | 0.283836000  |
| 1 | 3.239063000 | -4.826431000 | 0.010845000  |
| 6 | 3.533129000 | -2.468976000 | -1.132352000 |
| 1 | 4.223485000 | -3.254415000 | -1.423913000 |
| 8 | 2.976368000 | 0.194355000  | 1.406135000  |
| 6 | 3.767340000 | 1.154516000  | 1.682914000  |
| 6 | 4.816207000 | 0.852435000  | 2.727033000  |
| 1 | 4.322877000 | 0.537241000  | 3.654423000  |
| 1 | 5.430605000 | 0.009159000  | 2.389048000  |
| 1 | 5.463231000 | 1.709175000  | 2.936305000  |
| 6 | 2.715905000 | 4.223788000  | -0.361857000 |
| 1 | 2.802697000 | 4.198672000  | -1.454657000 |
| 1 | 1.747365000 | 4.681245000  | -0.127786000 |
| 1 | 3.517389000 | 4.842204000  | 0.052286000  |
| 6 | 3.715096000 | 2.431379000  | 1.103077000  |
| 1 | 4.440879000 | 3.173733000  | 1.420266000  |

**[Fe(acac)<sub>2</sub>(OMe)<sub>2</sub> S = 5/2,-5/2 (overall S = 0)**

**E = -1856.59900167**

**G<sub>298K,D3,EtOH,1M</sub> = -1856.283126**

**<S<sup>2</sup>> = 4.945**

|    |              |              |              |
|----|--------------|--------------|--------------|
| 26 | -1.664609000 | -0.000052000 | 0.000300000  |
| 8  | -2.993673000 | -0.279894000 | 1.499493000  |
| 8  | -1.866940000 | -1.992575000 | -0.336436000 |
| 6  | -3.619460000 | -1.326007000 | 1.876398000  |
| 6  | -3.476041000 | -2.595455000 | 1.300424000  |
| 1  | -4.059259000 | -3.416434000 | 1.705527000  |
| 6  | -2.602449000 | -2.859219000 | 0.230375000  |
| 8  | -1.865723000 | 1.992838000  | 0.337196000  |
| 8  | -2.993242000 | 0.280735000  | -1.499019000 |
| 6  | -2.599398000 | 2.860174000  | -0.230856000 |
| 6  | -3.472327000 | 2.597116000  | -1.301662000 |
| 1  | -4.054007000 | 3.418736000  | -1.707678000 |
| 6  | -3.617207000 | 1.327581000  | -1.876996000 |
| 6  | -2.498118000 | -4.261436000 | -0.319774000 |
| 1  | -3.140528000 | -4.971935000 | 0.208225000  |
| 1  | -2.765946000 | -4.251861000 | -1.383233000 |
| 1  | -1.455873000 | -4.594799000 | -0.253173000 |
| 6  | -4.571228000 | -1.130675000 | 3.031912000  |
| 1  | -5.084371000 | -2.053680000 | 3.316560000  |
| 1  | -4.017383000 | -0.743965000 | 3.895974000  |
| 1  | -5.314879000 | -0.370960000 | 2.762726000  |
| 6  | -4.568537000 | 1.132921000  | -3.032982000 |
| 1  | -5.080254000 | 2.056471000  | -3.318433000 |

|    |              |              |              |
|----|--------------|--------------|--------------|
| 1  | -4.014689000 | 0.745013000  | -3.896505000 |
| 1  | -5.313385000 | 0.374358000  | -2.763856000 |
| 6  | -2.493674000 | 4.262570000  | 0.318618000  |
| 1  | -3.134771000 | 4.973619000  | -0.210235000 |
| 1  | -2.762265000 | 4.253917000  | 1.381890000  |
| 1  | -1.450946000 | 4.594538000  | 0.252576000  |
| 8  | -0.096063000 | 0.035597000  | 1.233773000  |
| 8  | -0.096117000 | -0.036202000 | -1.233259000 |
| 26 | 1.459790000  | -0.000355000 | 0.000194000  |
| 6  | -0.114438000 | 0.645339000  | 2.502948000  |
| 1  | -0.958002000 | 0.255515000  | 3.088649000  |
| 1  | 0.825245000  | 0.431099000  | 3.028646000  |
| 1  | -0.237054000 | 1.733673000  | 2.404604000  |
| 6  | -0.114536000 | -0.646610000 | -2.502133000 |
| 1  | 0.824893000  | -0.432154000 | -3.028172000 |
| 1  | -0.236594000 | -1.734953000 | -2.403197000 |
| 1  | -0.958485000 | -0.257502000 | -3.087750000 |
| 8  | 1.700941000  | -2.003396000 | 0.046673000  |
| 8  | 2.856742000  | -0.026725000 | -1.490766000 |
| 8  | 1.700974000  | 2.002758000  | -0.046260000 |
| 6  | 2.683857000  | -2.698659000 | -0.361451000 |
| 6  | 3.716665000  | -0.932763000 | -1.747595000 |
| 6  | 2.683882000  | 2.698023000  | 0.361861000  |
| 6  | 4.792284000  | -0.546781000 | -2.734959000 |
| 1  | 4.323992000  | -0.245295000 | -3.679811000 |
| 1  | 5.334399000  | 0.327093000  | -2.354170000 |
| 1  | 5.501489000  | -1.357078000 | -2.927194000 |
| 6  | 2.697382000  | -4.138258000 | 0.093571000  |
| 1  | 2.698255000  | -4.167386000 | 1.189689000  |
| 1  | 1.776368000  | -4.631390000 | -0.239430000 |
| 1  | 3.560366000  | -4.693212000 | -0.285501000 |
| 6  | 3.708083000  | -2.225545000 | -1.200938000 |
| 1  | 4.491052000  | -2.916730000 | -1.497283000 |
| 8  | 2.857425000  | 0.025790000  | 1.490490000  |
| 6  | 3.717238000  | 0.931926000  | 1.747359000  |
| 6  | 4.793207000  | 0.545833000  | 2.734308000  |
| 1  | 4.325236000  | 0.244061000  | 3.679228000  |
| 1  | 5.335300000  | -0.327884000 | 2.353131000  |
| 1  | 5.502372000  | 1.356168000  | 2.926527000  |
| 6  | 2.697274000  | 4.137691000  | -0.092975000 |
| 1  | 2.699412000  | 4.166919000  | -1.189097000 |
| 1  | 1.775652000  | 4.630368000  | 0.238989000  |
| 1  | 3.559601000  | 4.692984000  | 0.287091000  |
| 6  | 3.708294000  | 2.224862000  | 1.201097000  |
| 1  | 4.491218000  | 2.916086000  | 1.497468000  |

**Fe(acac)<sub>2</sub>(OMe) S = 3/2**

**E = -928.271325462**

**G<sub>298K,D3,EtOH,1M</sub> = -928.120782**

**<S<sup>2</sup>> = 3.813**

|    |             |              |              |
|----|-------------|--------------|--------------|
| 26 | 0.050582000 | -0.238101000 | -0.490360000 |
| 8  | 0.880212000 | 1.492389000  | -0.217325000 |

|   |              |              |              |
|---|--------------|--------------|--------------|
| 8 | 1.762555000  | -1.085763000 | -0.348584000 |
| 6 | 2.068148000  | 1.749100000  | 0.158344000  |
| 6 | 3.078662000  | 0.783761000  | 0.316210000  |
| 1 | 4.067313000  | 1.107534000  | 0.624416000  |
| 6 | 2.876353000  | -0.566078000 | 0.027136000  |
| 8 | -1.448593000 | 0.685775000  | -1.246255000 |
| 6 | -0.381104000 | -2.964132000 | -0.450532000 |
| 1 | -0.811539000 | -3.780354000 | -1.051245000 |
| 1 | 0.697469000  | -3.151235000 | -0.333518000 |
| 1 | -0.848776000 | -2.989142000 | 0.548127000  |

**[Fe(acac)<sub>2</sub>(OMe)]<sub>2</sub> S = 3/2,3/2 (overall S = 3)**

**E = -1856.58883102**

**G<sub>298K,D3,EtOH,1M</sub> = -1856.272921**

**<S<sup>2</sup>> = 12.064**

|    |              |              |              |
|----|--------------|--------------|--------------|
| 26 | -1.441907000 | 0.049683000  | 0.010509000  |
| 8  | -2.775530000 | -0.180549000 | 1.527509000  |
| 8  | -1.603702000 | -1.987419000 | -0.186607000 |
| 6  | -3.552157000 | -1.155343000 | 1.797731000  |
| 6  | -3.487603000 | -2.419118000 | 1.194037000  |
| 1  | -4.200216000 | -3.177564000 | 1.503198000  |
| 6  | -2.501104000 | -2.769936000 | 0.253866000  |
| 8  | -1.760989000 | 2.026847000  | 0.193279000  |
| 8  | -2.873334000 | 0.099289000  | -1.448000000 |
| 6  | -2.696606000 | 2.751689000  | -0.267271000 |
| 6  | -3.669345000 | 2.322721000  | -1.187841000 |
| 1  | -4.415526000 | 3.038348000  | -1.518927000 |
| 6  | -3.686261000 | 1.035400000  | -1.744729000 |
| 6  | -2.461746000 | -4.180341000 | -0.287581000 |
| 1  | -3.242040000 | -4.818718000 | 0.136910000  |
| 1  | -2.573607000 | -4.148937000 | -1.378094000 |
| 1  | -1.480221000 | -4.621277000 | -0.077304000 |
| 6  | -4.588886000 | -0.885765000 | 2.862282000  |
| 1  | -5.215238000 | -1.757624000 | 3.072247000  |
| 1  | -4.087496000 | -0.569495000 | 3.784967000  |
| 1  | -5.225476000 | -0.051532000 | 2.543309000  |
| 6  | -4.721827000 | 0.688961000  | -2.788610000 |
| 1  | -5.400047000 | 1.519803000  | -3.003741000 |
| 1  | -4.215044000 | 0.389177000  | -3.714013000 |
| 1  | -5.304234000 | -0.175526000 | -2.447929000 |
| 6  | -2.713538000 | 4.181498000  | 0.219260000  |
| 1  | -3.581701000 | 4.739964000  | -0.142648000 |
| 1  | -2.702465000 | 4.190003000  | 1.315196000  |
| 1  | -1.799679000 | 4.686064000  | -0.117628000 |
| 8  | 0.163374000  | 0.073947000  | 1.236832000  |
| 8  | 0.048424000  | 0.015148000  | -1.255820000 |
| 26 | 1.565698000  | 0.055048000  | -0.033441000 |
| 6  | 0.259267000  | -0.681364000 | 2.422335000  |
| 1  | -0.683351000 | -0.579716000 | 2.975070000  |
| 1  | 0.440983000  | -1.742635000 | 2.202889000  |
| 1  | 1.084519000  | -0.305537000 | 3.041807000  |
| 6  | 0.085420000  | -0.721238000 | -2.450791000 |

|   |              |              |              |
|---|--------------|--------------|--------------|
| 1 | 0.897127000  | -0.349321000 | -3.091522000 |
| 1 | 0.238786000  | -1.792775000 | -2.253578000 |
| 1 | -0.873168000 | -0.598849000 | -2.972491000 |
| 8 | 1.643209000  | -1.845359000 | 0.091500000  |
| 8 | 2.873003000  | 0.114592000  | -1.418170000 |
| 8 | 1.438593000  | 1.938345000  | -0.212315000 |
| 6 | 2.630971000  | -2.551752000 | -0.291455000 |
| 6 | 3.724009000  | -0.811197000 | -1.649671000 |
| 6 | 2.237972000  | 2.763430000  | 0.331108000  |
| 6 | 4.798623000  | -0.446422000 | -2.642754000 |
| 1 | 4.332913000  | -0.166021000 | -3.595167000 |
| 1 | 5.344060000  | 0.433509000  | -2.281640000 |
| 1 | 5.503522000  | -1.264567000 | -2.814719000 |
| 6 | 2.582787000  | -3.997190000 | 0.136885000  |
| 1 | 2.574358000  | -4.049460000 | 1.232191000  |
| 1 | 1.648074000  | -4.448812000 | -0.215226000 |
| 1 | 3.429239000  | -4.574742000 | -0.244714000 |
| 6 | 3.690738000  | -2.094571000 | -1.091881000 |
| 1 | 4.464400000  | -2.801254000 | -1.374896000 |
| 8 | 2.944551000  | 0.079056000  | 1.272932000  |
| 6 | 3.568559000  | 1.135342000  | 1.636583000  |
| 6 | 4.674266000  | 0.894686000  | 2.635084000  |
| 1 | 4.253601000  | 0.445272000  | 3.542873000  |
| 1 | 5.389673000  | 0.174147000  | 2.221444000  |
| 1 | 5.201070000  | 1.814613000  | 2.903203000  |
| 6 | 1.975258000  | 4.209260000  | -0.010796000 |
| 1 | 1.987716000  | 4.331727000  | -1.099878000 |
| 1 | 0.969814000  | 4.477128000  | 0.334133000  |
| 1 | 2.704989000  | 4.886782000  | 0.441303000  |
| 6 | 3.291142000  | 2.435917000  | 1.204189000  |
| 1 | 3.895670000  | 3.245672000  | 1.600589000  |

**Fe(acac)<sub>2</sub>(OMe) S = 1/2**

**E = -928.26038061**

**G<sub>298K,D3,EtOH,1M</sub> = -928.107934**

**<S<sup>2</sup>> = 1.093**

|    |              |              |              |
|----|--------------|--------------|--------------|
| 26 | -0.036238000 | -0.358223000 | -0.639093000 |
| 8  | 0.596089000  | 1.460982000  | -0.651280000 |
| 8  | 1.737647000  | -0.999546000 | -0.325014000 |
| 6  | 1.695115000  | 1.888149000  | -0.159077000 |
| 6  | 2.736085000  | 1.067763000  | 0.293394000  |
| 1  | 3.634332000  | 1.533696000  | 0.685605000  |
| 6  | 2.720234000  | -0.325521000 | 0.131151000  |
| 8  | -1.686055000 | 0.320474000  | -1.236502000 |
| 8  | -0.410162000 | -0.395419000 | 1.187303000  |
| 6  | -2.672319000 | 0.549097000  | -0.467826000 |
| 6  | -2.663188000 | 0.367237000  | 0.929479000  |
| 1  | -3.573089000 | 0.595451000  | 1.475160000  |
| 6  | -1.562404000 | -0.081071000 | 1.663178000  |
| 6  | 3.946290000  | -1.137736000 | 0.462855000  |
| 1  | 4.770659000  | -0.520167000 | 0.829589000  |
| 1  | 3.689806000  | -1.887380000 | 1.220858000  |

|   |              |              |              |
|---|--------------|--------------|--------------|
| 1 | 4.273234000  | -1.682807000 | -0.430664000 |
| 6 | 1.843513000  | 3.387670000  | -0.127114000 |
| 1 | 2.786641000  | 3.706394000  | 0.325357000  |
| 1 | 1.785191000  | 3.778839000  | -1.150133000 |
| 1 | 1.006141000  | 3.823975000  | 0.430195000  |
| 6 | -1.663519000 | -0.232736000 | 3.159608000  |
| 1 | -2.647085000 | 0.055833000  | 3.539381000  |
| 1 | -1.462584000 | -1.275127000 | 3.434177000  |
| 1 | -0.894470000 | 0.381806000  | 3.642309000  |
| 6 | -3.917906000 | 1.049614000  | -1.152373000 |
| 1 | -4.723196000 | 1.269164000  | -0.446361000 |
| 1 | -3.679551000 | 1.953467000  | -1.724858000 |
| 1 | -4.261921000 | 0.294646000  | -1.869368000 |
| 8 | -0.538184000 | -1.971535000 | -1.145375000 |
| 6 | -0.055124000 | -3.137554000 | -0.541240000 |
| 1 | -0.582718000 | -3.998278000 | -0.979509000 |
| 1 | 1.026266000  | -3.267977000 | -0.696672000 |
| 1 | -0.240815000 | -3.136833000 | 0.546080000  |

**[Fe(acac)<sub>2</sub>(OMe)<sub>2</sub> S = 1/2,1/2 (overall S = 1)**

**E = -1856.58004998**

**G<sub>298K,D3,EtOH,1M</sub> = -1856.260270**

**<S<sup>2</sup>> = 2.114**

|    |              |              |              |
|----|--------------|--------------|--------------|
| 26 | -1.468055000 | 0.034379000  | 0.021661000  |
| 8  | -2.771038000 | 0.078851000  | 1.424200000  |
| 8  | -1.506723000 | -1.875473000 | -0.055621000 |
| 6  | -3.608030000 | -0.855559000 | 1.667044000  |
| 6  | -3.557655000 | -2.143017000 | 1.119480000  |
| 1  | -4.321381000 | -2.858699000 | 1.407036000  |
| 6  | -2.487247000 | -2.590733000 | 0.328157000  |
| 8  | -1.438258000 | 1.925794000  | 0.183328000  |
| 8  | -2.849613000 | -0.024640000 | -1.282646000 |
| 6  | -2.282725000 | 2.699310000  | -0.364587000 |
| 6  | -3.310221000 | 2.312084000  | -1.245197000 |
| 1  | -3.954613000 | 3.086726000  | -1.649177000 |
| 6  | -3.518279000 | 0.996458000  | -1.667266000 |
| 6  | -2.416351000 | -4.040524000 | -0.084255000 |
| 1  | -3.263666000 | -4.622910000 | 0.288176000  |
| 1  | -2.387463000 | -4.103888000 | -1.178560000 |
| 1  | -1.484334000 | -4.479852000 | 0.290264000  |
| 6  | -4.685731000 | -0.498434000 | 2.660186000  |
| 1  | -5.377568000 | -1.325658000 | 2.842050000  |
| 1  | -4.221736000 | -0.201718000 | 3.608506000  |
| 1  | -5.245634000 | 0.369587000  | 2.292401000  |
| 6  | -4.602255000 | 0.690947000  | -2.672125000 |
| 1  | -5.172417000 | 1.580722000  | -2.953337000 |
| 1  | -4.152022000 | 0.255599000  | -3.572606000 |
| 1  | -5.284049000 | -0.060923000 | -2.257464000 |
| 6  | -2.111230000 | 4.161849000  | -0.030712000 |
| 1  | -2.956518000 | 4.768772000  | -0.367756000 |
| 1  | -1.983991000 | 4.275104000  | 1.051205000  |
| 1  | -1.197029000 | 4.532431000  | -0.510372000 |

|    |              |              |              |    |              |              |              |
|----|--------------|--------------|--------------|----|--------------|--------------|--------------|
| 8  | 0.074079000  | 0.071469000  | 1.235209000  | 8  | 2.847346000  | -0.021744000 | 1.285301000  |
| 8  | -0.074132000 | 0.071733000  | -1.235281000 | 6  | 2.284078000  | 2.699917000  | 0.359581000  |
| 26 | 1.468000000  | 0.034361000  | -0.021678000 | 6  | 3.313410000  | 2.313744000  | 1.238499000  |
| 6  | 0.099586000  | -0.805621000 | 2.338057000  | 1  | 3.960006000  | 3.088466000  | 1.638779000  |
| 1  | -0.746171000 | -0.560299000 | 2.994208000  | 6  | 3.518822000  | 0.999274000  | 1.665368000  |
| 1  | 0.032368000  | -1.856820000 | 2.026730000  | 6  | 2.421611000  | -4.040703000 | 0.088823000  |
| 1  | 1.038750000  | -0.662747000 | 2.887988000  | 1  | 3.270180000  | -4.622296000 | -0.282006000 |
| 6  | -0.099519000 | -0.805598000 | -2.337974000 | 1  | 2.391067000  | -4.103587000 | 1.183112000  |
| 1  | 0.746221000  | -0.560290000 | -2.994148000 | 1  | 1.490665000  | -4.481286000 | -0.286896000 |
| 1  | -0.032193000 | -1.856718000 | -2.026437000 | 6  | 4.691528000  | -0.497681000 | -2.653822000 |
| 1  | -1.038693000 | -0.662922000 | -2.887940000 | 1  | 5.384312000  | -1.324450000 | -2.834157000 |
| 8  | 1.506791000  | -1.875491000 | 0.055438000  | 1  | 4.228840000  | -0.201789000 | -3.603034000 |
| 8  | 2.770939000  | 0.079027000  | -1.424202000 | 1  | 5.250163000  | 0.370943000  | -2.285533000 |
| 8  | 1.438132000  | 1.925776000  | -0.183002000 | 6  | 4.602547000  | 0.695008000  | 2.670831000  |
| 6  | 2.487354000  | -2.590658000 | -0.328417000 | 1  | 5.174869000  | 1.584540000  | 2.948385000  |
| 6  | 3.608031000  | -0.855277000 | -1.667122000 | 1  | 4.151691000  | 0.264155000  | 3.573155000  |
| 6  | 2.282633000  | 2.699251000  | 0.364938000  | 1  | 5.282390000  | -0.060022000 | 2.258722000  |
| 6  | 4.685790000  | -0.497903000 | -2.660106000 | 6  | 2.113394000  | 4.161687000  | 0.022030000  |
| 1  | 4.221858000  | -0.200656000 | -3.608288000 | 1  | 2.959391000  | 4.768888000  | 0.356781000  |
| 1  | 5.245853000  | 0.369842000  | -2.291906000 | 1  | 1.985431000  | 4.272143000  | -1.060103000 |
| 1  | 5.377487000  | -1.325164000 | -2.842335000 | 1  | 1.199786000  | 4.534235000  | 0.501280000  |
| 6  | 2.416578000  | -4.040477000 | 0.083910000  | 8  | -0.070448000 | 0.067582000  | -1.234504000 |
| 1  | 2.387329000  | -4.103895000 | 1.178200000  | 8  | 0.070458000  | 0.067595000  | 1.234450000  |
| 1  | 1.484772000  | -4.479969000 | -0.290949000 | 26 | -1.468333000 | 0.033939000  | 0.020579000  |
| 1  | 3.264120000  | -4.622695000 | -0.288272000 | 6  | -0.095132000 | -0.810415000 | -2.336657000 |
| 6  | 3.557716000  | -2.142807000 | -1.119729000 | 1  | 0.749355000  | -0.563640000 | -2.993939000 |
| 1  | 4.321501000  | -2.858407000 | -1.407333000 | 1  | -0.025152000 | -1.861156000 | -2.024536000 |
| 8  | 2.849641000  | -0.024803000 | 1.282587000  | 1  | -1.035128000 | -0.669854000 | -2.885734000 |
| 6  | 3.518205000  | 0.996265000  | 1.667419000  | 6  | 0.095154000  | -0.810254000 | 2.336715000  |
| 6  | 4.602129000  | 0.690678000  | 2.672317000  | 1  | -0.749355000 | -0.563427000 | 2.993949000  |
| 1  | 4.151788000  | 0.255687000  | 3.572920000  | 1  | 0.025217000  | -1.861040000 | 2.024725000  |
| 1  | 5.283693000  | -0.061488000 | 2.257826000  | 1  | 1.035135000  | -0.669591000 | 2.885790000  |
| 1  | 5.172537000  | 1.580364000  | 2.953316000  | 8  | -1.509342000 | -1.876759000 | -0.057747000 |
| 6  | 2.111390000  | 4.161710000  | 0.030625000  | 8  | -2.774034000 | 0.078429000  | 1.421569000  |
| 1  | 1.990549000  | 4.275148000  | -1.052043000 | 8  | -1.436922000 | 1.925758000  | 0.183161000  |
| 1  | 1.193748000  | 4.530915000  | 0.504669000  | 6  | -2.491355000 | -2.590993000 | 0.324235000  |
| 1  | 2.953922000  | 4.769581000  | 0.372786000  | 6  | -3.612444000 | -0.855126000 | 1.662241000  |
| 6  | 3.310075000  | 2.311968000  | 1.245570000  | 6  | -2.284104000 | 2.699884000  | -0.359651000 |
| 1  | 3.954421000  | 3.086567000  | 1.649693000  | 6  | -4.691529000 | -0.497619000 | 2.653808000  |
|    |              |              |              | 1  | -4.228845000 | -0.201751000 | 3.603030000  |
|    |              |              |              | 1  | -5.250130000 | 0.371026000  | 2.285519000  |
|    |              |              |              | 1  | -5.384340000 | -1.324368000 | 2.834128000  |
|    |              |              |              | 6  | -2.421574000 | -4.040720000 | -0.088704000 |
|    |              |              |              | 1  | -2.391045000 | -4.103636000 | -1.182992000 |
|    |              |              |              | 1  | -1.490617000 | -4.481280000 | 0.287014000  |
|    |              |              |              | 1  | -3.270131000 | -4.622311000 | 0.282154000  |
|    |              |              |              | 6  | -3.562560000 | -2.142382000 | 1.113902000  |
|    |              |              |              | 1  | -4.327559000 | -2.857350000 | 1.399869000  |
|    |              |              |              | 8  | -2.847334000 | -0.021798000 | -1.285320000 |
|    |              |              |              | 6  | -3.518835000 | 0.999200000  | -1.665395000 |
|    |              |              |              | 6  | -4.602572000 | 0.694896000  | -2.670832000 |
|    |              |              |              | 1  | -4.151740000 | 0.263916000  | -3.573106000 |

**[Fe(acac)<sub>2</sub>(OMe)<sub>2</sub> S = 1/2,-1/2 (overall S = 0)**  
**E = -1856.58004925**  
**G<sub>298K,D3,EtOH,IM</sub> = -1856.259205**  
**<S<sup>2</sup>> = 1.123**

|    |             |              |              |
|----|-------------|--------------|--------------|
| 26 | 1.468345000 | 0.033951000  | -0.020602000 |
| 8  | 2.774034000 | 0.078399000  | -1.421599000 |
| 8  | 1.509371000 | -1.876747000 | 0.057816000  |
| 6  | 3.612448000 | -0.855161000 | -1.662241000 |
| 6  | 3.562572000 | -2.142399000 | -1.113859000 |
| 1  | 4.327570000 | -2.857373000 | -1.399810000 |
| 6  | 2.491380000 | -2.590988000 | -0.324160000 |
| 8  | 1.436926000 | 1.925769000  | -0.183245000 |

|   |              |              |              |   |              |             |              |
|---|--------------|--------------|--------------|---|--------------|-------------|--------------|
| 1 | -5.282467000 | -0.060046000 | -2.258645000 | 1 | -1.199384000 | 4.534009000 | -0.500486000 |
| 1 | -5.174840000 | 1.584434000  | -2.948481000 | 1 | -2.959096000 | 4.768970000 | -0.357519000 |
| 6 | -2.113481000 | 4.161646000  | -0.022037000 | 6 | -3.313439000 | 2.313682000 | -1.238551000 |
| 1 | -1.986433000 | 4.272129000  | 1.060207000  | 1 | -3.960053000 | 3.088385000 | -1.638837000 |

## 2.B FeH(acac)<sub>2</sub> (monomers vs. dimers)

### B1. Energy diagram and views of the optimized geometries

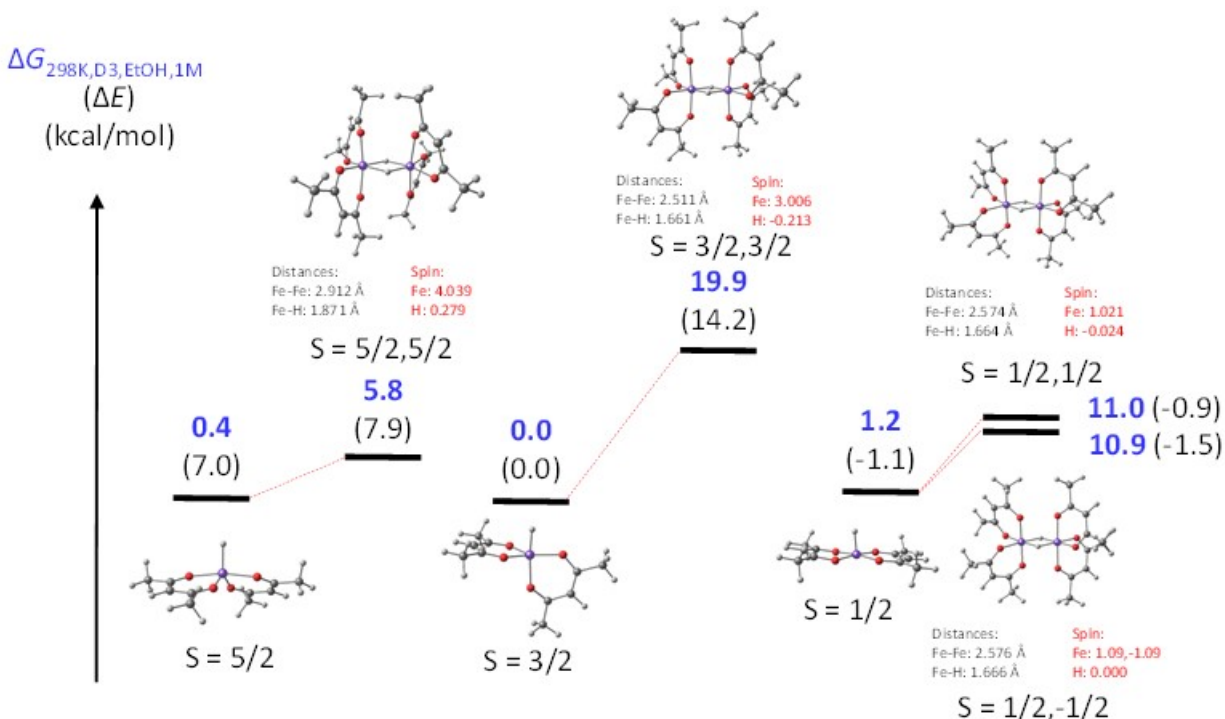

### B2. Cartesian coordinates and energies (gas-phase E and D3-corrected G in EtOH at 298 K, in hartrees) of the optimized geometries.

|                                                  |              |              |              |   |              |              |              |
|--------------------------------------------------|--------------|--------------|--------------|---|--------------|--------------|--------------|
| <b>FeH(acac)<sub>2</sub> S = 1/2</b>             |              |              |              | 8 | 1.275477000  | 1.367510000  | 0.013952000  |
| <b>E = -813.823991991</b>                        |              |              |              | 6 | 2.548536000  | 1.230073000  | -0.010780000 |
| <b>G<sub>298K,D3,EtOH,1M</sub> = -813.689331</b> |              |              |              | 6 | 3.323998000  | 2.521448000  | -0.023221000 |
| <b>&lt;S<sup>2</sup>&gt; = 0.790</b>             |              |              |              | 6 | 3.219225000  | 0.000064000  | -0.020423000 |
| 26                                               | 0.001647000  | -0.000044000 | 0.039614000  | 1 | 2.998136000  | 3.135161000  | -0.871288000 |
| 8                                                | 1.275570000  | -1.367524000 | 0.013841000  | 1 | -2.972122000 | 3.173405000  | 0.768198000  |
| 6                                                | 2.548623000  | -1.229992000 | -0.010535000 | 1 | -3.127371000 | 3.037954000  | -0.982323000 |
| 6                                                | 3.324190000  | -2.521311000 | -0.022203000 | 1 | 4.403365000  | 2.358818000  | -0.087821000 |
| 8                                                | -1.276242000 | 1.360803000  | -0.131030000 | 1 | -4.398679000 | 2.356185000  | 0.068927000  |
| 6                                                | -2.543190000 | 1.228239000  | -0.004878000 | 1 | 3.099182000  | 3.089268000  | 0.887820000  |
| 6                                                | -3.206965000 | -0.000045000 | 0.113281000  | 1 | 4.304605000  | 0.000101000  | -0.029630000 |
| 6                                                | -2.543181000 | -1.228246000 | -0.005454000 | 1 | -4.288705000 | -0.000071000 | 0.202760000  |
| 8                                                | -1.276251000 | -1.360672000 | -0.132166000 | 1 | 2.999335000  | -3.134977000 | -0.870695000 |
| 6                                                | -3.322335000 | 2.516907000  | -0.037224000 | 1 | -4.398589000 | -2.356334000 | 0.068207000  |
| 6                                                | -3.322208000 | -2.516979000 | -0.037685000 | 1 | 4.403617000  | -2.358605000 | -0.085599000 |

|   |              |              |              |
|---|--------------|--------------|--------------|
| 1 | -3.126955000 | -3.038272000 | -0.982581000 |
| 1 | 3.098375000  | -3.089225000 | 0.888529000  |
| 1 | -2.972125000 | -3.173215000 | 0.768017000  |
| 1 | -0.213470000 | -0.000957000 | 1.465491000  |

**FeH(acac)<sub>2</sub> S = 3/2**  
**E = -813.822212133**

**G<sub>298K,D3,EtOH,1M</sub> = -813.691295**  
**<S<sup>2</sup>> = 3.879**

|    |              |              |              |
|----|--------------|--------------|--------------|
| 26 | -0.041408000 | -0.631042000 | -0.001393000 |
| 8  | -1.786635000 | -1.388792000 | -0.002610000 |
| 6  | -2.926095000 | -0.782044000 | -0.001184000 |
| 6  | -4.111678000 | -1.710730000 | -0.002938000 |
| 8  | 1.258583000  | -0.296114000 | -1.400791000 |
| 6  | 2.497203000  | -0.025846000 | -1.241937000 |
| 6  | 3.139609000  | 0.100830000  | 0.000465000  |
| 6  | 2.496839000  | -0.030490000 | 1.242200000  |
| 8  | 1.258237000  | -0.301637000 | 1.399660000  |
| 6  | 3.279981000  | 0.168548000  | -2.516202000 |
| 6  | 3.279096000  | 0.159707000  | 2.517420000  |
| 8  | -0.824969000 | 1.189632000  | 0.001952000  |
| 6  | -2.046436000 | 1.524010000  | 0.002828000  |
| 6  | -2.334855000 | 3.004564000  | 0.004832000  |
| 6  | -3.113704000 | 0.598068000  | 0.001556000  |
| 1  | -1.866203000 | 3.462877000  | 0.883807000  |
| 1  | 3.218503000  | -0.743304000 | -3.122369000 |
| 1  | 2.823603000  | 0.975057000  | -3.102500000 |
| 1  | -3.405879000 | 3.225446000  | 0.010322000  |
| 1  | 4.330673000  | 0.408091000  | -2.330873000 |
| 1  | -1.875632000 | 3.463284000  | -0.878973000 |
| 1  | -4.130044000 | 0.978772000  | 0.002530000  |
| 1  | 4.200257000  | 0.331794000  | 0.001050000  |
| 1  | -4.061844000 | -2.364693000 | 0.876046000  |
| 1  | 4.330315000  | 0.397902000  | 2.333340000  |
| 1  | -5.063818000 | -1.173280000 | -0.000411000 |
| 1  | 2.823748000  | 0.965812000  | 3.105102000  |
| 1  | -4.063522000 | -2.359116000 | -0.886161000 |
| 1  | 3.215546000  | -0.753296000 | 3.121602000  |
| 1  | 0.399407000  | -2.072651000 | -0.004221000 |

**FeH(acac)<sub>2</sub> S = 5/2**  
**E = -813.810985212**

**G<sub>298K,D3,EtOH,1M</sub> = -813.690720**  
**<S<sup>2</sup>> = 8.759**

|    |              |              |              |
|----|--------------|--------------|--------------|
| 1  | -0.001879000 | 0.000445000  | -2.322085000 |
| 26 | -0.000114000 | 0.000025000  | -0.649398000 |
| 8  | -1.540442000 | -1.266401000 | -0.459832000 |
| 6  | -2.746322000 | -1.041246000 | -0.117615000 |
| 6  | -3.689808000 | -2.210822000 | -0.230076000 |
| 8  | 1.540574000  | 1.265911000  | -0.461035000 |
| 6  | 2.746323000  | 1.041210000  | -0.117974000 |
| 6  | 3.216256000  | -0.201225000 | 0.345408000  |

|   |              |              |              |
|---|--------------|--------------|--------------|
| 6 | 2.396716000  | -1.329550000 | 0.471048000  |
| 8 | 1.149549000  | -1.361898000 | 0.179832000  |
| 6 | 3.689475000  | 2.211079000  | -0.229995000 |
| 6 | 2.966894000  | -2.626870000 | 0.982060000  |
| 8 | -1.148956000 | 1.361356000  | 0.181577000  |
| 6 | -2.396516000 | 1.329543000  | 0.471329000  |
| 6 | -2.966713000 | 2.627123000  | 0.981640000  |
| 6 | -3.216287000 | 0.201500000  | 0.345011000  |
| 1 | -2.409401000 | 2.941420000  | 1.872225000  |
| 1 | 3.717691000  | 2.549303000  | -1.272883000 |
| 1 | 3.301575000  | 3.045779000  | 0.365819000  |
| 1 | -4.029764000 | 2.552248000  | 1.226280000  |
| 1 | 4.703754000  | 1.969108000  | 0.099187000  |
| 1 | -2.822379000 | 3.406379000  | 0.223605000  |
| 1 | -4.261617000 | 0.289134000  | 0.623257000  |
| 1 | 4.261379000  | -0.288517000 | 0.624534000  |
| 1 | -3.301071000 | -3.046581000 | 0.363666000  |
| 1 | 4.029757000  | -2.551675000 | 1.227416000  |
| 1 | -4.703569000 | -1.969235000 | 0.100977000  |
| 1 | 2.409059000  | -2.941036000 | 1.872366000  |
| 1 | -3.719714000 | -2.547217000 | -1.273528000 |
| 1 | 2.823244000  | -3.406384000 | 0.224163000  |

**[FeH(acac)<sub>2</sub>]<sub>2</sub> S = 1/2,1/2 (overall S = 1)**  
**E = -1627.64584795**

**G<sub>298K,D3,EtOH,1M</sub> = -1627.365047**  
**<S<sup>2</sup>> = 2.103**

|    |              |              |              |
|----|--------------|--------------|--------------|
| 26 | -1.287207000 | -0.000019000 | 0.000009000  |
| 8  | -2.618375000 | 0.089256000  | -1.350358000 |
| 8  | -1.302211000 | 1.870900000  | 0.307612000  |
| 6  | -3.403540000 | 1.079483000  | -1.541649000 |
| 6  | -3.316477000 | 2.311567000  | -0.885489000 |
| 1  | -4.046221000 | 3.078383000  | -1.125990000 |
| 6  | -2.253428000 | 2.645279000  | -0.029545000 |
| 8  | -1.302245000 | -1.870938000 | -0.307588000 |
| 8  | -2.618361000 | -0.089272000 | 1.350391000  |
| 6  | -2.253468000 | -2.645303000 | 0.029590000  |
| 6  | -3.316545000 | -2.311546000 | 0.885480000  |
| 1  | -4.046381000 | -3.078305000 | 1.125882000  |
| 6  | -3.403535000 | -1.079489000 | 1.541698000  |
| 6  | -2.152443000 | 4.047475000  | 0.519011000  |
| 1  | -3.057353000 | 4.633006000  | 0.332533000  |
| 1  | -1.957677000 | 4.003205000  | 1.595976000  |
| 1  | -1.300325000 | 4.557466000  | 0.053080000  |
| 6  | -4.461206000 | 0.851542000  | -2.592662000 |
| 1  | -5.135275000 | 1.706606000  | -2.694864000 |
| 1  | -3.976846000 | 0.659784000  | -3.557815000 |
| 1  | -5.042078000 | -0.043072000 | -2.339831000 |
| 6  | -4.461300000 | -0.851473000 | 2.592595000  |
| 1  | -5.135437000 | -1.706491000 | 2.694732000  |
| 1  | -3.977021000 | -0.659742000 | 3.557792000  |
| 1  | -5.042093000 | 0.043178000  | 2.339705000  |

|    |              |              |              |    |              |              |              |
|----|--------------|--------------|--------------|----|--------------|--------------|--------------|
| 6  | -2.152647000 | -4.047439000 | -0.519148000 | 6  | -3.403367000 | -1.057742000 | 1.565015000  |
| 1  | -3.057619000 | -4.632896000 | -0.332738000 | 6  | -2.159000000 | 4.049826000  | 0.465650000  |
| 1  | -1.957880000 | -4.003067000 | -1.596111000 | 1  | -3.062521000 | 4.633612000  | 0.267522000  |
| 1  | -1.300582000 | -4.557568000 | -0.053277000 | 1  | -1.970359000 | 4.017728000  | 1.544145000  |
| 26 | 1.287207000  | -0.000017000 | -0.000013000 | 1  | -1.303931000 | 4.553739000  | -0.001474000 |
| 8  | 1.302218000  | 1.870890000  | -0.307685000 | 6  | -4.458050000 | 0.819555000  | -2.617039000 |
| 8  | 2.618377000  | 0.089303000  | 1.350349000  | 1  | -5.132283000 | 1.673181000  | -2.729783000 |
| 8  | 1.302237000  | -1.870924000 | 0.307658000  | 1  | -3.970579000 | 0.618652000  | -3.578778000 |
| 6  | 2.253436000  | 2.645280000  | 0.029444000  | 1  | -5.039219000 | -0.072923000 | -2.357439000 |
| 6  | 3.403546000  | 1.079534000  | 1.541603000  | 6  | -4.458066000 | -0.819691000 | 2.616905000  |
| 6  | 2.253453000  | -2.645308000 | -0.029499000 | 1  | -5.132230000 | -1.673372000 | 2.729645000  |
| 6  | 4.461208000  | 0.851630000  | 2.592629000  | 1  | -3.970622000 | -0.618745000 | 3.578649000  |
| 1  | 3.976845000  | 0.659901000  | 3.557786000  | 1  | -5.039305000 | 0.072739000  | 2.357297000  |
| 1  | 5.042084000  | -0.042990000 | 2.339828000  | 6  | -2.158657000 | -4.049815000 | -0.465662000 |
| 1  | 5.135274000  | 1.706699000  | 2.694806000  | 1  | -3.062122000 | -4.633687000 | -0.267533000 |
| 6  | 2.152447000  | 4.047459000  | -0.519151000 | 1  | -1.969994000 | -4.017740000 | -1.544154000 |
| 1  | 1.957682000  | 4.003157000  | -1.596115000 | 1  | -1.303546000 | -4.553623000 | 0.001501000  |
| 1  | 1.300327000  | 4.557461000  | -0.053236000 | 26 | 1.288049000  | 0.000045000  | 0.000026000  |
| 1  | 3.057355000  | 4.632998000  | -0.332689000 | 8  | 1.306697000  | 1.872111000  | -0.282107000 |
| 6  | 3.316483000  | 2.311597000  | 0.885403000  | 8  | 2.620228000  | 0.069445000  | 1.358775000  |
| 1  | 4.046225000  | 3.078422000  | 1.125882000  | 8  | 1.306555000  | -1.872023000 | 0.282154000  |
| 8  | 2.618358000  | -0.089327000 | -1.350393000 | 6  | 2.257963000  | 2.641602000  | 0.067314000  |
| 6  | 3.403523000  | -1.079558000 | -1.541669000 | 6  | 3.403381000  | 1.057749000  | 1.565101000  |
| 6  | 4.461309000  | -0.851575000 | -2.592553000 | 6  | 2.257776000  | -2.641583000 | -0.067234000 |
| 1  | 3.977045000  | -0.659876000 | -3.557764000 | 6  | 4.458057000  | 0.819653000  | 2.617005000  |
| 1  | 5.042097000  | 0.043084000  | -2.339683000 | 1  | 3.970589000  | 0.618783000  | 3.578753000  |
| 1  | 5.135447000  | -1.706597000 | -2.694650000 | 1  | 5.039227000  | -0.072834000 | 2.357435000  |
| 6  | 2.152644000  | -4.047415000 | 0.519316000  | 1  | 5.132290000  | 1.673283000  | 2.729716000  |
| 1  | 1.957861000  | -4.002988000 | 1.596274000  | 6  | 2.159006000  | 4.049806000  | -0.465806000 |
| 1  | 1.300593000  | -4.557579000 | 0.053459000  | 1  | 1.970364000  | 4.017665000  | -1.544300000 |
| 1  | 3.057626000  | -4.632870000 | 0.332950000  | 1  | 1.303939000  | 4.553740000  | 0.001299000  |
| 6  | 3.316534000  | -2.311585000 | -0.885397000 | 1  | 3.062529000  | 4.633598000  | -0.267704000 |
| 1  | 4.046378000  | -3.078350000 | -1.125757000 | 6  | 3.317688000  | 2.297735000  | 0.922859000  |
| 1  | 0.000008000  | -0.000008000 | 1.054801000  | 1  | 4.046236000  | 3.062105000  | 1.174525000  |
| 1  | -0.000008000 | -0.000046000 | -1.054806000 | 8  | 2.620273000  | -0.069448000 | -1.358674000 |

**[FeH(acac)<sub>2</sub>]<sub>2</sub> S = 1/2,-1/2 (overall S = 0)**

**E = -1627.64681213**

**G<sub>298K,D3,EtOH,IM</sub> = -1627.365163**

**<S<sup>2</sup>> = 1.265**

|    |              |              |              |
|----|--------------|--------------|--------------|
| 26 | -1.288047000 | 0.000046000  | -0.000022000 |
| 8  | -2.620225000 | 0.069395000  | -1.358775000 |
| 8  | -1.306695000 | 1.872123000  | 0.282037000  |
| 6  | -3.403378000 | 1.057691000  | -1.565140000 |
| 6  | -3.317684000 | 2.297702000  | -0.922947000 |
| 1  | -4.046230000 | 3.062064000  | -1.174644000 |
| 6  | -2.257960000 | 2.641601000  | -0.067414000 |
| 8  | -1.306555000 | -1.872033000 | -0.282077000 |
| 8  | -2.620273000 | -0.069393000 | 1.358679000  |
| 6  | -2.257780000 | -2.641577000 | 0.067336000  |
| 6  | -3.317549000 | -2.297758000 | 0.922845000  |
| 1  | -4.046029000 | -3.062182000 | 1.174547000  |

|    |              |              |              |
|----|--------------|--------------|--------------|
| 6  | -3.403367000 | -1.057742000 | 1.565015000  |
| 6  | -2.159000000 | 4.049826000  | 0.465650000  |
| 1  | -3.062521000 | 4.633612000  | 0.267522000  |
| 1  | -1.970359000 | 4.017728000  | 1.544145000  |
| 1  | -1.303931000 | 4.553739000  | -0.001474000 |
| 6  | -4.458050000 | 0.819555000  | -2.617039000 |
| 1  | -5.132283000 | 1.673181000  | -2.729783000 |
| 1  | -3.970579000 | 0.618652000  | -3.578778000 |
| 1  | -5.039219000 | -0.072923000 | -2.357439000 |
| 6  | -4.458066000 | -0.819691000 | 2.616905000  |
| 1  | -5.132230000 | -1.673372000 | 2.729645000  |
| 1  | -3.970622000 | -0.618745000 | 3.578649000  |
| 1  | -5.039305000 | 0.072739000  | 2.357297000  |
| 6  | -2.158657000 | -4.049815000 | -0.465662000 |
| 1  | -3.062122000 | -4.633687000 | -0.267533000 |
| 1  | -1.969994000 | -4.017740000 | -1.544154000 |
| 1  | -1.303546000 | -4.553623000 | 0.001501000  |
| 26 | 1.288049000  | 0.000045000  | 0.000026000  |
| 8  | 1.306697000  | 1.872111000  | -0.282107000 |
| 8  | 2.620228000  | 0.069445000  | 1.358775000  |
| 8  | 1.306555000  | -1.872023000 | 0.282154000  |
| 6  | 2.257963000  | 2.641602000  | 0.067314000  |
| 6  | 3.403381000  | 1.057749000  | 1.565101000  |
| 6  | 2.257776000  | -2.641583000 | -0.067234000 |
| 6  | 4.458057000  | 0.819653000  | 2.617005000  |
| 1  | 3.970589000  | 0.618783000  | 3.578753000  |
| 1  | 5.039227000  | -0.072834000 | 2.357435000  |
| 1  | 5.132290000  | 1.673283000  | 2.729716000  |
| 6  | 2.159006000  | 4.049806000  | -0.465806000 |
| 1  | 1.970364000  | 4.017665000  | -1.544300000 |
| 1  | 1.303939000  | 4.553740000  | 0.001299000  |
| 1  | 3.062529000  | 4.633598000  | -0.267704000 |
| 6  | 3.317688000  | 2.297735000  | 0.922859000  |
| 1  | 4.046236000  | 3.062105000  | 1.174525000  |
| 8  | 2.620273000  | -0.069448000 | -1.358674000 |
| 6  | 3.403364000  | -1.057807000 | -1.564975000 |
| 6  | 4.458057000  | -0.819800000 | -2.616881000 |
| 1  | 3.970608000  | -0.618883000 | -3.578629000 |
| 1  | 5.039304000  | 0.072635000  | -2.357307000 |
| 1  | 5.132214000  | -1.673489000 | -2.729596000 |
| 6  | 2.158645000  | -4.049804000 | 0.465809000  |
| 1  | 1.969974000  | -4.017693000 | 1.544298000  |
| 1  | 1.303536000  | -4.553624000 | -0.001344000 |
| 1  | 3.062110000  | -4.633685000 | 0.267704000  |
| 6  | 3.317542000  | -2.297800000 | -0.922762000 |
| 1  | 4.046014000  | -3.062238000 | -1.174443000 |
| 1  | -0.000020000 | 0.000099000  | 1.057445000  |
| 1  | 0.000022000  | 0.000059000  | -1.057441000 |

**[FeH(acac)<sub>2</sub>]<sub>2</sub> S = 3/2,3/2 (overall S = 3)**

**E = -1627.6217793**

**G<sub>298K,D3,EtOH,IM</sub> = -1627.350935**



$\langle S^2 \rangle = 12.313$

|    |              |              |              |
|----|--------------|--------------|--------------|
| 26 | 1.255600000  | 0.000027000  | -0.000030000 |
| 8  | 2.547163000  | 0.047750000  | -1.516644000 |
| 8  | 1.372433000  | -1.948106000 | 0.000384000  |
| 6  | 3.125519000  | -0.921265000 | -2.100602000 |
| 6  | 2.953367000  | -2.272910000 | -1.755607000 |
| 1  | 3.506409000  | -3.024638000 | -2.309729000 |
| 6  | 2.103012000  | -2.699938000 | -0.727493000 |
| 8  | 1.372473000  | 1.948154000  | -0.000417000 |
| 8  | 2.547208000  | -0.047742000 | 1.516584000  |
| 6  | 2.103034000  | 2.699969000  | 0.727500000  |
| 6  | 2.953378000  | 2.272918000  | 1.755611000  |
| 1  | 3.506421000  | 3.024634000  | 2.309747000  |
| 6  | 3.125540000  | 0.921264000  | 2.100573000  |
| 6  | 1.996251000  | -4.173803000 | -0.418697000 |
| 1  | 2.740341000  | -4.766539000 | -0.958397000 |
| 1  | 2.116051000  | -4.328355000 | 0.659436000  |
| 1  | 0.994436000  | -4.525802000 | -0.692836000 |
| 6  | 4.051998000  | -0.547031000 | -3.232539000 |
| 1  | 4.526426000  | -1.417740000 | -3.694253000 |
| 1  | 3.485845000  | 0.002600000  | -3.994087000 |
| 1  | 4.827487000  | 0.131266000  | -2.857186000 |
| 6  | 4.052013000  | 0.547016000  | 3.232513000  |
| 1  | 4.526635000  | 1.417701000  | 3.694074000  |
| 1  | 3.485789000  | -0.002379000 | 3.994181000  |
| 1  | 4.827340000  | -0.131498000 | 2.857223000  |
| 6  | 1.996314000  | 4.173838000  | 0.418707000  |
| 1  | 2.740384000  | 4.766558000  | 0.958452000  |
| 1  | 2.116181000  | 4.328397000  | -0.659418000 |
| 1  | 0.994490000  | 4.525850000  | 0.692790000  |
| 26 | -1.255647000 | 0.000014000  | 0.000018000  |
| 8  | -1.372466000 | -1.948117000 | -0.000506000 |
| 8  | -2.547199000 | 0.047631000  | 1.516647000  |
| 8  | -1.372543000 | 1.948139000  | 0.000520000  |
| 6  | -2.102962000 | -2.700010000 | 0.727391000  |
| 6  | -3.125477000 | -0.921428000 | 2.100608000  |
| 6  | -2.103063000 | 2.699996000  | -0.727394000 |
| 6  | -4.051919000 | -0.547268000 | 3.232600000  |
| 1  | -3.485748000 | 0.002338000  | 3.994153000  |
| 1  | -4.827438000 | 0.131029000  | 2.857312000  |
| 1  | -4.526309000 | -1.418010000 | 3.694293000  |
| 6  | -1.996154000 | -4.173858000 | 0.418534000  |
| 1  | -2.116023000 | -4.328377000 | -0.659596000 |
| 1  | -0.994303000 | -4.525819000 | 0.692587000  |
| 1  | -2.740178000 | -4.766649000 | 0.958264000  |
| 6  | -2.953271000 | -2.273055000 | 1.755573000  |
| 1  | -3.506246000 | -3.024826000 | 2.309704000  |
| 8  | -2.547245000 | -0.047674000 | -1.516606000 |
| 6  | -3.125547000 | 0.921363000  | -2.100574000 |
| 6  | -4.052003000 | 0.547171000  | -3.232546000 |
| 1  | -3.485793000 | -0.002281000 | -3.994183000 |
| 1  | -4.827398000 | -0.131277000 | -2.857276000 |

|   |              |             |              |
|---|--------------|-------------|--------------|
| 1 | -4.526542000 | 1.417885000 | -3.694137000 |
| 6 | -1.996338000 | 4.173849000 | -0.418529000 |
| 1 | -2.116247000 | 4.328361000 | 0.659598000  |
| 1 | -0.994497000 | 4.525860000 | -0.692553000 |
| 1 | -2.740377000 | 4.766604000 | -0.958278000 |
| 6 | -2.953370000 | 2.273001000 | -1.755559000 |
| 1 | -3.506381000 | 3.024749000 | -2.309685000 |
| 1 | 0.000036000  | 0.000018000 | 1.087981000  |
| 1 | -0.000079000 | 0.000082000 | -1.087994000 |

**[FeH(acac)<sub>2</sub>]<sub>2</sub> S = 5/2,5/2 (overall S = 5)**

**E = -1627.62473863**

**G<sub>298K,D3,EtOH,IM</sub> = -1627.374175**

**$\langle S^2 \rangle = 30.021$**

|    |              |              |              |
|----|--------------|--------------|--------------|
| 26 | -1.456190000 | -0.001914000 | -0.000033000 |
| 8  | -2.610385000 | -1.611114000 | 0.202415000  |
| 8  | -1.603416000 | -0.279203000 | -1.977732000 |
| 6  | -2.762460000 | -2.569834000 | -0.628410000 |
| 6  | -2.358338000 | -2.529019000 | -1.970121000 |
| 1  | -2.532168000 | -3.404536000 | -2.587740000 |
| 6  | -1.817391000 | -1.382409000 | -2.578621000 |
| 8  | -1.605085000 | 0.274702000  | 1.977598000  |
| 8  | -2.615287000 | 1.603671000  | -0.202833000 |
| 6  | -1.823549000 | 1.376879000  | 2.578728000  |
| 6  | -2.368328000 | 2.521692000  | 1.970255000  |
| 1  | -2.545840000 | 3.396345000  | 2.588052000  |
| 6  | -2.771499000 | 2.561531000  | 0.628227000  |
| 6  | -1.473254000 | -1.408499000 | -4.045651000 |
| 1  | -1.771110000 | -2.341146000 | -4.532962000 |
| 1  | -1.955671000 | -0.562461000 | -4.548801000 |
| 1  | -0.389298000 | -1.277417000 | -4.149228000 |
| 6  | -3.440721000 | -3.799634000 | -0.080185000 |
| 1  | -3.575906000 | -4.578829000 | -0.835636000 |
| 1  | -2.843718000 | -4.197595000 | 0.749328000  |
| 1  | -4.417294000 | -3.520455000 | 0.332915000  |
| 6  | -3.453621000 | 3.789114000  | 0.079834000  |
| 1  | -3.592886000 | 4.567289000  | 0.835597000  |
| 1  | -2.856900000 | 4.189919000  | -0.748519000 |
| 1  | -4.428494000 | 3.506488000  | -0.334921000 |
| 6  | -1.480554000 | 1.403632000  | 4.046019000  |
| 1  | -1.781945000 | 2.335068000  | 4.533472000  |
| 1  | -1.960430000 | 0.555751000  | 4.548497000  |
| 1  | -0.396235000 | 1.276210000  | 4.150360000  |
| 26 | 1.456025000  | 0.001908000  | -0.000020000 |
| 8  | 1.603299000  | 0.279445000  | -1.977701000 |
| 8  | 2.610181000  | 1.611066000  | 0.202701000  |
| 8  | 1.604744000  | -0.274976000 | 1.977646000  |
| 6  | 1.817540000  | 1.382661000  | -2.578469000 |
| 6  | 2.762557000  | 2.569803000  | -0.628053000 |
| 6  | 1.823472000  | -1.377148000 | 2.578672000  |
| 6  | 3.440869000  | 3.799484000  | -0.079630000 |
| 1  | 2.843608000  | 4.197639000  | 0.749608000  |

|   |             |              |              |   |              |              |              |
|---|-------------|--------------|--------------|---|--------------|--------------|--------------|
| 1 | 4.417202000 | 3.520109000  | 0.333899000  | 1 | 2.857722000  | -4.189325000 | -0.749334000 |
| 1 | 3.576533000 | 4.578604000  | -0.835071000 | 1 | 4.429088000  | -3.506137000 | -0.334474000 |
| 6 | 1.473518000 | 1.408959000  | -4.045525000 | 1 | 3.592736000  | -4.567369000 | 0.835091000  |
| 1 | 1.955461000 | 0.562640000  | -4.548648000 | 6 | 1.480516000  | -1.404117000 | 4.045973000  |
| 1 | 0.389485000 | 1.278523000  | -4.149165000 | 1 | 1.959864000  | -0.555937000 | 4.548443000  |
| 1 | 1.771932000 | 2.341439000  | -4.532812000 | 1 | 0.396113000  | -1.277381000 | 4.150337000  |
| 6 | 2.358625000 | 2.529131000  | -1.969822000 | 1 | 1.782476000  | -2.335373000 | 4.533417000  |
| 1 | 2.532683000 | 3.404658000  | -2.587362000 | 6 | 2.368424000  | -2.521827000 | 1.970087000  |
| 8 | 2.615149000 | -1.603600000 | -0.202935000 | 1 | 2.546117000  | -3.396491000 | 2.587815000  |
| 6 | 2.771545000 | -2.561502000 | 0.628046000  | 1 | -0.001749000 | 1.174579000  | 0.000353000  |
| 6 | 3.453938000 | -3.788892000 | 0.079555000  | 1 | 0.001592000  | -1.174600000 | 0.000164000  |

## 2.C EtOH adducts of FeH(acac)<sub>2</sub>

### C1. Energy diagram and views of the optimized geometries

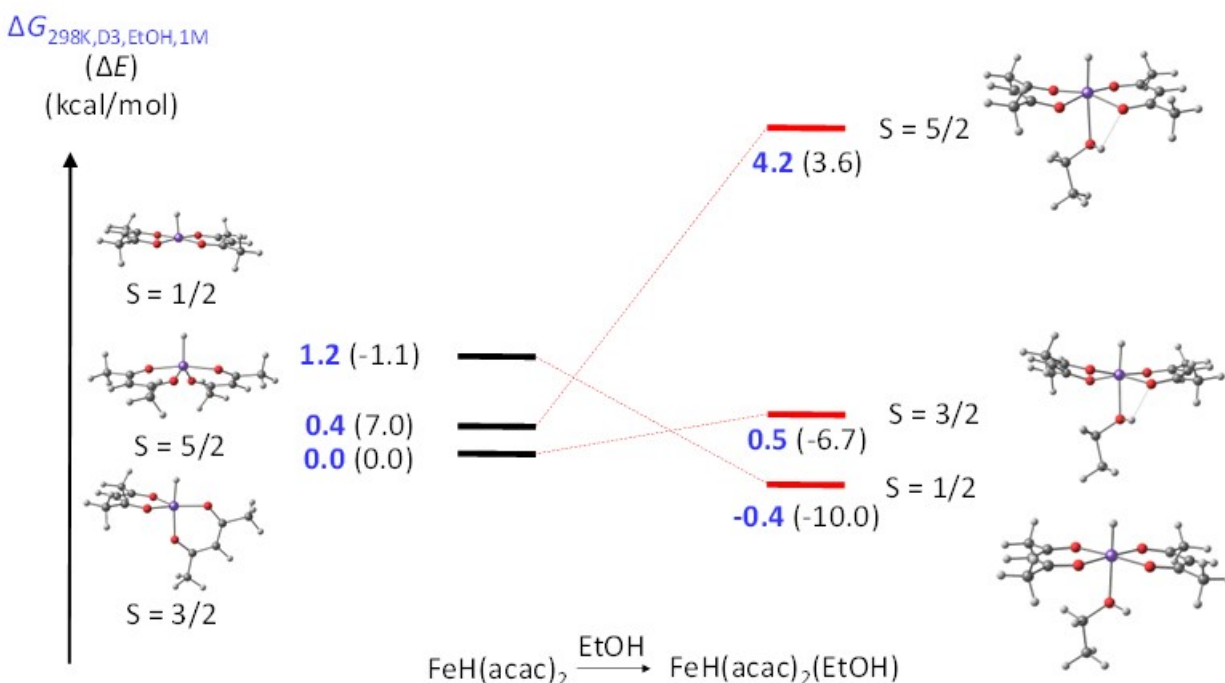

### C2. Cartesian coordinates and energies (gas-phase E and D3-corrected G in EtOH at 298 K, in hartrees) of the optimized geometries.

|                                                  |              |              |              |
|--------------------------------------------------|--------------|--------------|--------------|
| <b>FeH(acac)<sub>2</sub>(EtOH) S = 1/2</b>       |              |              |              |
| <b>E = -968.72715008</b>                         |              |              |              |
| <b>G<sub>298K,D3,EtOH,1M</sub> = -968.536197</b> |              |              |              |
| <b>&lt;S<sup>2</sup>&gt; = 0.790</b>             |              |              |              |
| 1                                                | -0.277705000 | 0.288683000  | -2.011239000 |
| 26                                               | -0.162670000 | 0.107126000  | -0.587370000 |
| 8                                                | 0.009410000  | -0.165606000 | 1.548422000  |
| 8                                                | -1.661319000 | 1.467903000  | -0.250561000 |
| 6                                                | -2.906298000 | 1.274223000  | -0.085051000 |
| 6                                                | -3.550398000 | 0.022757000  | -0.162978000 |
| 6                                                | -2.884469000 | -1.196429000 | -0.402107000 |
| 8                                                | -1.636674000 | -1.320351000 | -0.608420000 |
| 6                                                | -3.733157000 | 2.507623000  | 0.214046000  |
| 6                                                | -3.689044000 | -2.479589000 | -0.425910000 |
| 8                                                | 1.342961000  | -1.263636000 | -0.841813000 |
| 6                                                | 2.602095000  | -1.092212000 | -0.830817000 |

|   |              |              |              |
|---|--------------|--------------|--------------|
| 6 | 3.250605000  | 0.151873000  | -0.694000000 |
| 6 | 2.579627000  | 1.378451000  | -0.514094000 |
| 6 | 3.395700000  | 2.643153000  | -0.343885000 |
| 8 | 1.317621000  | 1.524546000  | -0.484093000 |
| 6 | 3.441025000  | -2.344194000 | -0.982955000 |
| 1 | -3.581110000 | 3.249210000  | -0.579512000 |
| 1 | -3.379408000 | 2.964383000  | 1.146823000  |
| 1 | -4.802031000 | 2.292235000  | 0.307338000  |
| 1 | -4.624977000 | -0.006957000 | -0.005394000 |
| 1 | -4.761333000 | -2.313353000 | -0.283960000 |
| 1 | -3.525610000 | -2.994241000 | -1.380489000 |
| 1 | -3.325534000 | -3.150648000 | 0.362373000  |
| 1 | 3.173830000  | 3.089610000  | 0.633506000  |
| 1 | 4.473476000  | 2.468502000  | -0.417936000 |
| 1 | 3.094590000  | 3.375641000  | -1.102564000 |
| 1 | 4.336971000  | 0.163144000  | -0.704878000 |
| 1 | 3.151768000  | -2.866788000 | -1.902755000 |
| 1 | 4.515357000  | -2.137331000 | -1.007526000 |
| 1 | 3.228940000  | -3.026714000 | -0.150475000 |
| 1 | -0.658100000 | -0.842019000 | 1.684419000  |
| 6 | 1.246443000  | -0.525139000 | 2.169217000  |
| 1 | 1.605615000  | -1.471678000 | 1.747826000  |
| 1 | 2.007042000  | 0.228525000  | 1.932592000  |
| 6 | 1.131537000  | -0.664104000 | 3.697605000  |
| 1 | 0.400791000  | -1.433395000 | 3.967241000  |
| 1 | 0.804425000  | 0.276158000  | 4.153024000  |
| 1 | 2.094441000  | -0.939580000 | 4.140493000  |

**FeH(acac)<sub>2</sub>(EtOH) S = 3/2**

**E = -968.721910476**

**G<sub>298K,D3,EtOH,1M</sub> = -968.534730**

**<S<sup>2</sup>> = 3.905**

|    |              |              |              |
|----|--------------|--------------|--------------|
| 1  | -0.215478000 | 0.941113000  | -1.670412000 |
| 26 | -0.090128000 | 0.251572000  | -0.311146000 |
| 8  | -0.104719000 | -0.978486000 | 1.483367000  |
| 8  | -1.390912000 | 1.527852000  | 0.272900000  |
| 6  | -2.662303000 | 1.495888000  | 0.095770000  |
| 6  | -3.413560000 | 0.416548000  | -0.380835000 |
| 6  | -2.899711000 | -0.867910000 | -0.669491000 |
| 8  | -1.680536000 | -1.203106000 | -0.567844000 |
| 6  | -3.362296000 | 2.778226000  | 0.473188000  |
| 6  | -3.855497000 | -1.949497000 | -1.122295000 |
| 8  | 1.190140000  | -0.863586000 | -1.206825000 |
| 6  | 2.435566000  | -0.603482000 | -1.413388000 |
| 6  | 3.168656000  | 0.439013000  | -0.849467000 |
| 6  | 2.664949000  | 1.356842000  | 0.109128000  |
| 6  | 3.592934000  | 2.423245000  | 0.649082000  |
| 8  | 1.488301000  | 1.352994000  | 0.568252000  |
| 6  | 3.107475000  | -1.562682000 | -2.364868000 |
| 1  | -2.962400000 | 3.600085000  | -0.132973000 |
| 1  | -3.138309000 | 3.016292000  | 1.519916000  |
| 1  | -4.446170000 | 2.721988000  | 0.339304000  |

|   |              |              |              |
|---|--------------|--------------|--------------|
| 1 | -4.483362000 | 0.566576000  | -0.492333000 |
| 1 | -4.898948000 | -1.621867000 | -1.136603000 |
| 1 | -3.568607000 | -2.279091000 | -2.128496000 |
| 1 | -3.758585000 | -2.820576000 | -0.463041000 |
| 1 | 3.596400000  | 2.380728000  | 1.744544000  |
| 1 | 4.617372000  | 2.329923000  | 0.276995000  |
| 1 | 3.199069000  | 3.408651000  | 0.371179000  |
| 1 | 4.208858000  | 0.537133000  | -1.145914000 |
| 1 | 2.618392000  | -1.500980000 | -3.344847000 |
| 1 | 4.175779000  | -1.359945000 | -2.481412000 |
| 1 | 2.970349000  | -2.589681000 | -2.005749000 |
| 1 | -0.699222000 | -1.663021000 | 1.127415000  |
| 6 | 1.079478000  | -1.570726000 | 2.033355000  |
| 1 | 1.580910000  | -2.178802000 | 1.267219000  |
| 1 | 1.730717000  | -0.724311000 | 2.270495000  |
| 6 | 0.765792000  | -2.387753000 | 3.273324000  |
| 1 | 0.113082000  | -3.238375000 | 3.038019000  |
| 1 | 0.266978000  | -1.769772000 | 4.028005000  |
| 1 | 1.689430000  | -2.788553000 | 3.708669000  |

**FeH(acac)<sub>2</sub>(EtOH) S = 5/2**

**E = -968.705443892**

**G<sub>298K,D3,EtOH,1M</sub> = -968.528839**

**<S<sup>2</sup>> = 8.757**

|    |              |              |              |
|----|--------------|--------------|--------------|
| 1  | -0.165254000 | 1.130522000  | -1.972516000 |
| 26 | -0.104134000 | 0.381368000  | -0.445043000 |
| 8  | -0.143324000 | -1.028642000 | 1.569519000  |
| 8  | -1.561906000 | 1.453465000  | 0.375994000  |
| 6  | -2.819063000 | 1.329204000  | 0.209585000  |
| 6  | -3.440993000 | 0.222246000  | -0.396409000 |
| 6  | -2.751551000 | -0.913900000 | -0.843655000 |
| 8  | -1.482288000 | -1.071511000 | -0.786012000 |
| 6  | -3.658921000 | 2.469199000  | 0.726989000  |
| 6  | -3.519745000 | -2.069968000 | -1.433675000 |
| 8  | 1.338637000  | -0.922782000 | -1.010244000 |
| 6  | 2.560774000  | -0.628386000 | -1.227407000 |
| 6  | 3.198531000  | 0.534604000  | -0.759153000 |
| 6  | 2.564352000  | 1.501178000  | 0.036980000  |
| 6  | 3.344702000  | 2.686041000  | 0.546227000  |
| 8  | 1.336767000  | 1.459343000  | 0.392643000  |
| 6  | 3.340346000  | -1.631454000 | -2.040775000 |
| 1  | -3.357891000 | 3.394349000  | 0.220833000  |
| 1  | -3.455438000 | 2.608868000  | 1.795410000  |
| 1  | -4.730240000 | 2.307220000  | 0.579320000  |
| 1  | -4.522843000 | 0.230468000  | -0.484989000 |
| 1  | -4.601576000 | -1.911511000 | -1.418118000 |
| 1  | -3.192100000 | -2.223780000 | -2.469125000 |
| 1  | -3.279425000 | -2.988036000 | -0.883894000 |
| 1  | 3.257207000  | 2.736396000  | 1.638047000  |
| 1  | 4.401063000  | 2.648972000  | 0.265927000  |
| 1  | 2.897279000  | 3.605115000  | 0.148337000  |
| 1  | 4.249164000  | 0.673578000  | -0.994144000 |

|   |              |              |              |   |             |              |             |
|---|--------------|--------------|--------------|---|-------------|--------------|-------------|
| 1 | 2.918192000  | -1.670783000 | -3.052802000 | 1 | 1.440077000 | -0.552304000 | 2.716574000 |
| 1 | 4.404523000  | -1.388218000 | -2.107119000 | 6 | 0.780234000 | -2.544308000 | 3.250233000 |
| 1 | 3.218145000  | -2.629930000 | -1.605374000 | 1 | 0.401819000 | -3.455413000 | 2.767912000 |
| 1 | -0.501411000 | -1.764508000 | 1.047862000  | 1 | 0.038403000 | -2.213244000 | 3.985572000 |
| 6 | 1.048991000  | -1.451676000 | 2.228563000  | 1 | 1.702129000 | -2.810321000 | 3.782465000 |
| 1 | 1.796639000  | -1.778668000 | 1.490713000  |   |             |              |             |

## 2.D Silane activation of Fe(OMe)(acac)<sub>2</sub>

### D1. Energy diagram and views of the optimized geometries

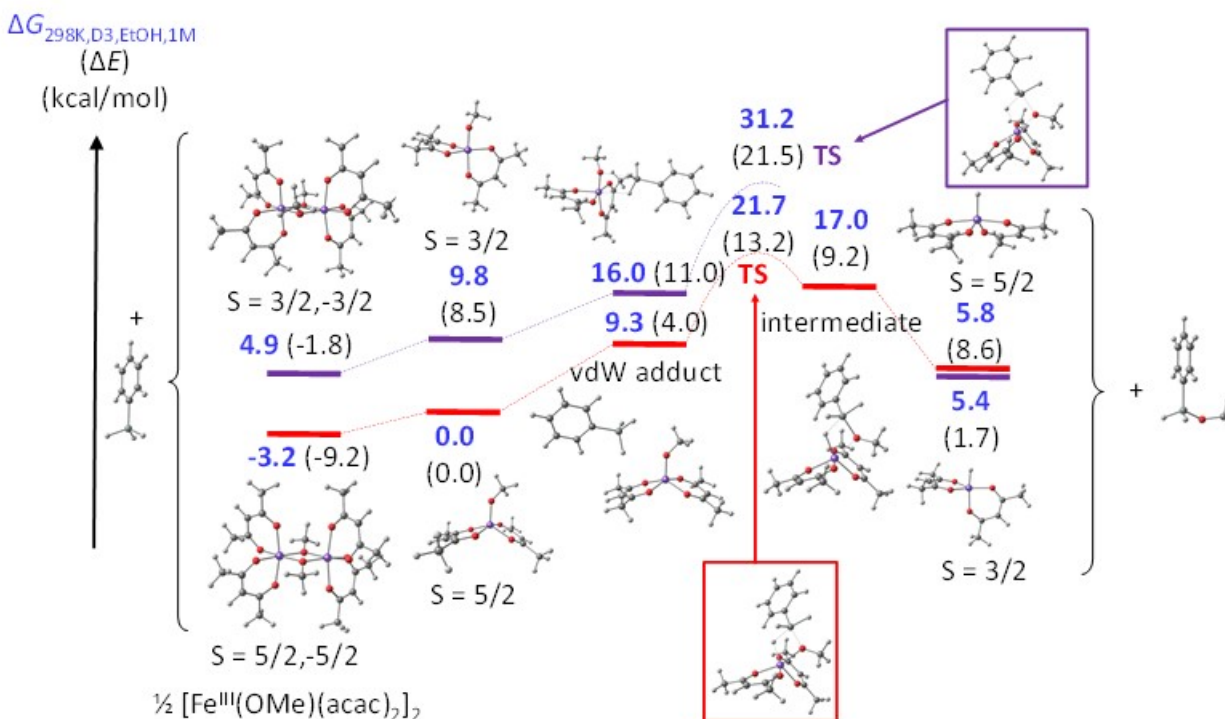

#### PhSiH<sub>3</sub>

E = -522.5619520

G<sub>298K,D3,EtOH,1M</sub> = -522.492697

(restricted closed-shell system, S = 0)

|    |              |              |              |
|----|--------------|--------------|--------------|
| 6  | -2.350031000 | 0.001733000  | 0.008509000  |
| 6  | -1.651621000 | -1.206585000 | 0.002718000  |
| 6  | -1.649446000 | 1.207408000  | 0.002500000  |
| 1  | -2.194243000 | -2.150328000 | 0.003091000  |
| 1  | -2.189417000 | 2.152660000  | 0.002508000  |
| 6  | -0.257639000 | -1.206142000 | -0.007782000 |
| 6  | -0.254203000 | 1.203574000  | -0.007878000 |
| 1  | 0.270876000  | -2.159445000 | -0.018528000 |
| 1  | 0.278899000  | 2.153856000  | -0.018419000 |
| 6  | 0.467106000  | -0.001745000 | -0.009872000 |
| 1  | -3.438556000 | 0.002647000  | 0.014350000  |
| 14 | 2.345267000  | -0.000023000 | 0.004735000  |

1 2.879410000 -1.029412000 -0.934481000

1 2.843776000 1.344600000 -0.405749000

1 2.890514000 -0.303707000 1.361760000

[Fe(OMe)(acac)<sub>2</sub>]...PhSiH<sub>3</sub> (vdW adduct, S = 5/2)

E = -1450.84048913

G<sub>298K,D3,EtOH,1M</sub> = -1450.614230

<S<sup>2</sup>> = 8.762

|    |              |              |              |
|----|--------------|--------------|--------------|
| 26 | -1.786716000 | -0.035241000 | -0.013338000 |
| 8  | -3.100523000 | -0.393718000 | 1.442034000  |
| 8  | -3.360147000 | -0.164532000 | -1.258864000 |
| 6  | -4.349589000 | -0.656550000 | 1.406599000  |
| 6  | -5.122587000 | -0.691040000 | 0.236815000  |
| 1  | -6.181033000 | -0.916231000 | 0.319513000  |
| 6  | -4.584756000 | -0.440942000 | -1.035984000 |
| 8  | -0.662923000 | 0.796148000  | 1.416386000  |

|    |              |              |              |    |              |              |              |
|----|--------------|--------------|--------------|----|--------------|--------------|--------------|
| 8  | -1.187810000 | 1.463713000  | -1.182080000 | 6  | 0.738439000  | 2.884712000  | -0.510517000 |
| 6  | 0.145246000  | 1.780034000  | 1.369261000  | 8  | 1.219250000  | -1.586302000 | 0.834061000  |
| 6  | 0.353225000  | 2.583090000  | 0.235580000  | 8  | 3.197353000  | -0.033416000 | -0.425382000 |
| 1  | 1.061905000  | 3.402429000  | 0.302824000  | 6  | 2.136048000  | -2.475927000 | 0.796890000  |
| 6  | -0.325675000 | 2.382375000  | -0.975054000 | 6  | 3.415098000  | -2.302338000 | 0.249164000  |
| 6  | -5.474404000 | -0.485333000 | -2.252907000 | 1  | 4.102820000  | -3.140577000 | 0.300953000  |
| 1  | -6.510870000 | -0.734247000 | -2.008613000 | 6  | 3.886793000  | -1.096765000 | -0.302737000 |
| 1  | -5.443976000 | 0.488507000  | -2.756172000 | 6  | 0.364794000  | 3.966484000  | -1.489084000 |
| 1  | -5.081310000 | -1.222769000 | -2.962853000 | 1  | 0.391288000  | 4.962724000  | -1.039782000 |
| 6  | -4.988685000 | -0.934810000 | 2.743371000  | 1  | 1.050669000  | 3.935354000  | -2.344100000 |
| 1  | -6.058202000 | -1.148304000 | 2.663064000  | 1  | -0.641921000 | 3.770310000  | -1.877158000 |
| 1  | -4.482747000 | -1.785981000 | 3.214647000  | 6  | 1.589458000  | 2.635279000  | 3.210059000  |
| 1  | -4.838855000 | -0.071050000 | 3.402104000  | 1  | 1.570400000  | 3.719690000  | 3.347966000  |
| 6  | -0.058099000 | 3.291059000  | -2.148483000 | 1  | 0.839594000  | 2.173579000  | 3.863369000  |
| 1  | 0.679099000  | 4.066142000  | -1.921136000 | 1  | 2.566892000  | 2.245862000  | 3.518241000  |
| 1  | 0.295875000  | 2.690466000  | -2.995007000 | 6  | 5.317641000  | -1.005742000 | -0.777228000 |
| 1  | -0.996685000 | 3.763246000  | -2.462367000 | 1  | 5.861991000  | -1.947128000 | -0.660882000 |
| 6  | 0.899564000  | 2.063117000  | 2.643597000  | 1  | 5.331432000  | -0.707975000 | -1.832407000 |
| 1  | 1.584826000  | 2.910137000  | 2.549047000  | 1  | 5.835226000  | -0.218750000 | -0.215446000 |
| 1  | 0.183480000  | 2.264592000  | 3.449425000  | 6  | 1.763467000  | -3.791182000 | 1.433230000  |
| 1  | 1.464547000  | 1.169328000  | 2.933202000  | 1  | 2.592887000  | -4.503723000 | 1.437706000  |
| 8  | -0.876256000 | -1.536646000 | -0.454084000 | 1  | 1.429268000  | -3.616026000 | 2.462501000  |
| 6  | -1.295159000 | -2.781916000 | -0.920028000 | 1  | 0.916626000  | -4.225535000 | 0.888221000  |
| 1  | -1.519050000 | -3.463421000 | -0.082218000 | 8  | 0.696469000  | -0.849571000 | -1.595545000 |
| 1  | -2.198590000 | -2.702040000 | -1.546602000 | 6  | 1.077754000  | -0.411850000 | -2.870042000 |
| 1  | -0.499075000 | -3.243188000 | -1.524779000 | 1  | 0.597009000  | -1.068369000 | -3.611354000 |
| 14 | 3.061516000  | -1.380494000 | -0.450357000 | 1  | 0.761786000  | 0.624324000  | -3.063259000 |
| 1  | 2.133003000  | -0.374156000 | 0.128578000  | 1  | 2.169269000  | -0.473841000 | -3.010256000 |
| 1  | 2.840832000  | -2.708847000 | 0.191635000  | 14 | -2.264457000 | -0.767756000 | -0.778872000 |
| 1  | 2.761936000  | -1.514410000 | -1.907564000 | 1  | -1.887113000 | -2.204699000 | -0.859852000 |
| 6  | 4.848972000  | -0.857059000 | -0.177754000 | 1  | -1.388199000 | -0.085201000 | 0.221828000  |
| 6  | 5.851474000  | -1.813644000 | 0.058703000  | 1  | -2.152939000 | -0.115205000 | -2.112076000 |
| 6  | 5.228696000  | 0.494882000  | -0.231391000 | 6  | -4.055839000 | -0.590509000 | -0.213580000 |
| 6  | 7.184342000  | -1.436377000 | 0.225486000  | 6  | -4.448056000 | -0.923909000 | 1.095294000  |
| 6  | 6.560045000  | 0.877561000  | -0.065285000 | 6  | -5.046056000 | -0.126864000 | -1.095895000 |
| 6  | 7.540865000  | -0.088738000 | 0.162183000  | 6  | -5.775301000 | -0.802744000 | 1.505334000  |
| 1  | 5.587558000  | -2.869521000 | 0.118362000  | 6  | -6.376903000 | -0.004556000 | -0.692011000 |
| 1  | 4.473936000  | 1.263187000  | -0.401059000 | 6  | -6.743550000 | -0.342675000 | 0.610454000  |
| 1  | 7.944831000  | -2.193845000 | 0.408665000  | 1  | -3.705591000 | -1.282166000 | 1.809320000  |
| 1  | 6.832320000  | 1.930976000  | -0.110084000 | 1  | -4.774197000 | 0.145747000  | -2.115785000 |
| 1  | 8.580065000  | 0.208191000  | 0.293767000  | 1  | -6.055890000 | -1.066082000 | 2.524110000  |
|    |              |              |              | 1  | -7.127003000 | 0.356971000  | -1.393882000 |
|    |              |              |              | 1  | -7.780286000 | -0.246770000 | 0.929172000  |

**[Fe(OMe)(acac)<sub>2</sub>] $\cdots$ PhSiH<sub>3</sub> (vdW adduct, S = 3/2)**

**E = -1450.82930312**

**G<sub>298K,D3,EtOH,IM</sub> = -1450.603485**

**<S<sup>2</sup>> = 3.813**

|    |             |             |              |
|----|-------------|-------------|--------------|
| 26 | 1.207788000 | 0.059068000 | -0.138867000 |
| 8  | 1.347159000 | 0.976961000 | 1.560154000  |
| 8  | 0.720887000 | 1.697303000 | -1.000941000 |
| 6  | 1.323231000 | 2.229743000 | 1.783556000  |
| 6  | 1.051547000 | 3.207208000 | 0.810493000  |
| 1  | 1.035564000 | 4.250310000 | 1.108564000  |

**[Fe(acac)<sub>2</sub> $\cdots$ (H)(OMe)·SiPhH<sub>2</sub>] (TS, S = 5/2)**

**E = -1450.82578558**

**G<sub>298K,D3,EtOH,IM</sub> = -1450.594510**

**<S<sup>2</sup>> = 8.760**

|    |             |              |              |
|----|-------------|--------------|--------------|
| 26 | 0.971572000 | 0.028137000  | -0.138162000 |
| 8  | 2.832553000 | -0.501629000 | -0.474537000 |
| 8  | 0.788270000 | -1.682522000 | 0.909063000  |
| 6  | 3.492045000 | -1.540344000 | -0.106852000 |

|    |              |              |              |    |              |              |              |
|----|--------------|--------------|--------------|----|--------------|--------------|--------------|
| 6  | 2.967972000  | -2.580850000 | 0.663315000  | 8  | 1.434548000  | 1.616055000  | -0.941373000 |
| 1  | 3.616290000  | -3.414117000 | 0.914401000  | 6  | 2.176764000  | 1.692550000  | 1.856805000  |
| 6  | 1.637215000  | -2.601123000 | 1.129873000  | 6  | 2.523505000  | 2.660361000  | 0.900146000  |
| 8  | 1.291359000  | 1.823543000  | -0.986678000 | 1  | 3.100488000  | 3.523074000  | 1.215261000  |
| 8  | 0.899479000  | 1.004619000  | 1.578215000  | 6  | 2.115874000  | 2.579216000  | -0.431176000 |
| 6  | 1.185186000  | 2.995488000  | -0.498183000 | 8  | 0.118594000  | -1.475392000 | 0.748190000  |
| 6  | 0.948797000  | 3.265048000  | 0.861508000  | 8  | 2.508715000  | -1.019005000 | -0.569509000 |
| 1  | 0.882048000  | 4.300065000  | 1.180708000  | 6  | 0.570125000  | -2.675178000 | 0.799732000  |
| 6  | 0.835821000  | 2.258568000  | 1.828192000  | 6  | 1.796406000  | -3.107096000 | 0.288160000  |
| 6  | 1.144660000  | -3.765409000 | 1.949726000  | 1  | 2.060508000  | -4.151898000 | 0.415448000  |
| 1  | 1.914998000  | -4.524212000 | 2.112012000  | 6  | 2.713125000  | -2.254668000 | -0.357912000 |
| 1  | 0.786408000  | -3.396012000 | 2.917936000  | 6  | 2.451422000  | 3.675581000  | -1.404476000 |
| 1  | 0.284619000  | -4.221255000 | 1.444905000  | 1  | 3.034397000  | 4.476181000  | -0.942239000 |
| 6  | 4.925158000  | -1.582223000 | -0.568289000 | 1  | 3.013595000  | 3.254432000  | -2.246308000 |
| 1  | 5.445091000  | -2.485948000 | -0.239198000 | 1  | 1.521439000  | 4.089487000  | -1.812080000 |
| 1  | 4.955974000  | -1.523457000 | -1.662940000 | 6  | 2.611250000  | 1.851535000  | 3.289605000  |
| 1  | 5.453575000  | -0.700312000 | -0.186454000 | 1  | 1.724284000  | 1.895153000  | 3.932622000  |
| 6  | 0.636736000  | 2.615964000  | 3.277705000  | 1  | 3.185072000  | 0.967939000  | 3.592666000  |
| 1  | 0.601566000  | 3.696208000  | 3.442827000  | 1  | 3.215456000  | 2.749086000  | 3.444839000  |
| 1  | -0.295825000 | 2.163161000  | 3.635331000  | 6  | 4.035318000  | -2.802918000 | -0.837147000 |
| 1  | 1.450352000  | 2.183574000  | 3.872336000  | 1  | 4.144014000  | -3.873490000 | -0.642350000 |
| 6  | 1.341761000  | 4.129955000  | -1.477017000 | 1  | 4.136340000  | -2.618646000 | -1.913256000 |
| 1  | 1.290076000  | 5.110783000  | -0.996707000 | 1  | 4.850687000  | -2.261823000 | -0.341982000 |
| 1  | 2.300959000  | 4.028183000  | -1.998158000 | 6  | -0.349306000 | -3.643773000 | 1.496680000  |
| 1  | 0.553600000  | 4.058119000  | -2.236300000 | 1  | -1.307683000 | -3.677860000 | 0.965164000  |
| 8  | 0.103542000  | -0.565621000 | -1.788973000 | 1  | 0.073593000  | -4.650573000 | 1.548954000  |
| 6  | 0.621245000  | -0.553712000 | -3.102929000 | 1  | -0.557539000 | -3.281953000 | 2.510266000  |
| 1  | 1.568989000  | -1.104485000 | -3.134011000 | 8  | -0.193025000 | -0.301442000 | -1.674040000 |
| 1  | -0.101568000 | -1.035893000 | -3.776803000 | 6  | 0.369049000  | -0.358970000 | -2.973872000 |
| 1  | 0.795630000  | 0.478155000  | -3.439170000 | 1  | -0.450462000 | -0.387750000 | -3.704038000 |
| 14 | -1.737644000 | -0.169717000 | -1.417107000 | 1  | 0.994601000  | 0.523565000  | -3.161246000 |
| 1  | -1.760948000 | 1.191897000  | -2.042586000 | 1  | 0.975759000  | -1.266512000 | -3.070994000 |
| 1  | -2.048200000 | -1.197745000 | -2.485146000 | 14 | -1.813660000 | 0.625546000  | -1.302820000 |
| 1  | -0.995318000 | 0.067132000  | -0.023461000 | 1  | -2.305267000 | -0.039710000 | -2.585179000 |
| 6  | -3.401694000 | -0.348979000 | -0.467817000 | 1  | -0.998303000 | 0.774885000  | 0.075246000  |
| 6  | -4.482892000 | -1.003435000 | -1.078620000 | 1  | -1.626672000 | 2.052928000  | -1.734817000 |
| 6  | -3.605352000 | 0.191157000  | 0.811231000  | 6  | -3.445127000 | 0.394278000  | -0.328769000 |
| 6  | -5.728013000 | -1.091633000 | -0.452476000 | 6  | -3.545366000 | 0.672744000  | 1.043314000  |
| 6  | -4.844694000 | 0.108865000  | 1.446961000  | 6  | -4.604559000 | -0.034870000 | -0.994618000 |
| 6  | -5.911206000 | -0.532661000 | 0.813082000  | 6  | -4.758965000 | 0.554842000  | 1.721580000  |
| 1  | -4.345077000 | -1.455023000 | -2.062674000 | 6  | -5.823899000 | -0.156893000 | -0.325720000 |
| 1  | -2.772952000 | 0.679910000  | 1.321159000  | 6  | -5.902857000 | 0.140124000  | 1.035854000  |
| 1  | -6.553324000 | -1.602778000 | -0.947262000 | 1  | -2.651614000 | 0.982916000  | 1.587307000  |
| 1  | -4.980378000 | 0.538037000  | 2.439339000  | 1  | -4.545780000 | -0.278870000 | -2.056395000 |
| 1  | -6.878553000 | -0.604676000 | 1.308453000  | 1  | -4.814458000 | 0.779759000  | 2.786328000  |
|    |              |              |              | 1  | -6.711332000 | -0.489484000 | -0.863348000 |
|    |              |              |              | 1  | -6.850664000 | 0.040570000  | 1.563416000  |

**[Fe(acac)<sub>2</sub>·(H)(OMe) · SiPhH<sub>2</sub>] (TS, S = 3/2)**

**E = -1450.81254994**

**G<sub>298K,D3,EtOH,1M</sub> = -1450.579294**

**<S<sup>2</sup>> = 3.810**

|    |             |             |              |
|----|-------------|-------------|--------------|
| 26 | 0.837488000 | 0.046893000 | -0.093179000 |
| 8  | 1.482361000 | 0.651100000 | 1.615448000  |

**[FeH(acac)<sub>2</sub>]··PhSi(OMe)H<sub>2</sub> (intermediate, S = 5/2)**

**E = -1450.83208165**

**G<sub>298K,D3,EtOH,1M</sub> = -1450.601975**

**<S<sup>2</sup>> = 8.760**

|    |              |              |              |
|----|--------------|--------------|--------------|
| 26 | -0.873896000 | 0.093699000  | 0.029412000  |
| 8  | -1.701051000 | 1.743710000  | -0.705661000 |
| 8  | 0.338244000  | 1.320375000  | 1.072899000  |
| 6  | -1.336828000 | 2.967507000  | -0.618063000 |
| 6  | -0.243145000 | 3.417924000  | 0.131008000  |
| 1  | -0.013885000 | 4.478794000  | 0.123438000  |
| 6  | 0.531344000  | 2.572425000  | 0.947928000  |
| 8  | -2.214066000 | -1.096767000 | -0.887545000 |
| 8  | -1.749247000 | -0.432320000 | 1.717873000  |
| 6  | -3.047379000 | -1.925263000 | -0.394651000 |
| 6  | -3.283677000 | -2.085318000 | 0.981956000  |
| 1  | -4.019878000 | -2.816933000 | 1.298898000  |
| 6  | -2.631832000 | -1.326831000 | 1.962199000  |
| 6  | 1.655193000  | 3.144618000  | 1.773125000  |
| 1  | 1.810364000  | 4.212027000  | 1.593281000  |
| 1  | 1.437476000  | 2.985579000  | 2.836471000  |
| 1  | 2.577035000  | 2.595379000  | 1.548921000  |
| 6  | -2.186850000 | 3.951503000  | -1.381433000 |
| 1  | -1.819758000 | 4.978125000  | -1.297585000 |
| 1  | -2.220833000 | 3.662362000  | -2.438589000 |
| 1  | -3.216184000 | 3.905281000  | -1.005268000 |
| 6  | -2.957081000 | -1.529399000 | 3.418798000  |
| 1  | -3.731068000 | -2.285700000 | 3.575525000  |
| 1  | -2.046058000 | -1.826677000 | 3.952195000  |
| 1  | -3.285118000 | -0.577169000 | 3.852412000  |
| 6  | -3.810836000 | -2.758508000 | -1.391727000 |
| 1  | -4.528657000 | -3.432504000 | -0.916436000 |
| 1  | -4.339577000 | -2.095451000 | -2.086878000 |
| 1  | -3.101173000 | -3.346916000 | -1.985804000 |
| 8  | 0.257565000  | -0.115333000 | -1.740659000 |
| 6  | -0.162654000 | 0.204205000  | -3.063394000 |
| 1  | -0.189189000 | 1.293398000  | -3.173509000 |
| 1  | 0.541407000  | -0.220835000 | -3.788804000 |
| 1  | -1.165273000 | -0.204068000 | -3.236881000 |
| 14 | 1.332815000  | -1.447274000 | -1.329003000 |
| 1  | 0.715400000  | -2.805787000 | -1.162063000 |
| 1  | 1.896934000  | -1.566750000 | -2.737034000 |
| 1  | 0.452726000  | -1.085765000 | 0.188736000  |

|   |             |              |              |
|---|-------------|--------------|--------------|
| 6 | 2.940003000 | -1.133534000 | -0.376836000 |
| 6 | 4.155924000 | -1.253727000 | -1.072723000 |
| 6 | 2.993353000 | -0.829784000 | 0.993927000  |
| 6 | 5.380961000 | -1.094822000 | -0.422710000 |
| 6 | 4.215112000 | -0.667337000 | 1.647883000  |
| 6 | 5.412037000 | -0.802188000 | 0.941041000  |
| 1 | 4.140319000 | -1.476922000 | -2.139504000 |
| 1 | 2.062204000 | -0.704138000 | 1.544300000  |
| 1 | 6.310720000 | -1.196070000 | -0.980986000 |
| 1 | 4.234630000 | -0.434955000 | 2.712023000  |
| 1 | 6.365892000 | -0.674781000 | 1.451240000  |

**PhSi(OMe)H<sub>2</sub>**

**E = -637.022084664**

**G<sub>298K,D3,EtOH,IM</sub> = -636.929137**

(restricted closed-shell system, S = 0)

|    |              |              |              |
|----|--------------|--------------|--------------|
| 6  | -2.974628000 | 0.054748000  | -0.430485000 |
| 6  | -2.320378000 | 1.219626000  | -0.030317000 |
| 6  | -2.296841000 | -1.165852000 | -0.414351000 |
| 1  | -2.847350000 | 2.172179000  | -0.039062000 |
| 1  | -2.807382000 | -2.076588000 | -0.722681000 |
| 6  | -0.989119000 | 1.161566000  | 0.383337000  |
| 6  | -0.967571000 | -1.218424000 | 0.001167000  |
| 1  | -0.489631000 | 2.077861000  | 0.698595000  |
| 1  | -0.453114000 | -2.179364000 | 0.012934000  |
| 6  | -0.286994000 | -0.055560000 | 0.405997000  |
| 1  | -4.013692000 | 0.096194000  | -0.752704000 |
| 14 | 1.503220000  | -0.118601000 | 0.958346000  |
| 1  | 1.806990000  | 1.196550000  | 1.608076000  |
| 1  | 1.726595000  | -1.243246000 | 1.904529000  |
| 8  | 2.570533000  | -0.416284000 | -0.286436000 |
| 6  | 2.704124000  | 0.474124000  | -1.379645000 |
| 1  | 1.769850000  | 0.559052000  | -1.954301000 |
| 1  | 3.002703000  | 1.482193000  | -1.051712000 |
| 1  | 3.484126000  | 0.084497000  | -2.043244000 |

## 2.E Comparison of different silanes as activators

### E1. Energy diagram and views of the optimized geometries

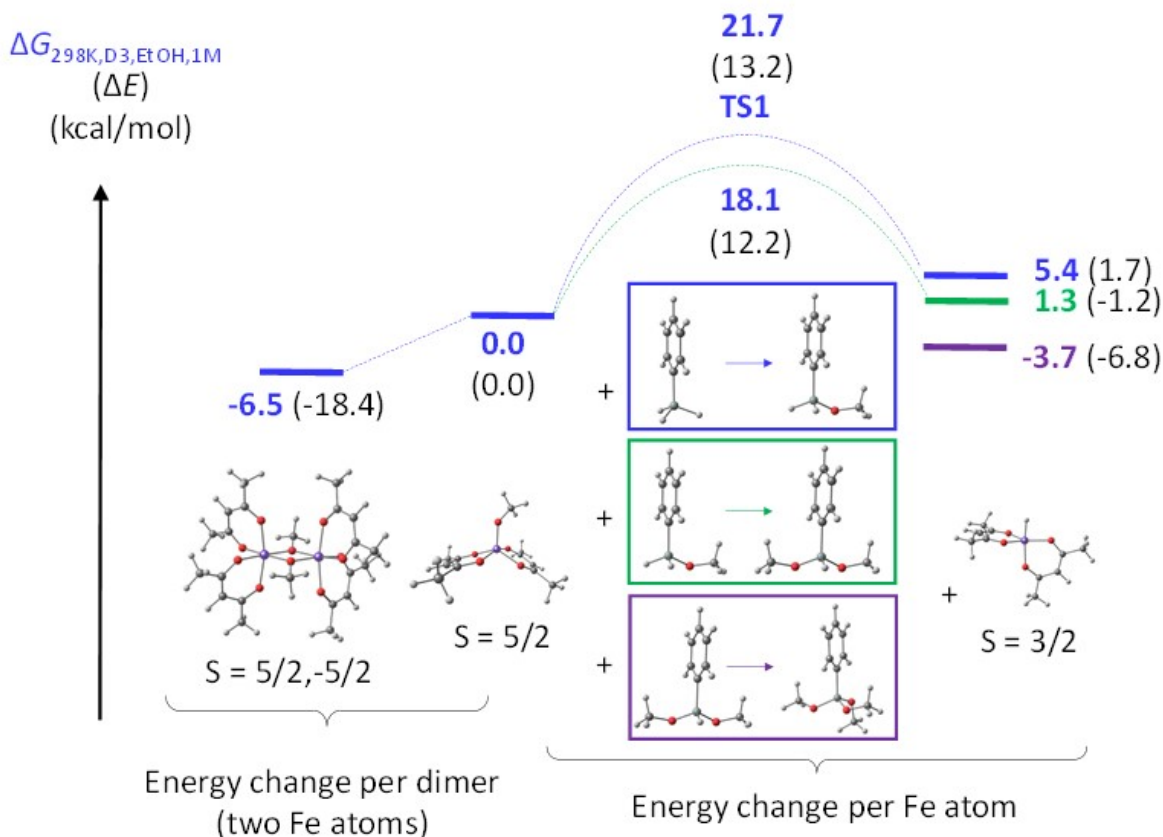

### E2. Cartesian coordinates and energies (gas-phase E and D3-corrected G in EtOH at 298 K, in hartrees) of the optimized geometries.

**PhSiH(OMe)<sub>2</sub>**

**E = -751.486638191**

**G<sub>298K,D3,EtOH,1M</sub> = -751.372166**

(restricted closed-shell system, S = 0)

|    |              |              |              |
|----|--------------|--------------|--------------|
| 6  | 3.339951000  | 0.049073000  | -0.187515000 |
| 6  | 2.792396000  | -0.300647000 | 1.046782000  |
| 6  | 2.501505000  | 0.376310000  | -1.255323000 |
| 1  | 3.444484000  | -0.552284000 | 1.881463000  |
| 1  | 2.928701000  | 0.653227000  | -2.217686000 |
| 6  | 1.406773000  | -0.323122000 | 1.209688000  |
| 6  | 1.118015000  | 0.350408000  | -1.087819000 |
| 1  | 0.989019000  | -0.590368000 | 2.181129000  |
| 1  | 0.472305000  | 0.612498000  | -1.925630000 |
| 6  | 0.544905000  | -0.002961000 | 0.147756000  |
| 1  | 4.420624000  | 0.069798000  | -0.317904000 |
| 14 | -1.310957000 | -0.047034000 | 0.381826000  |
| 1  | -1.576404000 | -0.162776000 | 1.852246000  |

|   |              |              |              |
|---|--------------|--------------|--------------|
| 8 | -2.031927000 | -1.282199000 | -0.448770000 |
| 6 | -1.641740000 | -2.634280000 | -0.300085000 |
| 1 | -0.576798000 | -2.782380000 | -0.532394000 |
| 1 | -1.830483000 | -3.005512000 | 0.718959000  |
| 1 | -2.234770000 | -3.236256000 | -0.997327000 |
| 8 | -2.033586000 | 1.294252000  | -0.260836000 |
| 6 | -1.747819000 | 2.597921000  | 0.210212000  |
| 1 | -1.988751000 | 2.711205000  | 1.278376000  |
| 1 | -0.690299000 | 2.863240000  | 0.063306000  |
| 1 | -2.364044000 | 3.305443000  | -0.355428000 |

**PhSi(OMe)<sub>3</sub>**

**E = -865.960189226**

**G<sub>298K,D3,EtOH,1M</sub> = -865.823076**

(restricted closed-shell system, S = 0)

|   |             |              |             |
|---|-------------|--------------|-------------|
| 6 | 3.705223000 | -0.121988000 | 0.314154000 |
| 6 | 2.885172000 | -0.671872000 | 1.300191000 |



|    |              |              |              |
|----|--------------|--------------|--------------|
| 6  | 3.135659000  | 0.486675000  | -0.805176000 |
| 1  | 3.327569000  | -1.142993000 | 2.176389000  |
| 1  | 3.773024000  | 0.919994000  | -1.574097000 |
| 6  | 1.498059000  | -0.615046000 | 1.165835000  |
| 6  | 1.748542000  | 0.541685000  | -0.936852000 |
| 1  | 0.861339000  | -1.035902000 | 1.941967000  |
| 1  | 1.314279000  | 1.024276000  | -1.812196000 |
| 6  | 0.904995000  | -0.010037000 | 0.044541000  |
| 1  | 4.788078000  | -0.165176000 | 0.418920000  |
| 14 | -0.942718000 | 0.064134000  | -0.175226000 |
| 8  | -1.514867000 | -0.934940000 | -1.360187000 |
| 6  | -1.153721000 | -2.301385000 | -1.457732000 |
| 1  | -0.067473000 | -2.447847000 | -1.369463000 |
| 1  | -1.648818000 | -2.907339000 | -0.684960000 |
| 1  | -1.473206000 | -2.667573000 | -2.439785000 |
| 8  | -1.440231000 | 1.540770000  | -0.722223000 |
| 6  | -1.142342000 | 2.745120000  | -0.038131000 |
| 1  | -1.712657000 | 2.832095000  | 0.897797000  |
| 1  | -0.071973000 | 2.827712000  | 0.200431000  |
| 1  | -1.418014000 | 3.582207000  | -0.689235000 |
| 8  | -1.567619000 | -0.325513000 | 1.309170000  |
| 6  | -2.962255000 | -0.462188000 | 1.536951000  |
| 1  | -3.459937000 | 0.517186000  | 1.556722000  |
| 1  | -3.442731000 | -1.077566000 | 0.763925000  |
| 1  | -3.105685000 | -0.945272000 | 2.509968000  |

**[Fe(acac)<sub>2</sub>·(H)(OMe)·SiPh(OMe)H] (TS, S = 5/2)**

**E = -1565.28746082**

**G<sub>298K,D3,EtOH,1M</sub> = -1565.036698**

**<S<sup>2</sup>> = 8.860**

|    |             |              |              |
|----|-------------|--------------|--------------|
| 26 | 1.161053000 | 0.067916000  | -0.014959000 |
| 8  | 3.014745000 | -0.246761000 | -0.592117000 |
| 8  | 1.185387000 | -1.827544000 | 0.681888000  |
| 6  | 3.774667000 | -1.274428000 | -0.478980000 |
| 6  | 3.390695000 | -2.482141000 | 0.109356000  |
| 1  | 4.113566000 | -3.290668000 | 0.148413000  |
| 6  | 2.110003000 | -2.698483000 | 0.657556000  |
| 8  | 1.303846000 | 2.005585000  | -0.494880000 |
| 8  | 1.108490000 | 0.677284000  | 1.860769000  |
| 6  | 0.962349000 | 3.025314000  | 0.186135000  |
| 6  | 0.708576000 | 2.996655000  | 1.570854000  |

|    |              |              |              |
|----|--------------|--------------|--------------|
| 1  | 0.456336000  | 3.925965000  | 2.071354000  |
| 6  | 0.832553000  | 1.834102000  | 2.339019000  |
| 6  | 1.769630000  | -4.032549000 | 1.270696000  |
| 1  | 2.598965000  | -4.743609000 | 1.223250000  |
| 1  | 1.477390000  | -3.882255000 | 2.316772000  |
| 1  | 0.898884000  | -4.453335000 | 0.753992000  |
| 6  | 5.164384000  | -1.107338000 | -1.035813000 |
| 1  | 5.770774000  | -2.010581000 | -0.926743000 |
| 1  | 5.100802000  | -0.837910000 | -2.096916000 |
| 1  | 5.660386000  | -0.273523000 | -0.524374000 |
| 6  | 0.655205000  | 1.885191000  | 3.833789000  |
| 1  | 0.422231000  | 2.890744000  | 4.194598000  |
| 1  | -0.147184000 | 1.197586000  | 4.126679000  |
| 1  | 1.572679000  | 1.530212000  | 4.318571000  |
| 6  | 0.853249000  | 4.316685000  | -0.579157000 |
| 1  | 0.638392000  | 5.173422000  | 0.065362000  |
| 1  | 1.783761000  | 4.494287000  | -1.130501000 |
| 1  | 0.052271000  | 4.209075000  | -1.320665000 |
| 8  | 0.236915000  | -0.272078000 | -1.742432000 |
| 6  | 0.679087000  | -0.026622000 | -3.066011000 |
| 1  | 1.684343000  | -0.443406000 | -3.194233000 |
| 1  | -0.012150000 | -0.512300000 | -3.768948000 |
| 1  | 0.700099000  | 1.051587000  | -3.264597000 |
| 14 | -1.542730000 | -0.225448000 | -1.251286000 |
| 1  | -1.817459000 | -1.173580000 | -2.404703000 |
| 1  | -0.742476000 | -0.119668000 | 0.151426000  |
| 6  | -3.074210000 | -0.756583000 | -0.212297000 |
| 6  | -4.069505000 | -1.551492000 | -0.801870000 |
| 6  | -3.262443000 | -0.358438000 | 1.120931000  |
| 6  | -5.218367000 | -1.920636000 | -0.098366000 |
| 6  | -4.408860000 | -0.714709000 | 1.831614000  |
| 6  | -5.390698000 | -1.498606000 | 1.220535000  |
| 1  | -3.937407000 | -1.890991000 | -1.830810000 |
| 1  | -2.489305000 | 0.235467000  | 1.611926000  |
| 1  | -5.976755000 | -2.540482000 | -0.575680000 |
| 1  | -4.536445000 | -0.391011000 | 2.864206000  |
| 1  | -6.283026000 | -1.786742000 | 1.774685000  |
| 8  | -1.796345000 | 1.368570000  | -1.740018000 |
| 6  | -3.089501000 | 1.899561000  | -1.942138000 |
| 1  | -3.657399000 | 1.333486000  | -2.697233000 |
| 1  | -3.683144000 | 1.914666000  | -1.016434000 |
| 1  | -2.982476000 | 2.930690000  | -2.303268000 |

## 2.F H atom transfer from FeH(acac)<sub>2</sub> to isobutene

### F1. Energy diagram and views of the optimized geometries

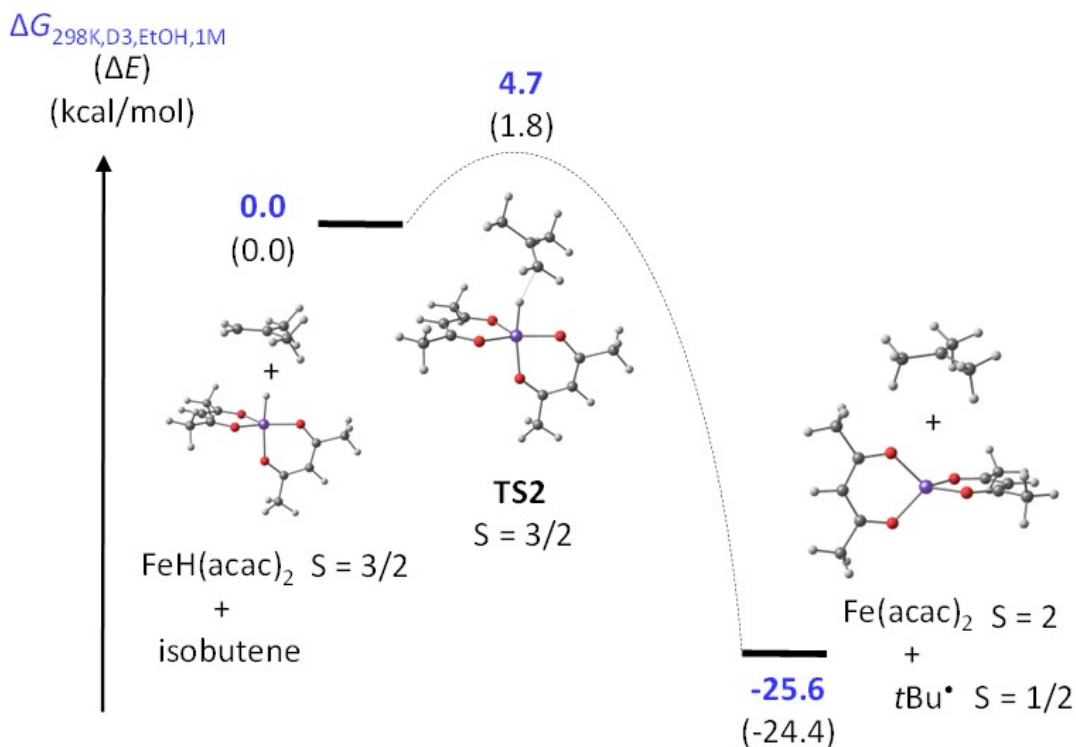

### F2. Cartesian coordinates and energies (gas-phase E and D3-corrected G in EtOH at 298 K, in hartrees) of the optimized geometries.

|                                                  |              |              |              |                               |              |              |              |
|--------------------------------------------------|--------------|--------------|--------------|-------------------------------|--------------|--------------|--------------|
| <b>isobutene</b>                                 |              |              |              | $\langle S^2 \rangle = 4.005$ |              |              |              |
| <b>E = -157.060349441</b>                        |              |              |              | 26                            | -0.338070000 | -0.119499000 | -0.087294000 |
| <b>G<sub>298K,D3,EtOH,1M</sub> = -156.986544</b> |              |              |              | 8                             | -1.353921000 | 1.519981000  | -0.276123000 |
| (restricted closed-shell system, S = 0)          |              |              |              | 6                             | -2.629037000 | 1.693428000  | -0.185184000 |
| 6                                                | -0.000014000 | 1.458999000  | -0.000006000 | 6                             | -3.074514000 | 3.118064000  | -0.400604000 |
| 6                                                | -0.000001000 | 0.121173000  | 0.000019000  | 8                             | 0.726464000  | -0.892169000 | 1.351293000  |
| 1                                                | 0.927266000  | 2.029552000  | 0.000045000  | 6                             | 1.546437000  | -1.866227000 | 1.249280000  |
| 1                                                | -0.927305000 | 2.029535000  | -0.000040000 | 6                             | 1.852970000  | -2.542649000 | 0.056561000  |
| 6                                                | -1.274186000 | -0.677749000 | 0.000004000  | 6                             | 1.275875000  | -2.258051000 | -1.193130000 |
| 1                                                | -1.327377000 | -1.334852000 | 0.880040000  | 8                             | 0.420515000  | -1.335891000 | -1.412797000 |
| 1                                                | -2.160202000 | -0.034456000 | 0.000313000  | 6                             | 2.205245000  | -2.290667000 | 2.539434000  |
| 1                                                | -1.327636000 | -1.334362000 | -0.880381000 | 6                             | 1.658367000  | -3.083893000 | -2.397419000 |
| 6                                                | 1.274198000  | -0.677728000 | 0.000002000  | 8                             | -2.060392000 | -1.105676000 | 0.267036000  |
| 1                                                | 1.327394000  | -1.334880000 | 0.879996000  | 6                             | -3.241220000 | -0.654587000 | 0.299423000  |
| 1                                                | 1.327673000  | -1.334288000 | -0.880425000 | 6                             | -4.337542000 | -1.653221000 | 0.585627000  |
| 1                                                | 2.160203000  | -0.034419000 | 0.000345000  | 6                             | -3.572108000 | 0.704125000  | 0.085267000  |
| <b>TS1</b>                                       |              |              |              | 1                             | -4.314918000 | -2.442118000 | -0.175731000 |
| <b>E = -970.879727691</b>                        |              |              |              | 1                             | 2.742414000  | -1.438366000 | 2.972802000  |
| <b>G<sub>298K,D3,EtOH,1M</sub> = -970.670294</b> |              |              |              | 1                             | 1.432617000  | -2.582128000 | 3.261207000  |
|                                                  |              |              |              | 1                             | -5.331878000 | -1.197651000 | 0.602466000  |

|   |              |              |              |
|---|--------------|--------------|--------------|
| 1 | 2.900928000  | -3.123444000 | 2.403136000  |
| 1 | -4.144560000 | -2.134770000 | 1.551740000  |
| 1 | -4.617068000 | 0.994399000  | 0.133555000  |
| 1 | 2.571427000  | -3.355144000 | 0.107285000  |
| 1 | -2.747445000 | 3.456197000  | -1.391521000 |
| 1 | 2.406319000  | -3.846915000 | -2.164105000 |
| 1 | -4.158873000 | 3.235277000  | -0.321022000 |
| 1 | 0.762343000  | -3.570869000 | -2.801178000 |
| 1 | -2.587365000 | 3.767685000  | 0.336931000  |
| 1 | 2.046461000  | -2.425217000 | -3.183611000 |
| 1 | 0.836837000  | 0.858740000  | -0.370572000 |
| 6 | 1.699179000  | 2.393836000  | -1.019221000 |
| 1 | 0.710657000  | 2.830028000  | -0.886872000 |
| 1 | 1.890880000  | 1.889607000  | -1.965429000 |
| 6 | 2.702512000  | 2.631282000  | -0.142725000 |
| 6 | 4.090458000  | 2.104914000  | -0.361949000 |
| 1 | 4.829146000  | 2.919625000  | -0.342603000 |
| 1 | 4.376508000  | 1.409043000  | 0.440799000  |
| 1 | 4.183579000  | 1.578909000  | -1.317653000 |
| 6 | 2.469852000  | 3.381638000  | 1.135633000  |
| 1 | 3.147204000  | 4.244334000  | 1.217174000  |
| 1 | 1.439066000  | 3.740911000  | 1.215657000  |
| 1 | 2.675378000  | 2.740926000  | 2.005962000  |

**Fe(acac)<sub>2</sub> S = 2**

**E = -813.288650469**

**G<sub>298K,D3,EtOH,IM</sub> = -813.165701**

**<S<sup>2</sup>> = 6.023**

|    |              |              |              |
|----|--------------|--------------|--------------|
| 6  | 3.442438000  | 1.779416000  | 1.780519000  |
| 6  | 2.633102000  | 0.880340000  | 0.880213000  |
| 6  | 3.286717000  | 0.000395000  | 0.000345000  |
| 6  | 2.633895000  | -0.879696000 | -0.879922000 |
| 6  | 3.443996000  | -1.778796000 | -1.779507000 |
| 8  | 1.362953000  | 0.990922000  | 0.990821000  |
| 26 | 0.000000000  | -0.000158000 | -0.000660000 |
| 8  | -1.363633000 | 0.990888000  | -0.991022000 |
| 6  | -2.633727000 | 0.879930000  | -0.879893000 |
| 6  | -3.443660000 | 1.780039000  | -1.778620000 |
| 8  | 1.363820000  | -0.990860000 | -0.991087000 |

|   |              |              |              |
|---|--------------|--------------|--------------|
| 8 | -1.363140000 | -0.991372000 | 0.990407000  |
| 6 | -2.633269000 | -0.880493000 | 0.879856000  |
| 6 | -3.442773000 | -1.780103000 | 1.779477000  |
| 6 | -3.286717000 | -0.000201000 | 0.000213000  |
| 1 | 3.179893000  | 1.577309000  | 2.826093000  |
| 1 | 4.520249000  | 1.649528000  | 1.648942000  |
| 1 | 3.178141000  | 2.825105000  | 1.581488000  |
| 1 | 4.372447000  | 0.000507000  | 0.000713000  |
| 1 | 3.179822000  | -2.824511000 | -1.580432000 |
| 1 | 4.521694000  | -1.648638000 | -1.647273000 |
| 1 | 3.182056000  | -1.576960000 | -2.825282000 |
| 1 | -3.179483000 | -2.825764000 | 1.578890000  |
| 1 | -3.179379000 | -1.579600000 | 2.825130000  |
| 1 | -4.520561000 | -1.649208000 | 1.648703000  |
| 1 | -4.372447000 | -0.000059000 | 0.000630000  |
| 1 | -3.180373000 | 2.825612000  | -1.577531000 |
| 1 | -4.521384000 | 1.649017000  | -1.647451000 |
| 1 | -3.180674000 | 1.580167000  | -2.824490000 |

**tert-butyl radical**

**E = -157.632783362**

**G<sub>298K,D3,EtOH,IM</sub> = -157.552909**

**<S<sup>2</sup>> = 0.754**

|   |              |              |              |
|---|--------------|--------------|--------------|
| 6 | 0.000002000  | -0.000041000 | -0.142150000 |
| 6 | -0.001639000 | 1.484857000  | 0.014322000  |
| 6 | 1.286843000  | -0.741016000 | 0.014321000  |
| 6 | -1.285210000 | -0.743831000 | 0.014323000  |
| 1 | 1.239256000  | -1.740373000 | -0.438651000 |
| 1 | 2.126864000  | -0.199372000 | -0.440835000 |
| 1 | 1.555056000  | -0.893979000 | 1.077822000  |
| 1 | 0.887094000  | 1.943366000  | -0.439691000 |
| 1 | -0.001934000 | 1.793636000  | 1.077824000  |
| 1 | -0.891332000 | 1.941425000  | -0.439756000 |
| 1 | -1.235420000 | -1.743199000 | -0.438422000 |
| 1 | -1.553197000 | -0.897220000 | 1.077825000  |
| 1 | -2.126360000 | -0.204096000 | -0.441012000 |

## 2.G Fe(acac)<sub>2</sub> and EtOH adducts

### G1. Energy diagram and views of the optimized geometries

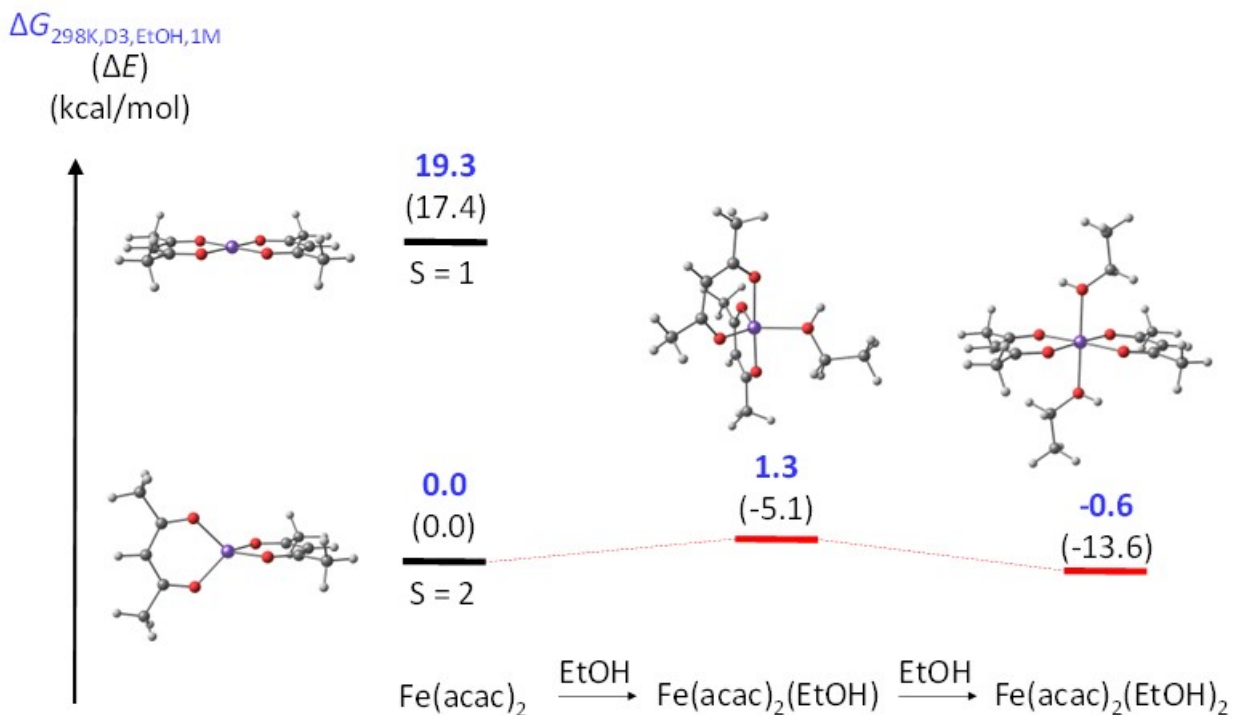

### G2. Cartesian coordinates and energies (gas-phase E and D3-corrected G in EtOH at 298 K, in hartrees) of the optimized geometries.

**Fe(acac)<sub>2</sub> S = 1**

**E = -813.26093563**

**G<sub>298K,D3,EtOH,1M</sub> = -813.134945**

**<S<sup>2</sup>> = 2.014**

|    |              |              |              |
|----|--------------|--------------|--------------|
| 6  | 3.366069000  | 2.516864000  | 0.000166000  |
| 6  | 2.574918000  | 1.234209000  | 0.000032000  |
| 6  | 3.242396000  | 0.000000000  | -0.000029000 |
| 6  | 2.574918000  | -1.234209000 | -0.000050000 |
| 6  | 3.366069000  | -2.516864000 | -0.000144000 |
| 8  | 1.306626000  | 1.385058000  | 0.000051000  |
| 26 | 0.000000000  | 0.000000000  | -0.000010000 |
| 8  | -1.306626000 | -1.385057000 | 0.000154000  |
| 6  | -2.574918000 | -1.234209000 | 0.000097000  |
| 6  | -3.366069000 | -2.516864000 | 0.000012000  |
| 8  | 1.306625000  | -1.385058000 | 0.000009000  |
| 8  | -1.306626000 | 1.385057000  | -0.000250000 |
| 6  | -2.574918000 | 1.234209000  | -0.000093000 |
| 6  | -3.366069000 | 2.516864000  | 0.000019000  |
| 6  | -3.242397000 | 0.000000000  | 0.000043000  |

|   |              |              |              |
|---|--------------|--------------|--------------|
| 1 | 3.093078000  | 3.109914000  | 0.881277000  |
| 1 | 4.445821000  | 2.345043000  | -0.000219000 |
| 1 | 3.092495000  | 3.110465000  | -0.880387000 |
| 1 | 4.327696000  | 0.000000000  | -0.000042000 |
| 1 | 3.092496000  | -3.110442000 | 0.880424000  |
| 1 | 4.445821000  | -2.345043000 | 0.000235000  |
| 1 | 3.093077000  | -3.109937000 | -0.881240000 |
| 1 | -3.092875000 | 3.110058000  | 0.880970000  |
| 1 | -3.092697000 | 3.110321000  | -0.880694000 |
| 1 | -4.445820000 | 2.345044000  | -0.000097000 |
| 1 | -4.327697000 | 0.000000000  | 0.000090000  |
| 1 | -3.092951000 | -3.110028000 | -0.880984000 |
| 1 | -4.445820000 | -2.345044000 | 0.000227000  |
| 1 | -3.092620000 | -3.110352000 | 0.880680000  |

**EtOH**

**E = -154.888989006**

**G<sub>298K,D3,EtOH,1M</sub> = -154.844242**

(restricted closed-shell system, S = 0)

|   |              |             |              |
|---|--------------|-------------|--------------|
| 8 | -0.027152000 | 1.971259000 | -0.796728000 |
| 1 | -0.861659000 | 1.943185000 | -1.293313000 |
| 6 | 0.028174000  | 3.121693000 | 0.059153000  |
| 1 | -0.873064000 | 3.164296000 | 0.688958000  |
| 1 | 0.882544000  | 2.934236000 | 0.716967000  |
| 6 | 0.205894000  | 4.402037000 | -0.735191000 |
| 1 | -0.653022000 | 4.588276000 | -1.392707000 |
| 1 | 1.107802000  | 4.349500000 | -1.354757000 |
| 1 | 0.299195000  | 5.259856000 | -0.057941000 |

**Fe(acac)<sub>2</sub>(EtOH) S = 2**

**E = -968.185759582**

**G<sub>298K,D3,EtOH,1M</sub> = -968.007871**

**<S<sup>2</sup>> = 6.013**

|    |              |              |              |
|----|--------------|--------------|--------------|
| 8  | 0.253532000  | 2.169588000  | -0.828045000 |
| 26 | 0.019108000  | 0.169287000  | -0.032439000 |
| 8  | 0.676705000  | -1.326043000 | -1.190433000 |
| 6  | 1.761867000  | -1.971755000 | -1.021988000 |
| 6  | 1.961854000  | -3.151104000 | -1.954772000 |
| 6  | 2.760538000  | -1.678713000 | -0.070252000 |
| 6  | 2.726056000  | -0.601648000 | 0.831635000  |
| 8  | 1.781124000  | 0.251749000  | 0.931044000  |
| 6  | 3.890953000  | -0.394030000 | 1.779787000  |
| 8  | -1.761332000 | 0.083413000  | -1.197521000 |
| 6  | -2.898866000 | -0.309397000 | -0.807547000 |
| 6  | -3.242111000 | -0.619607000 | 0.529142000  |
| 6  | -2.361307000 | -0.508052000 | 1.610673000  |
| 6  | -2.855671000 | -0.813826000 | 3.010134000  |
| 8  | -1.131817000 | -0.156970000 | 1.537935000  |
| 6  | -3.963536000 | -0.442869000 | -1.883561000 |
| 1  | 1.126724000  | -3.849090000 | -1.834935000 |
| 1  | -4.066608000 | 0.509852000  | -2.414233000 |
| 1  | -3.637734000 | -1.185893000 | -2.619109000 |
| 1  | 2.900960000  | -3.679815000 | -1.778324000 |
| 1  | -4.937571000 | -0.736088000 | -1.485810000 |
| 1  | 1.935959000  | -2.798047000 | -2.991039000 |
| 1  | 3.630883000  | -2.323568000 | -0.045250000 |
| 1  | -4.256999000 | -0.939807000 | 0.732246000  |
| 1  | 3.525979000  | -0.430872000 | 2.811666000  |
| 1  | -3.908327000 | -1.103929000 | 3.033394000  |
| 1  | 4.679814000  | -1.138150000 | 1.651728000  |
| 1  | -2.249609000 | -1.618851000 | 3.439040000  |
| 1  | 4.313317000  | 0.604841000  | 1.625079000  |
| 1  | -2.710361000 | 0.066862000  | 3.644912000  |
| 1  | -0.139156000 | 2.398966000  | -1.673493000 |
| 6  | 0.993279000  | 3.148855000  | -0.094076000 |
| 1  | 0.541114000  | 3.282466000  | 0.895978000  |
| 1  | 2.013216000  | 2.784222000  | 0.077049000  |
| 6  | 1.056982000  | 4.510684000  | -0.808114000 |
| 1  | 0.053012000  | 4.917667000  | -0.965943000 |
| 1  | 1.533208000  | 4.416682000  | -1.789375000 |
| 1  | 1.629433000  | 5.235995000  | -0.220367000 |

**Fe(acac)<sub>2</sub>(EtOH)<sub>2</sub> S = 2**

**E = -1123.08835008**

**G<sub>298K,D3,EtOH,1M</sub> = -1122.855087**

**<S<sup>2</sup>> = 6.018**

|    |              |              |              |
|----|--------------|--------------|--------------|
| 8  | -0.698224000 | 2.097592000  | -0.352979000 |
| 26 | -0.024438000 | 0.073808000  | -0.012522000 |
| 8  | 0.648907000  | -1.950186000 | 0.327558000  |
| 8  | -1.474128000 | -0.213906000 | 1.411108000  |
| 6  | -2.635670000 | -0.715315000 | 1.291581000  |
| 6  | -3.214204000 | -1.143101000 | 0.079392000  |
| 6  | -2.558573000 | -1.103116000 | -1.167848000 |
| 8  | -1.387120000 | -0.651514000 | -1.364493000 |
| 6  | -3.434610000 | -0.845097000 | 2.571925000  |
| 6  | -3.278924000 | -1.627937000 | -2.392619000 |
| 8  | 1.451528000  | 0.283698000  | -1.422532000 |
| 6  | 2.668638000  | 0.617903000  | -1.274627000 |
| 6  | 3.265406000  | 0.989842000  | -0.052923000 |
| 6  | 2.590842000  | 1.005867000  | 1.184727000  |
| 6  | 3.357049000  | 1.391941000  | 2.433043000  |
| 8  | 1.363817000  | 0.721251000  | 1.352972000  |
| 6  | 3.514124000  | 0.608524000  | -2.531398000 |
| 1  | -3.508324000 | 0.136145000  | 3.056213000  |
| 1  | -2.899867000 | -1.503004000 | 3.268380000  |
| 1  | -4.440528000 | -1.243815000 | 2.408404000  |
| 1  | -4.220547000 | -1.551309000 | 0.112214000  |
| 1  | -4.296866000 | -1.966471000 | -2.176338000 |
| 1  | -3.313113000 | -0.843988000 | -3.158813000 |
| 1  | -2.709130000 | -2.463139000 | -2.818790000 |
| 1  | 3.343266000  | 0.553989000  | 3.141202000  |
| 1  | 4.396399000  | 1.666206000  | 2.227818000  |
| 1  | 2.851503000  | 2.231394000  | 2.925530000  |
| 1  | 4.317952000  | 1.259096000  | -0.062106000 |
| 1  | 3.048472000  | 1.251209000  | -3.288321000 |
| 1  | 4.541618000  | 0.942170000  | -2.356694000 |
| 1  | 3.535380000  | -0.406652000 | -2.947093000 |
| 1  | -0.116496000 | 2.570116000  | 0.246949000  |
| 1  | 0.066891000  | -2.422499000 | -0.272256000 |
| 6  | -2.062159000 | 2.483908000  | -0.164982000 |
| 1  | -2.707089000 | 1.874220000  | -0.809077000 |
| 1  | -2.363732000 | 2.270585000  | 0.867519000  |
| 6  | -2.310073000 | 3.972638000  | -0.466162000 |
| 1  | -2.047824000 | 4.211825000  | -1.501785000 |
| 1  | -1.702580000 | 4.610370000  | 0.184031000  |
| 1  | -3.362231000 | 4.234569000  | -0.312610000 |
| 6  | 2.012689000  | -2.336843000 | 0.139154000  |
| 1  | 2.314037000  | -2.123501000 | -0.893409000 |
| 1  | 2.657955000  | -1.727386000 | 0.783131000  |
| 6  | 2.260292000  | -3.825666000 | 0.440124000  |
| 1  | 1.652454000  | -4.463176000 | -0.209964000 |
| 1  | 1.998263000  | -4.064884000 | 1.475796000  |
| 1  | 3.312339000  | -4.087860000 | 0.286261000  |

## 2.H *t*Bu<sup>•</sup> trapping by Fe(acac)<sub>2</sub>

### H1. Energy diagram and views of the optimized geometries

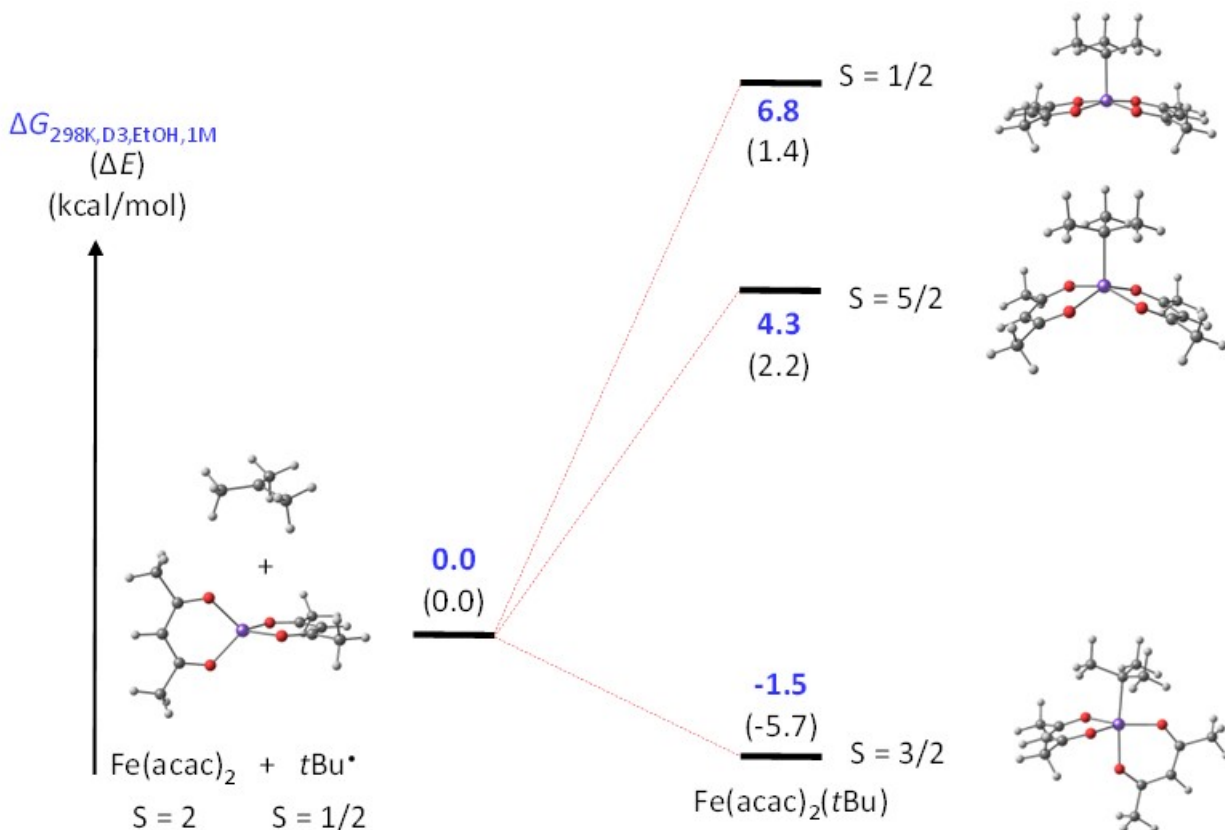

### H2. Cartesian coordinates and energies (gas-phase E and D3-corrected G in EtOH at 298 K, in hartrees) of the optimized geometries.

|                                                  |              |              |              |   |              |              |              |
|--------------------------------------------------|--------------|--------------|--------------|---|--------------|--------------|--------------|
| <b>Fe(acac)<sub>2</sub>(<i>t</i>Bu) S = 1/2</b>  |              |              |              | 6 | -2.548523000 | -1.136163000 | -0.721836000 |
| <b>E = -970.91921492</b>                         |              |              |              | 6 | -3.327091000 | -2.397671000 | -0.997025000 |
| <b>G<sub>298K,D3,EtOH,1M</sub> = -970.707712</b> |              |              |              | 6 | -3.195668000 | 0.107604000  | -0.738384000 |
| <b>&lt;S<sup>2</sup>&gt; = 0.882</b>             |              |              |              | 1 | -2.874354000 | -2.927709000 | -1.843357000 |
| 26                                               | -0.017945000 | 0.033945000  | -0.172487000 | 1 | 3.179003000  | -3.104135000 | -0.245004000 |
| 8                                                | -1.277352000 | 1.436875000  | -0.278487000 | 1 | 2.852407000  | -2.873760000 | -1.961032000 |
| 6                                                | -2.524971000 | 1.323063000  | -0.538607000 | 1 | -4.379785000 | -2.199111000 | -1.216798000 |
| 6                                                | -3.277010000 | 2.626540000  | -0.627665000 | 1 | 4.348567000  | -2.206234000 | -1.251198000 |
| 8                                                | 1.267528000  | -1.298066000 | -0.565249000 | 1 | -3.261386000 | -3.065886000 | -0.129687000 |
| 6                                                | 2.520867000  | -1.133477000 | -0.762888000 | 1 | -4.259895000 | 0.133161000  | -0.951701000 |
| 6                                                | 3.182832000  | 0.102072000  | -0.734751000 | 1 | 4.249682000  | 0.123587000  | -0.934743000 |
| 6                                                | 2.509076000  | 1.318424000  | -0.551297000 | 1 | -2.793176000 | 3.276087000  | -1.366540000 |
| 8                                                | 1.257390000  | 1.429966000  | -0.317442000 | 1 | 4.317468000  | 2.481094000  | -0.883382000 |
| 6                                                | 3.285902000  | -2.394990000 | -1.074845000 | 1 | -4.326695000 | 2.486729000  | -0.900715000 |
| 6                                                | 3.259705000  | 2.622618000  | -0.644370000 | 1 | 2.796602000  | 3.255066000  | -1.410963000 |
| 8                                                | -1.300722000 | -1.311776000 | -0.495160000 | 1 | -3.223603000 | 3.145487000  | 0.337307000  |

|   |              |              |             |
|---|--------------|--------------|-------------|
| 1 | 3.175079000  | 3.160817000  | 0.307601000 |
| 6 | 0.052341000  | -0.273464000 | 1.851165000 |
| 6 | -1.241263000 | 0.307205000  | 2.403981000 |
| 6 | 1.263223000  | 0.459711000  | 2.402568000 |
| 1 | 2.200111000  | 0.101810000  | 1.959630000 |
| 1 | 1.193038000  | 1.540725000  | 2.246534000 |
| 1 | 1.325604000  | 0.277272000  | 3.489697000 |
| 1 | -1.292440000 | 1.391793000  | 2.266759000 |
| 1 | -1.288220000 | 0.100265000  | 3.487218000 |
| 1 | -2.131154000 | -0.144566000 | 1.950172000 |
| 6 | 0.140225000  | -1.770047000 | 2.105395000 |
| 1 | 1.073057000  | -2.194936000 | 1.724135000 |
| 1 | 0.102919000  | -1.954177000 | 3.193184000 |
| 1 | -0.688872000 | -2.310476000 | 1.639608000 |

**Fe(acac)<sub>2</sub>(tBu) S = 3/2**

**E = -970.930552924**

**G<sub>298K,D3,EtOH,1M</sub> = -970.721069**

**<S<sup>2</sup>> = 4.183**

|    |              |              |              |
|----|--------------|--------------|--------------|
| 26 | 0.101423000  | 0.282979000  | 0.000393000  |
| 8  | 1.975684000  | 0.806097000  | 0.000856000  |
| 6  | 3.046300000  | 0.085575000  | 0.000043000  |
| 6  | 4.328222000  | 0.880233000  | -0.000437000 |
| 8  | -1.197454000 | -0.121103000 | -1.421542000 |
| 6  | -2.261230000 | -0.807723000 | -1.248537000 |
| 6  | -2.807564000 | -1.155815000 | -0.000511000 |
| 6  | -2.262343000 | -0.806991000 | 1.247786000  |
| 8  | -1.198649000 | -0.120360000 | 1.421302000  |
| 6  | -2.956242000 | -1.250069000 | -2.513580000 |
| 6  | -2.958488000 | -1.248493000 | 2.512493000  |
| 8  | 0.754469000  | -1.677720000 | 0.001483000  |
| 6  | 1.934079000  | -2.123311000 | 0.000618000  |
| 6  | 2.090458000  | -3.627127000 | 0.000732000  |
| 6  | 3.091239000  | -1.304708000 | -0.000268000 |
| 1  | 1.588191000  | -4.041990000 | 0.882805000  |
| 1  | -3.171492000 | -0.374914000 | -3.138283000 |
| 1  | -2.280207000 | -1.894895000 | -3.088531000 |
| 1  | 3.136885000  | -3.945925000 | -0.000344000 |
| 1  | -3.886269000 | -1.791256000 | -2.317915000 |
| 1  | 1.586223000  | -4.042349000 | -0.880043000 |
| 1  | 4.064876000  | -1.784861000 | -0.000938000 |
| 1  | -3.723507000 | -1.738892000 | -0.000753000 |
| 1  | 4.353883000  | 1.532477000  | 0.881216000  |
| 1  | -3.888300000 | -1.789879000 | 2.316350000  |
| 1  | 5.216691000  | 0.242658000  | -0.000917000 |
| 1  | -2.282942000 | -1.892855000 | 3.088535000  |
| 1  | 4.353102000  | 1.532699000  | -0.881949000 |
| 1  | -3.174387000 | -0.372905000 | 3.136365000  |
| 6  | -0.377340000 | 2.392553000  | -0.000321000 |
| 6  | 0.265632000  | 2.884419000  | -1.277877000 |
| 6  | 0.264577000  | 2.884697000  | 1.277670000  |
| 1  | -0.174937000 | 2.396365000  | 2.156598000  |

|   |              |             |              |
|---|--------------|-------------|--------------|
| 1 | 1.345627000  | 2.713679000 | 1.277829000  |
| 1 | 0.092884000  | 3.970464000 | 1.386678000  |
| 1 | 1.346689000  | 2.713462000 | -1.277080000 |
| 1 | 0.093954000  | 3.970146000 | -1.387296000 |
| 1 | -0.173093000 | 2.395858000 | -2.157077000 |
| 6 | -1.883812000 | 2.528090000 | -0.000958000 |
| 1 | -2.335336000 | 2.080632000 | 0.889811000  |
| 1 | -2.144238000 | 3.601436000 | -0.001386000 |
| 1 | -2.334644000 | 2.080100000 | -0.891809000 |

**Fe(acac)<sub>2</sub>(tBu) S = 5/2**

**E = -970.917939319**

**G<sub>298K,D3,EtOH,1M</sub> = -970.711792**

**<S<sup>2</sup>> = 8.758**

|    |              |              |              |
|----|--------------|--------------|--------------|
| 26 | -0.002563000 | -0.019360000 | 0.141332000  |
| 8  | -1.427934000 | 1.397235000  | -0.008255000 |
| 6  | -2.592832000 | 1.348360000  | -0.522132000 |
| 6  | -3.386306000 | 2.630302000  | -0.461832000 |
| 8  | 1.453052000  | -1.232708000 | -0.547155000 |
| 6  | 2.605922000  | -0.957498000 | -1.018155000 |
| 6  | 3.146647000  | 0.335797000  | -1.100157000 |
| 6  | 2.472455000  | 1.480416000  | -0.643984000 |
| 8  | 1.301331000  | 1.481573000  | -0.139407000 |
| 6  | 3.410650000  | -2.138856000 | -1.501249000 |
| 6  | 3.142551000  | 2.829475000  | -0.730436000 |
| 8  | -1.315557000 | -1.248466000 | -0.744088000 |
| 6  | -2.493007000 | -1.028758000 | -1.185636000 |
| 6  | -3.180222000 | -2.215424000 | -1.814625000 |
| 6  | -3.156765000 | 0.205646000  | -1.114911000 |
| 1  | -2.575619000 | -2.578845000 | -2.654324000 |
| 1  | 3.540306000  | -2.850087000 | -0.676582000 |
| 1  | 2.849134000  | -2.660359000 | -2.285767000 |
| 1  | -4.188135000 | -1.981780000 | -2.168917000 |
| 1  | 4.392408000  | -1.852241000 | -1.888608000 |
| 1  | -3.232828000 | -3.031656000 | -1.084071000 |
| 1  | -4.159287000 | 0.277184000  | -1.524824000 |
| 1  | 4.141513000  | 0.454226000  | -1.517780000 |
| 1  | -2.828476000 | 3.423295000  | -0.974288000 |
| 1  | 4.141721000  | 2.778729000  | -1.172178000 |
| 1  | -4.378273000 | 2.536209000  | -0.912638000 |
| 1  | 2.516337000  | 3.505324000  | -1.325137000 |
| 1  | -3.492022000 | 2.940470000  | 0.584726000  |
| 1  | 3.212877000  | 3.262565000  | 0.274659000  |
| 6  | -0.000789000 | -0.561520000 | 2.250516000  |
| 6  | -1.227712000 | 0.071048000  | 2.878283000  |
| 6  | 1.302178000  | -0.011877000 | 2.800581000  |
| 1  | 2.174854000  | -0.427754000 | 2.280619000  |
| 1  | 1.351762000  | 1.081581000  | 2.725096000  |
| 1  | 1.408076000  | -0.271785000 | 3.870851000  |
| 1  | -1.214360000 | 1.164867000  | 2.798528000  |
| 1  | -1.280369000 | -0.180672000 | 3.954399000  |
| 1  | -2.156301000 | -0.289958000 | 2.417538000  |

|   |              |              |             |   |              |              |             |
|---|--------------|--------------|-------------|---|--------------|--------------|-------------|
| 6 | -0.051112000 | -2.077859000 | 2.231115000 | 1 | -0.024908000 | -2.476534000 | 3.262809000 |
| 1 | 0.800273000  | -2.506500000 | 1.688910000 | 1 | -0.969137000 | -2.449499000 | 1.759301000 |

## 2.1 *t*Bu<sup>•</sup> addition to methyl acrylate

### 11. Energy diagram and views of the optimized geometries

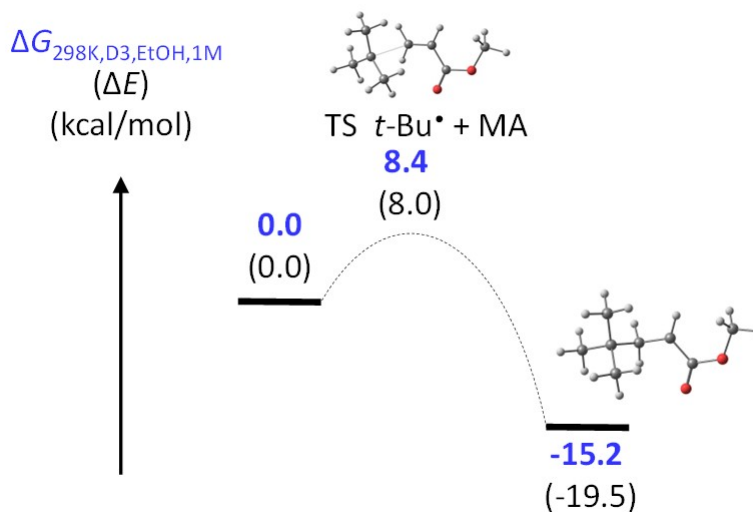

### 12. Cartesian coordinates and energies (gas-phase E and D3-corrected G in EtOH at 298 K, in hartrees) of the optimized geometries.

|                                                                |              |              |              |                                                          |              |              |              |
|----------------------------------------------------------------|--------------|--------------|--------------|----------------------------------------------------------|--------------|--------------|--------------|
| <b>Methyl acrylate</b>                                         | 1            | -3.360571000 | 1.812395000  | 0.952695000                                              |              |              |              |
| <b>E = -306.168903475</b>                                      | 1            | -1.691669000 | 2.200140000  | 0.520865000                                              |              |              |              |
| <b>G<sub>298K,D3,EtOH,1M</sub> = -306.114831</b>               | 6            | -1.512007000 | -0.404354000 | 1.458246000                                              |              |              |              |
| (restricted closed-shell system, S = 0)                        | 1            | -2.217074000 | -0.534765000 | 2.299585000                                              |              |              |              |
| 6                                                              | 0.011509000  | 0.488734000  | 0.000095000  | 1                                                        | -1.044490000 | -1.376226000 | 1.264457000  |
| 6                                                              | 1.494207000  | 0.384684000  | 0.000100000  | 1                                                        | -0.729159000 | 0.283594000  | 1.799885000  |
| 8                                                              | -0.593443000 | 1.548943000  | -0.000112000 | 6                                                        | -3.132687000 | -0.802884000 | -0.482690000 |
| 8                                                              | -0.603519000 | -0.730174000 | 0.000196000  | 1                                                        | -2.710404000 | -1.811563000 | -0.565710000 |
| 6                                                              | -2.049689000 | -0.673309000 | -0.000097000 | 1                                                        | -4.097953000 | -0.905067000 | 0.046631000  |
| 1                                                              | -2.415680000 | -0.145478000 | -0.893274000 | 1                                                        | -3.367581000 | -0.437277000 | -1.491006000 |
| 1                                                              | -2.380699000 | -1.718537000 | -0.003494000 | 6                                                        | 0.867450000  | 0.447693000  | -0.774069000 |
| 1                                                              | -2.416181000 | -0.151408000 | 0.896397000  | 1                                                        | 1.176449000  | 1.489311000  | -0.754931000 |
| 1                                                              | 1.994300000  | 1.356592000  | 0.000224000  | 6                                                        | 1.691381000  | -0.589151000 | -0.124685000 |
| 6                                                              | 2.184457000  | -0.765400000 | -0.000117000 | 8                                                        | 2.911616000  | -0.240793000 | 0.376203000  |
| 1                                                              | 1.673742000  | -1.730556000 | -0.000248000 | 8                                                        | 1.346241000  | -1.750187000 | -0.008425000 |
| 1                                                              | 3.277312000  | -0.769019000 | -0.000153000 | 6                                                        | 3.415846000  | 1.079960000  | 0.230269000  |
|                                                                |              |              |              | 1                                                        | 3.483915000  | 1.380815000  | -0.823347000 |
| <b>Me<sub>3</sub>C<sup>•</sup>CH<sub>2</sub>=CHCOOMe (TS3)</b> | 1            | 2.813132000  | 1.814091000  | 0.782117000                                              |              |              |              |
| <b>E = -463.788969776</b>                                      | 1            | 4.422052000  | 1.062310000  | 0.657380000                                              |              |              |              |
| <b>G<sub>298K,D3,EtOH,1M</sub> = -463.654306</b>               | 6            | -0.294356000 | 0.091242000  | -1.371687000                                             |              |              |              |
| <b>&lt;S<sup>2</sup>&gt; = 0.763</b>                           | 1            | -0.538985000 | -0.963150000 | -1.469087000                                             |              |              |              |
| 6                                                              | -2.218770000 | 0.125269000  | 0.253280000  | 1                                                        | -0.878339000 | 0.808487000  | -1.941712000 |
| 6                                                              | -2.552836000 | 1.583869000  | 0.233255000  |                                                          |              |              |              |
| 1                                                              | -2.906313000 | 1.914880000  | -0.751557000 |                                                          |              |              |              |
|                                                                |              |              |              | <b>Me<sub>3</sub>C-CH<sub>2</sub>CH<sup>•</sup>COOMe</b> |              |              |              |



|                                                  |              |              |              |   |              |              |              |
|--------------------------------------------------|--------------|--------------|--------------|---|--------------|--------------|--------------|
| <b>E = -463.832774967</b>                        |              |              |              | 1 | -3.899724541 | -0.908572025 | -0.120752268 |
| <b>G<sub>298K,D3,EtOH,1M</sub> = -463.691982</b> |              |              |              | 1 | -3.169352541 | -0.440782025 | -1.658389268 |
| <b>&lt;S<sup>2</sup>&gt; = 0.758</b>             |              |              |              | 6 | 0.669221541  | 0.451198025  | -0.606685732 |
| 6                                                | -2.020541541 | 0.121763975  | 0.085896732  | 1 | 0.978220541  | 1.492816025  | -0.587547732 |
| 6                                                | -2.354607541 | 1.580363975  | 0.065871732  | 6 | 1.493152541  | -0.585645975 | 0.042698268  |
| 1                                                | -2.708084541 | 1.911374975  | -0.918940268 | 8 | 2.713387541  | -0.237287975 | 0.543586268  |
| 1                                                | -3.162342541 | 1.808889975  | 0.785311732  | 8 | 1.148012541  | -1.746681975 | 0.158958268  |
| 1                                                | -1.493440541 | 2.196634975  | 0.353481732  | 6 | 3.217617541  | 1.083465025  | 0.397652268  |
| 6                                                | -1.313778541 | -0.407859025 | 1.290862732  | 1 | 3.285686541  | 1.384320025  | -0.655963732 |
| 1                                                | -2.018845541 | -0.538270025 | 2.132201732  | 1 | 2.614903541  | 1.817596025  | 0.949500268  |
| 1                                                | -0.846261541 | -1.379731025 | 1.097073732  | 1 | 4.223823541  | 1.065815025  | 0.824763268  |
| 1                                                | -0.530930541 | 0.280088975  | 1.632501732  | 6 | -0.492584459 | 0.094747025  | -1.204303732 |
| 6                                                | -2.934458541 | -0.806389025 | -0.650073268 | 1 | -0.737213459 | -0.959644975 | -1.301703732 |
| 1                                                | -2.512175541 | -1.815068025 | -0.733093268 | 1 | -1.076567459 | 0.811992025  | -1.774328732 |

## 2.J Me'CH(COOMe) trapping by Fe(acac)<sub>2</sub>

### J1. Energy diagram and views of the optimized geometries

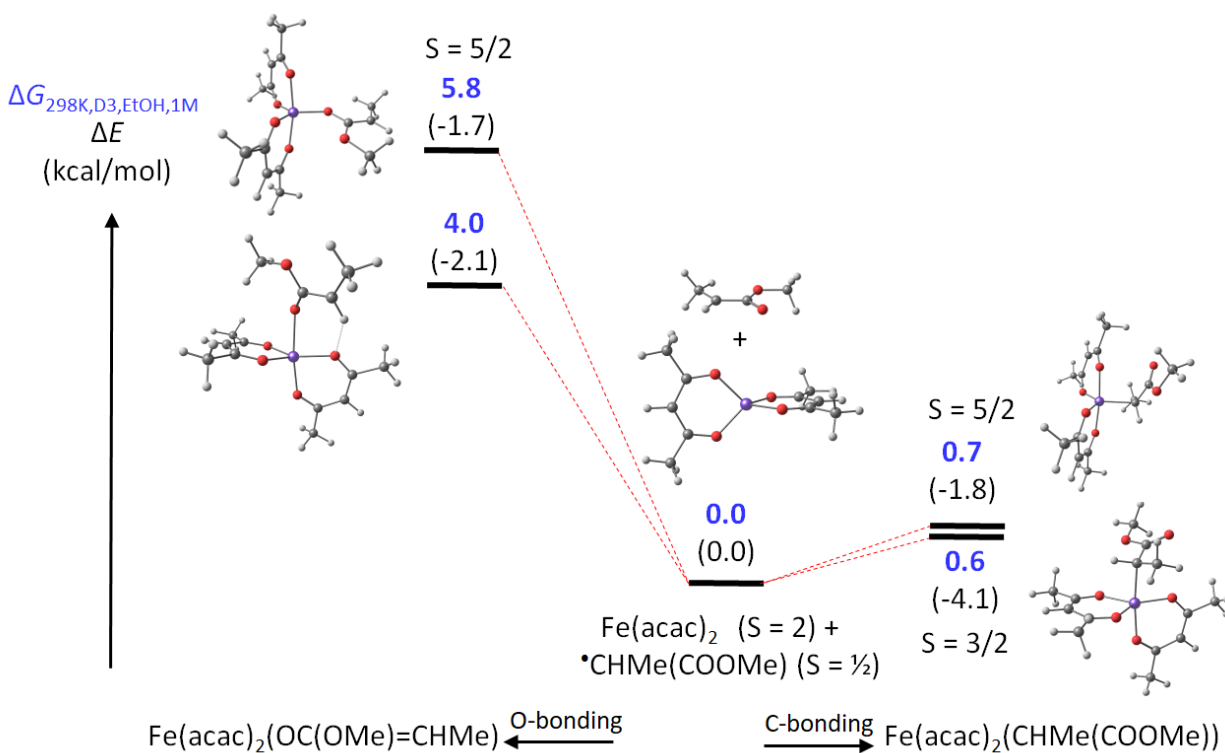

### J2. Cartesian coordinates and energies (gas-phase E and D3-corrected G in EtOH at 298 K, in hartrees) of the optimized geometries.

|                                                  |  |  |  |   |              |              |              |
|--------------------------------------------------|--|--|--|---|--------------|--------------|--------------|
| <b>Me'CHMeCOOMe</b>                              |  |  |  | 6 | -0.077502000 | 0.518816000  | 0.000108000  |
| <b>E = -306.750548945</b>                        |  |  |  | 6 | 1.370456000  | 0.517017000  | -0.000014000 |
| <b>G<sub>298K,D3,EtOH,1M</sub> = -306.691179</b> |  |  |  | 8 | -0.764290000 | 1.532794000  | -0.000002000 |
| <b>&lt;S<sup>2</sup>&gt; = 0.757</b>             |  |  |  | 8 | -0.609917000 | -0.734258000 | 0.000014000  |

|   |              |              |              |
|---|--------------|--------------|--------------|
| 6 | -2.036890000 | -0.768854000 | -0.000046000 |
| 1 | -2.439767000 | -0.269726000 | -0.888289000 |
| 1 | -2.309531000 | -1.826436000 | -0.000137000 |
| 1 | -2.439836000 | -0.269860000 | 0.888241000  |
| 1 | 1.819457000  | 1.507644000  | -0.000075000 |
| 6 | 2.232089000  | -0.688536000 | -0.000018000 |
| 1 | 1.641907000  | -1.607777000 | -0.000200000 |
| 1 | 2.896399000  | -0.696294000 | -0.877977000 |
| 1 | 2.896114000  | -0.696497000 | 0.878161000  |

**Fe(acac)<sub>2</sub>(CHMeCOOMe) S = 3/2**  
**E = -1120.04576948**

**G<sub>298K,D3,EtOH,1M</sub> = -1119.855942**  
**<S<sup>2</sup>> = 4.016**

|    |              |              |              |
|----|--------------|--------------|--------------|
| 26 | -0.107089000 | 0.031460000  | -0.311072000 |
| 8  | 1.585151000  | 0.970355000  | -0.514313000 |
| 6  | 1.904562000  | 2.190009000  | -0.239009000 |
| 6  | 3.339710000  | 2.538965000  | -0.544601000 |
| 8  | -0.930338000 | -0.985246000 | 1.158906000  |
| 6  | -2.184175000 | -1.208757000 | 1.263464000  |
| 6  | -3.131729000 | -1.005399000 | 0.244638000  |
| 6  | -2.844562000 | -0.518309000 | -1.042789000 |
| 8  | -1.682400000 | -0.198844000 | -1.467449000 |
| 6  | -2.635018000 | -1.740832000 | 2.602375000  |
| 6  | -3.964574000 | -0.350761000 | -2.041051000 |
| 8  | -0.878990000 | 1.796072000  | 0.438009000  |
| 6  | -0.305828000 | 2.906319000  | 0.607920000  |
| 6  | -1.147652000 | 4.022508000  | 1.183569000  |
| 6  | 1.054104000  | 3.153260000  | 0.293696000  |
| 1  | -2.008883000 | 4.199566000  | 0.528307000  |
| 1  | -2.070113000 | -2.648973000 | 2.844542000  |
| 1  | -2.402045000 | -1.002528000 | 3.379565000  |
| 1  | -0.590536000 | 4.956022000  | 1.305289000  |
| 1  | -3.705408000 | -1.963574000 | 2.630124000  |
| 1  | -1.544430000 | 3.709985000  | 2.156875000  |
| 1  | 1.455794000  | 4.145018000  | 0.476935000  |
| 1  | -4.166709000 | -1.244641000 | 0.469381000  |
| 1  | 3.539541000  | 2.363481000  | -1.608868000 |
| 1  | -4.931337000 | -0.681787000 | -1.651294000 |
| 1  | 3.579548000  | 3.577753000  | -0.301133000 |
| 1  | -4.035990000 | 0.705824000  | -2.327266000 |
| 1  | 4.005308000  | 1.874239000  | 0.019768000  |
| 1  | -3.729996000 | -0.913671000 | -2.952417000 |
| 6  | 0.885751000  | -1.712977000 | -1.117747000 |
| 6  | 1.326275000  | -1.247246000 | -2.487622000 |
| 1  | 0.464743000  | -0.978608000 | -3.111923000 |
| 1  | 2.002064000  | -0.388678000 | -2.423688000 |
| 1  | 1.862576000  | -2.063364000 | -3.003940000 |
| 1  | 0.334913000  | -2.634407000 | -1.235834000 |
| 6  | 1.962314000  | -2.127826000 | -0.097692000 |
| 8  | 2.852225000  | -2.927507000 | -0.310777000 |
| 8  | 1.829944000  | -1.504158000 | 1.101208000  |

|   |             |              |             |
|---|-------------|--------------|-------------|
| 6 | 2.896922000 | -2.001387000 | 1.913132000 |
| 1 | 3.793573000 | -1.378248000 | 1.819199000 |
| 1 | 2.617065000 | -2.019483000 | 2.972594000 |
| 1 | 3.173301000 | -3.022663000 | 1.627267000 |

**Fe(acac)<sub>2</sub>(CHMeCOOMe) S = 5/2**  
**E = -1120.04215532**

**G<sub>298K,D3,EtOH,1M</sub> = -1119.855716**  
**<S<sup>2</sup>> = 8.760**

|    |              |              |              |
|----|--------------|--------------|--------------|
| 26 | 0.273186000  | 0.278721000  | -0.033523000 |
| 8  | -1.342506000 | -0.156369000 | -1.117011000 |
| 6  | -2.427868000 | 0.509864000  | -1.199784000 |
| 6  | -3.628917000 | -0.253150000 | -1.683451000 |
| 8  | 1.425321000  | -0.665133000 | -1.309104000 |
| 6  | 2.699598000  | -0.778543000 | -1.357028000 |
| 6  | 3.588275000  | -0.180860000 | -0.453257000 |
| 6  | 3.171364000  | 0.614936000  | 0.628795000  |
| 8  | 1.954191000  | 0.875109000  | 0.902158000  |
| 6  | 3.224592000  | -1.625896000 | -2.486337000 |
| 6  | 4.195324000  | 1.222589000  | 1.553474000  |
| 8  | -0.297472000 | 2.164485000  | -0.116668000 |
| 6  | -1.462664000 | 2.631187000  | -0.379152000 |
| 6  | -1.630849000 | 4.107325000  | -0.129030000 |
| 6  | -2.535074000 | 1.873189000  | -0.865210000 |
| 1  | -1.399292000 | 4.325927000  | 0.920311000  |
| 1  | 2.803326000  | -2.635056000 | -2.404221000 |
| 1  | 2.877146000  | -1.211728000 | -3.440422000 |
| 1  | -2.639478000 | 4.461081000  | -0.359364000 |
| 1  | 4.316164000  | -1.688224000 | -2.493680000 |
| 1  | -0.905352000 | 4.660428000  | -0.737860000 |
| 1  | -3.488502000 | 2.368067000  | -1.019751000 |
| 1  | 4.652082000  | -0.342126000 | -0.595303000 |
| 1  | -3.863649000 | -1.008265000 | -0.922138000 |
| 1  | 5.220403000  | 0.952987000  | 1.284825000  |
| 1  | -4.500967000 | 0.386483000  | -1.844823000 |
| 1  | 4.091466000  | 2.314259000  | 1.536234000  |
| 1  | -3.380730000 | -0.783429000 | -2.609912000 |
| 1  | 3.992020000  | 0.898783000  | 2.581224000  |
| 6  | -0.412083000 | -0.779897000 | 1.720735000  |
| 6  | -0.989944000 | 0.286905000  | 2.623222000  |
| 1  | -0.285007000 | 1.113652000  | 2.769246000  |
| 1  | -1.924393000 | 0.682462000  | 2.209728000  |
| 1  | -1.229855000 | -0.120859000 | 3.618119000  |
| 1  | 0.551699000  | -1.192917000 | 2.034344000  |
| 6  | -1.349710000 | -1.811933000 | 1.266545000  |
| 8  | -2.570741000 | -1.740718000 | 1.288125000  |
| 8  | -0.692679000 | -2.899726000 | 0.770972000  |
| 6  | -1.537860000 | -3.906621000 | 0.221276000  |
| 1  | -2.080219000 | -3.524180000 | -0.651265000 |
| 1  | -0.876112000 | -4.723733000 | -0.076510000 |
| 1  | -2.267611000 | -4.256111000 | 0.960242000  |

**Fe(acac)<sub>2</sub>[O(MeO)C=CHMe] S = 3/2**

**E = -1120.04254694**

**G<sub>298K,D3,EtOH,1M</sub> = -1119.850568**

**<S<sup>2</sup>> = 4.758**

|    |              |              |              |
|----|--------------|--------------|--------------|
| 26 | 0.496253000  | 0.333725000  | 0.165568000  |
| 8  | 2.227566000  | 1.293401000  | -0.287761000 |
| 8  | 1.583159000  | -1.319743000 | 0.416150000  |
| 6  | 3.416239000  | 0.858067000  | -0.282984000 |
| 6  | 3.776891000  | -0.474993000 | 0.021881000  |
| 1  | 4.829921000  | -0.739086000 | -0.002620000 |
| 6  | 2.856993000  | -1.476051000 | 0.340625000  |
| 8  | -0.635104000 | 0.773116000  | -1.408540000 |
| 8  | -0.353810000 | 1.748222000  | 1.262153000  |
| 6  | -1.558240000 | 1.652600000  | -1.441652000 |
| 6  | -1.940118000 | 2.474121000  | -0.364207000 |
| 1  | -2.744017000 | 3.183775000  | -0.538115000 |
| 6  | -1.318547000 | 2.496343000  | 0.901167000  |
| 6  | 3.348173000  | -2.875790000 | 0.624390000  |
| 1  | 4.438929000  | -2.953475000 | 0.600417000  |
| 1  | 2.984609000  | -3.197574000 | 1.607825000  |
| 1  | 2.928803000  | -3.568948000 | -0.116266000 |
| 6  | 4.495058000  | 1.856424000  | -0.635300000 |
| 1  | 5.499937000  | 1.425204000  | -0.603523000 |
| 1  | 4.305422000  | 2.253594000  | -1.639898000 |
| 1  | 4.443421000  | 2.704018000  | 0.058502000  |
| 6  | -1.797101000 | 3.485908000  | 1.938768000  |
| 1  | -2.650981000 | 4.079362000  | 1.599073000  |
| 1  | -2.069746000 | 2.948536000  | 2.855011000  |
| 1  | -0.973066000 | 4.161620000  | 2.198947000  |
| 6  | -2.266435000 | 1.801925000  | -2.769183000 |
| 1  | -3.080174000 | 2.532249000  | -2.735993000 |
| 1  | -1.540508000 | 2.111928000  | -3.531048000 |
| 1  | -2.664341000 | 0.830028000  | -3.085103000 |
| 8  | -1.256096000 | -0.937877000 | 0.860636000  |
| 6  | -1.792604000 | -1.920741000 | 0.331628000  |
| 8  | -3.132364000 | -2.068499000 | 0.317774000  |
| 6  | -3.870076000 | -1.009294000 | 0.937677000  |
| 1  | -3.645975000 | -0.961452000 | 2.009137000  |
| 1  | -3.620213000 | -0.044221000 | 0.484129000  |
| 1  | -4.922576000 | -1.253693000 | 0.779762000  |
| 6  | -1.066581000 | -2.993352000 | -0.296387000 |
| 1  | 0.014552000  | -2.872478000 | -0.254737000 |
| 6  | -1.685545000 | -4.168191000 | -0.951538000 |
| 1  | -1.305446000 | -5.103357000 | -0.512898000 |
| 1  | -2.775362000 | -4.158575000 | -0.872433000 |
| 1  | -1.411228000 | -4.205113000 | -2.017555000 |

**Fe(acac)<sub>2</sub>[O(MeO)C=CHMe] S = 5/2**

**E = -1120.04192241**

**G<sub>298K,D3,EtOH,1M</sub> = -1119.847568**

**<S<sup>2</sup>> = 8.776**

|    |              |              |              |
|----|--------------|--------------|--------------|
| 26 | 0.297710000  | 0.171968000  | -0.042848000 |
| 8  | 1.731783000  | -0.247694000 | 1.331340000  |
| 6  | 2.994764000  | -0.227944000 | 1.217396000  |
| 6  | 3.776022000  | -0.617570000 | 2.449018000  |
| 8  | -0.498806000 | 1.398555000  | 1.265515000  |
| 6  | -1.463965000 | 2.235250000  | 1.154925000  |
| 6  | -2.176421000 | 2.485649000  | -0.020703000 |
| 6  | -1.903316000 | 1.833274000  | -1.241469000 |
| 8  | -1.002504000 | 0.955329000  | -1.399478000 |
| 6  | -1.807949000 | 2.979434000  | 2.420528000  |
| 6  | -2.714599000 | 2.176193000  | -2.468103000 |
| 8  | 1.761901000  | 0.566514000  | -1.294040000 |
| 6  | 3.033841000  | 0.501210000  | -1.142526000 |
| 6  | 3.838618000  | 0.869452000  | -2.363174000 |
| 6  | 3.682083000  | 0.126147000  | 0.037414000  |
| 1  | 3.555301000  | 0.211919000  | -3.193895000 |
| 1  | -2.056832000 | 2.257272000  | 3.207464000  |
| 1  | -0.927042000 | 3.534368000  | 2.765494000  |
| 1  | 4.916639000  | 0.796002000  | -2.194520000 |
| 1  | -2.642388000 | 3.673839000  | 2.287708000  |
| 1  | 3.588000000  | 1.893018000  | -2.667147000 |
| 1  | 4.767421000  | 0.110461000  | 0.046627000  |
| 1  | -2.971530000 | 3.224354000  | 0.004974000  |
| 1  | 3.517526000  | -1.646168000 | 2.728457000  |
| 1  | -3.460986000 | 2.952989000  | -2.278799000 |
| 1  | 4.857718000  | -0.545372000 | 2.304387000  |
| 1  | -2.039043000 | 2.507889000  | -3.265447000 |
| 1  | 3.476273000  | 0.025874000  | 3.284548000  |
| 1  | -3.217619000 | 1.272095000  | -2.831837000 |
| 8  | -0.261538000 | -1.627198000 | -0.259641000 |
| 6  | -1.378816000 | -2.210795000 | 0.015167000  |
| 6  | -1.630563000 | -3.529547000 | -0.286056000 |
| 8  | -2.269183000 | -1.383840000 | 0.634760000  |
| 6  | -3.534935000 | -1.901495000 | 0.998172000  |
| 1  | -3.441080000 | -2.732918000 | 1.711354000  |
| 1  | -4.074316000 | -1.078197000 | 1.473131000  |
| 1  | -4.098217000 | -2.243661000 | 0.118094000  |
| 1  | -2.593997000 | -3.959501000 | -0.026973000 |
| 6  | -0.629481000 | -4.402108000 | -0.963239000 |
| 1  | -0.373428000 | -5.276074000 | -0.345146000 |
| 1  | -1.017658000 | -4.797630000 | -1.914044000 |
| 1  | 0.289887000  | -3.847950000 | -1.172135000 |

## 2.K Testing of other functionals

### K1. Energy diagram

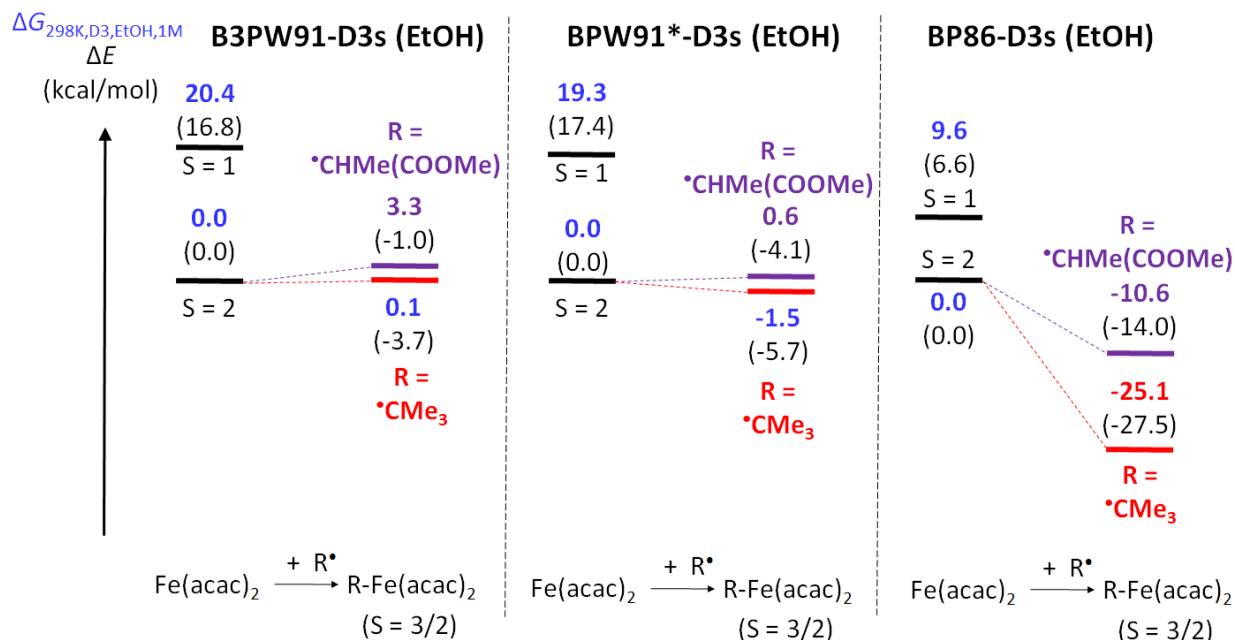

## K2. Discussion

Because the computed energetics of reactions involving a change of oxidation state and spin state such as those in Figure 4 and S.2J.1 are highly functional-dependent, we used this opportunity to test the suitability of the BPW91\* functional versus other popular functionals. Additional exploration of the propionate and *tert*-butyl radical trapping by Fe(acac)<sub>2</sub> was carried out with BP86, a pure functional known to have a bias in favor of lower spin states, and with B3PW91, a classical hybrid functional known to have a bias in favor of the higher spin states. The results in section S.2K.1 are in line with these expected biases and indicate that the observed cross-coupling selectivity, which implies PRE for the *tert*-butyl radical but not for the acrylate radical, is consistent only with the results obtained using the BPW91\* functional.

## K3. Cartesian coordinates and energies (gas-phase E and D3-corrected G in EtOH at 298 K, in hartrees) of the optimized geometries.

### BP86 calculations

Fe(acac)<sub>2</sub> S = 2 BP86

E = -814.031250293

G<sub>298K,D3,EtOH,1M</sub> = -813.909734

<S<sup>2</sup>> = 6.036

|    |              |              |              |   |              |              |              |
|----|--------------|--------------|--------------|---|--------------|--------------|--------------|
| 6  | 3.434305000  | 1.840473000  | 1.745399000  | 8 | -1.338700000 | -1.089579000 | 0.905232000  |
| 6  | 2.623565000  | 0.869892000  | 0.902842000  | 6 | -2.623645000 | -0.902615000 | 0.870027000  |
| 6  | 3.276990000  | 0.000058000  | 0.000168000  | 6 | -3.434465000 | -1.745583000 | 1.840123000  |
| 6  | 2.623823000  | -0.869970000 | -0.902488000 | 6 | -3.276990000 | 0.000059000  | 0.000135000  |
| 6  | 3.434807000  | -1.840091000 | -1.745282000 | 1 | 3.196225000  | 1.693765000  | 2.817142000  |
| 8  | 1.338610000  | 0.905348000  | 1.089441000  | 1 | 4.518664000  | 1.723026000  | 1.598268000  |
| 26 | 0.000000000  | -0.000079000 | -0.000201000 | 1 | 3.148229000  | 2.875352000  | 1.491133000  |
| 8  | -1.338802000 | 1.089484000  | -0.905372000 | 1 | 4.369723000  | 0.000242000  | 0.000138000  |
| 6  | -2.623742000 | 0.902838000  | -0.869712000 | 1 | 3.149001000  | -2.875077000 | -1.491247000 |
| 6  | -3.434647000 | 1.745384000  | -1.840154000 | 1 | 4.519129000  | -1.722379000 | -1.598122000 |
| 8  | 1.338892000  | -0.905426000 | -1.089451000 | 1 | 3.196687000  | -1.693225000 | -2.816988000 |
|    |              |              |              | 1 | -3.195948000 | -2.817227000 | 1.693452000  |
|    |              |              |              | 1 | -3.148900000 | -1.491304000 | 2.875125000  |
|    |              |              |              | 1 | -4.518812000 | -1.598800000 | 1.722230000  |
|    |              |              |              | 1 | -4.369723000 | -0.000062000 | 0.000070000  |
|    |              |              |              | 1 | -3.196371000 | 2.817118000  | -1.693663000 |
|    |              |              |              | 1 | -4.518981000 | 1.598390000  | -1.722369000 |

1 -3.148923000 1.490949000 -2.875092000

**Fe(acac)<sub>2</sub> S = 1 BP86**

**E = -814.020818532**

**G<sub>298K,D3,EtOH,1M</sub> = -813.894431**

**<S<sup>2</sup>> = 2.020**

|    |              |              |              |
|----|--------------|--------------|--------------|
| 6  | -3.399006000 | 2.414494000  | -0.668879000 |
| 6  | -2.583979000 | 1.186887000  | -0.314194000 |
| 6  | -3.217686000 | -0.028733000 | 0.008103000  |
| 6  | -2.523131000 | -1.208782000 | 0.358201000  |
| 6  | -3.298804000 | -2.479062000 | 0.651084000  |
| 8  | -1.299235000 | 1.359991000  | -0.361552000 |
| 26 | -0.000035000 | 0.053094000  | -0.000002000 |
| 8  | 1.299259000  | 1.359955000  | 0.361460000  |
| 6  | 2.584005000  | 1.186877000  | 0.314181000  |
| 6  | 3.398991000  | 2.414487000  | 0.668935000  |
| 8  | -1.237549000 | -1.324960000 | 0.454611000  |
| 8  | 1.237579000  | -1.324921000 | -0.454531000 |
| 6  | 2.523162000  | -1.208764000 | -0.358199000 |
| 6  | 3.298796000  | -2.479052000 | -0.651121000 |
| 6  | 3.217742000  | -0.028730000 | -0.008102000 |
| 1  | -3.107187000 | 2.774549000  | -1.669360000 |
| 1  | -4.481159000 | 2.217772000  | -0.655191000 |
| 1  | -3.172815000 | 3.231184000  | 0.040805000  |
| 1  | -4.310581000 | -0.064303000 | -0.028189000 |
| 1  | -3.017031000 | -3.253082000 | -0.082897000 |
| 1  | -4.388365000 | -2.325022000 | 0.614524000  |
| 1  | -3.016645000 | -2.860437000 | 1.648217000  |
| 1  | 3.016994000  | -3.253097000 | 0.082819000  |
| 1  | 3.016638000  | -2.860369000 | -1.648277000 |
| 1  | 4.388363000  | -2.325041000 | -0.614555000 |
| 1  | 4.310637000  | -0.064301000 | 0.028201000  |
| 1  | 3.172789000  | 3.231208000  | -0.040707000 |
| 1  | 4.481150000  | 2.217791000  | 0.655261000  |
| 1  | 3.107154000  | 2.774477000  | 1.669436000  |

**\*CHMeCOOMe BP86**

**E = -307.052449413**

**G<sub>298K,D3,EtOH,1M</sub> = -306.995549**

**<S<sup>2</sup>> = 0.754**

|   |              |              |              |
|---|--------------|--------------|--------------|
| 6 | -0.074782000 | 0.524804000  | 0.000007000  |
| 6 | 1.377922000  | 0.519694000  | -0.000005000 |
| 8 | -0.771703000 | 1.546224000  | 0.000028000  |
| 8 | -0.609719000 | -0.747806000 | -0.000018000 |
| 6 | -2.051363000 | -0.773272000 | -0.000014000 |
| 1 | -2.452873000 | -0.267377000 | -0.893565000 |
| 1 | -2.328031000 | -1.836621000 | -0.000043000 |
| 1 | -2.452867000 | -0.267427000 | 0.893567000  |
| 1 | 1.830956000  | 1.515884000  | 0.000021000  |
| 6 | 2.243913000  | -0.690943000 | -0.000004000 |
| 1 | 1.651074000  | -1.616093000 | -0.000249000 |
| 1 | 2.914677000  | -0.698573000 | -0.882295000 |

1 2.914298000 -0.698836000 0.882579000

**Fe(acac)<sub>2</sub>(CHMeCOOMe) S = 3/2 BP86**

**E = -1121.10608971**

**G<sub>298K,D3,EtOH,1M</sub> = -1120.922159**

**<S<sup>2</sup>> = 3.857**

|    |              |              |              |
|----|--------------|--------------|--------------|
| 26 | -0.006517000 | -0.254788000 | 0.192904000  |
| 8  | 1.859243000  | -0.048565000 | 0.520056000  |
| 6  | 2.852017000  | -0.827446000 | 0.196413000  |
| 6  | 4.207988000  | -0.279371000 | 0.586942000  |
| 8  | -1.239641000 | 0.168718000  | -1.236019000 |
| 6  | -2.523123000 | 0.036428000  | -1.213094000 |
| 6  | -3.262130000 | -0.461990000 | -0.115895000 |
| 6  | -2.695300000 | -0.935481000 | 1.089523000  |
| 8  | -1.433528000 | -0.925975000 | 1.361232000  |
| 6  | -3.235991000 | 0.455183000  | -2.484833000 |
| 6  | -3.587325000 | -1.518752000 | 2.170186000  |
| 8  | 0.351838000  | -2.063843000 | -0.578425000 |
| 6  | 1.475794000  | -2.640213000 | -0.782673000 |
| 6  | 1.414949000  | -4.013885000 | -1.425818000 |
| 6  | 2.729792000  | -2.069772000 | -0.438671000 |
| 1  | 0.815640000  | -4.689672000 | -0.792211000 |
| 1  | -3.010218000 | 1.513482000  | -2.699172000 |
| 1  | -2.851639000 | -0.135654000 | -3.333737000 |
| 1  | 2.413348000  | -4.451228000 | -1.576614000 |
| 1  | -4.326207000 | 0.322437000  | -2.417562000 |
| 1  | 0.899578000  | -3.942364000 | -2.398655000 |
| 1  | 3.639503000  | -2.633947000 | -0.655147000 |
| 1  | -4.347946000 | -0.519667000 | -0.221863000 |
| 1  | 4.282548000  | -0.233419000 | 1.687601000  |
| 1  | -4.652742000 | -1.487440000 | 1.896919000  |
| 1  | 5.033637000  | -0.893700000 | 0.197734000  |
| 1  | -3.295378000 | -2.565693000 | 2.361347000  |
| 1  | 4.301290000  | 0.755691000  | 0.219556000  |
| 1  | -3.438623000 | -0.965903000 | 3.113317000  |
| 6  | -0.206474000 | 1.608616000  | 1.053917000  |
| 6  | 0.191452000  | 1.512182000  | 2.514816000  |
| 1  | -0.369510000 | 0.710565000  | 3.021496000  |
| 1  | 1.271632000  | 1.318022000  | 2.602695000  |
| 1  | -0.015323000 | 2.462791000  | 3.045058000  |
| 1  | -1.284245000 | 1.752573000  | 0.876105000  |
| 6  | 0.616384000  | 2.564666000  | 0.257516000  |
| 8  | 1.731645000  | 2.982967000  | 0.561459000  |
| 8  | -0.022625000 | 2.944128000  | -0.903292000 |
| 6  | 0.745372000  | 3.843429000  | -1.727442000 |
| 1  | 1.677402000  | 3.364362000  | -2.071556000 |
| 1  | 0.100258000  | 4.083986000  | -2.584290000 |
| 1  | 1.010557000  | 4.758264000  | -1.171925000 |

**\*CMe<sub>3</sub> BP86**

**E = -157.774370206**

**G<sub>298K,D3,EtOH,1M</sub> = -157.696749**

$\langle S^2 \rangle = 0.754$

|   |              |              |              |
|---|--------------|--------------|--------------|
| 6 | 0.000043000  | -0.000031000 | -0.135294000 |
| 6 | 1.238893000  | 0.831586000  | 0.013414000  |
| 6 | 0.100758000  | -1.488614000 | 0.013421000  |
| 6 | -1.339669000 | 0.657043000  | 0.013407000  |
| 1 | -0.759549000 | -2.005379000 | -0.444046000 |
| 1 | 1.022242000  | -1.885200000 | -0.444940000 |
| 1 | 0.122903000  | -1.807541000 | 1.079187000  |
| 1 | 2.116501000  | 0.345314000  | -0.444604000 |
| 1 | 1.504343000  | 1.009680000  | 1.079191000  |
| 1 | 1.121330000  | 1.828045000  | -0.444443000 |
| 1 | -2.143626000 | 0.057285000  | -0.445213000 |
| 1 | -1.627254000 | 0.797384000  | 1.079120000  |
| 1 | -1.357038000 | 1.660512000  | -0.443936000 |

**Fe(acac)<sub>2</sub>(CMe<sub>3</sub>) S = 3/2 BP86**

**E = -971.849395442**

**G<sub>298K,D3,EtOH,1M</sub> = -971.646466**

$\langle S^2 \rangle = 3.898$

|    |              |              |              |
|----|--------------|--------------|--------------|
| 26 | -0.098429000 | 0.302181000  | -0.000157000 |
| 8  | -1.973937000 | 0.787207000  | -0.000388000 |
| 6  | -3.039270000 | 0.036046000  | -0.000295000 |
| 6  | -4.341281000 | 0.813921000  | -0.000121000 |
| 8  | 1.169865000  | -0.104421000 | 1.424508000  |
| 6  | 2.262836000  | -0.773824000 | 1.255638000  |
| 6  | 2.822186000  | -1.104997000 | 0.000470000  |
| 6  | 2.263572000  | -0.773375000 | -1.254907000 |
| 8  | 1.170694000  | -0.103923000 | -1.424188000 |
| 6  | 2.958904000  | -1.206488000 | 2.533293000  |
| 6  | 2.960407000  | -1.205554000 | -2.532308000 |
| 8  | -0.692982000 | -1.669979000 | -0.000773000 |
| 6  | -1.870784000 | -2.156003000 | -0.000696000 |
| 6  | -1.981666000 | -3.672582000 | -0.001020000 |
| 6  | -3.053003000 | -1.362977000 | -0.000394000 |
| 1  | -1.465881000 | -4.078088000 | -0.888063000 |
| 1  | 3.164046000  | -0.324093000 | 3.163187000  |
| 1  | 2.288207000  | -1.865221000 | 3.111658000  |
| 1  | -3.025769000 | -4.020851000 | -0.000665000 |
| 1  | 3.902694000  | -1.737908000 | 2.338509000  |
| 1  | -1.465098000 | -4.078535000 | 0.885358000  |
| 1  | -4.021271000 | -1.868746000 | -0.000334000 |
| 1  | 3.758131000  | -1.668911000 | 0.000644000  |
| 1  | -4.381116000 | 1.469926000  | -0.886795000 |
| 1  | 3.904051000  | -1.737100000 | -2.337158000 |
| 1  | -5.221955000 | 0.154300000  | -0.000063000 |
| 1  | 2.290035000  | -1.864012000 | -3.111361000 |
| 1  | -4.380935000 | 1.469843000  | 0.886623000  |
| 1  | 3.165988000  | -0.322909000 | -3.161709000 |
| 6  | 0.314508000  | 2.343798000  | 0.000315000  |
| 6  | -0.323576000 | 2.877053000  | 1.280416000  |
| 6  | -0.323208000 | 2.877526000  | -1.279775000 |
| 1  | 0.119867000  | 2.404590000  | -2.173931000 |

|   |              |             |              |
|---|--------------|-------------|--------------|
| 1 | -1.411590000 | 2.708059000 | -1.290473000 |
| 1 | -0.148856000 | 3.971760000 | -1.365148000 |
| 1 | -1.411948000 | 2.707499000 | 1.290773000  |
| 1 | -0.149335000 | 3.971273000 | 1.366200000  |
| 1 | 0.119297000  | 2.403850000 | 2.174531000  |
| 6 | 1.830638000  | 2.533799000 | 0.000569000  |
| 1 | 2.300997000  | 2.099302000 | -0.895426000 |
| 1 | 2.058130000  | 3.621392000 | 0.000949000  |
| 1 | 2.300774000  | 2.098724000 | 0.896399000  |

### B3PW91 calculations

**Fe(acac)<sub>2</sub> S = 2 B3PW91**

**E = -813.739506624**

**G<sub>298K,D3,EtOH,1M</sub> = -813.615985**

$\langle S^2 \rangle = 6.018$

|    |              |              |              |
|----|--------------|--------------|--------------|
| 6  | -3.453539000 | -1.744396000 | 1.811426000  |
| 6  | -2.642067000 | -0.883524000 | 0.875137000  |
| 6  | -3.295361000 | -0.000062000 | 0.000071000  |
| 6  | -2.642206000 | 0.883410000  | -0.875083000 |
| 6  | -3.453814000 | 1.744290000  | -1.811240000 |
| 8  | -1.375147000 | -1.042732000 | 0.939775000  |
| 26 | 0.000000000  | 0.000037000  | -0.000099000 |
| 8  | 1.375260000  | -0.939771000 | -1.042758000 |
| 6  | 2.642168000  | -0.875089000 | -0.883450000 |
| 6  | 3.453740000  | -1.811380000 | -1.744229000 |
| 8  | -1.375301000 | 1.042681000  | -0.939856000 |
| 8  | 1.375189000  | 0.939907000  | 1.042607000  |
| 6  | 2.642104000  | 0.875174000  | 0.883442000  |
| 6  | 3.453613000  | 1.811371000  | 1.744373000  |
| 6  | 3.295361000  | 0.000015000  | 0.000046000  |
| 1  | -3.175984000 | -1.514766000 | 2.846351000  |
| 1  | -4.529266000 | -1.601667000 | 1.691609000  |
| 1  | -3.205025000 | -2.796784000 | 1.639780000  |
| 1  | -4.378975000 | -0.000072000 | 0.000145000  |
| 1  | -3.205312000 | 2.796681000  | -1.639586000 |
| 1  | -4.529522000 | 1.601521000  | -1.691298000 |
| 1  | -3.176375000 | 1.514707000  | -2.846203000 |
| 1  | 3.176141000  | 2.846321000  | 1.514766000  |
| 1  | 3.205050000  | 1.639711000  | 2.796746000  |
| 1  | 4.529335000  | 1.691477000  | 1.601676000  |
| 1  | 4.378975000  | -0.000029000 | 0.000129000  |
| 1  | 3.176197000  | -2.846307000 | -1.514594000 |
| 1  | 4.529453000  | -1.691529000 | -1.601412000 |
| 1  | 3.205308000  | -1.639767000 | -2.796644000 |

**Fe(acac)<sub>2</sub> S = 1 B3PW91**

**E = -813.712648955**

**G<sub>298K,D3,EtOH,1M</sub> = -813.583418**

$\langle S^2 \rangle = 2.014$

|   |              |             |              |
|---|--------------|-------------|--------------|
| 6 | -3.363644000 | 2.514393000 | -0.001154000 |
| 6 | -2.574260000 | 1.231378000 | -0.000410000 |

|    |              |              |              |
|----|--------------|--------------|--------------|
| 6  | -3.242477000 | -0.000014000 | 0.000023000  |
| 6  | -2.574231000 | -1.231390000 | 0.000403000  |
| 6  | -3.363584000 | -2.514426000 | 0.001192000  |
| 8  | -1.306674000 | 1.382326000  | -0.000542000 |
| 26 | -0.000015000 | 0.000026000  | -0.000015000 |
| 8  | 1.306688000  | 1.382297000  | 0.000891000  |
| 6  | 2.574270000  | 1.231373000  | 0.000572000  |
| 6  | 3.363638000  | 2.514400000  | 0.001046000  |
| 8  | -1.306640000 | -1.382308000 | 0.000477000  |
| 8  | 1.306654000  | -1.382278000 | -0.000880000 |
| 6  | 2.574242000  | -1.231384000 | -0.000576000 |
| 6  | 3.363578000  | -2.514433000 | -0.001011000 |
| 6  | 3.242503000  | -0.000014000 | -0.000005000 |
| 1  | -3.091508000 | 3.103147000  | -0.883049000 |
| 1  | -4.441926000 | 2.345330000  | 0.002472000  |
| 1  | -3.085930000 | 3.107712000  | 0.875864000  |
| 1  | -4.325834000 | -0.000029000 | 0.000057000  |
| 1  | -3.085909000 | -3.107734000 | -0.875847000 |
| 1  | -4.441871000 | -2.345391000 | -0.002367000 |
| 1  | -3.091379000 | -3.103178000 | 0.883067000  |
| 1  | 3.088385000  | -3.105884000 | 0.878093000  |
| 1  | 3.088870000  | -3.105037000 | -0.880837000 |
| 1  | 4.441872000  | -2.345403000 | -0.000640000 |
| 1  | 4.325860000  | -0.000029000 | -0.000001000 |
| 1  | 3.088421000  | 3.105907000  | -0.878012000 |
| 1  | 4.441927000  | 2.345343000  | 0.000624000  |
| 1  | 3.088982000  | 3.104962000  | 0.880918000  |

**\*CHMeCOOMe B3PW91**

**E = -306.939152848**

**G<sub>298K,D3,EtOH,1M</sub> = -306.879092**

**<S<sup>2</sup>> = 0.758**

|   |              |              |              |
|---|--------------|--------------|--------------|
| 6 | -0.078324000 | 0.518132000  | -0.000048000 |
| 6 | 1.369945000  | 0.515962000  | -0.000001000 |
| 8 | -0.761227000 | 1.531704000  | 0.000042000  |
| 8 | -0.611803000 | -0.731006000 | -0.000033000 |
| 6 | -2.037475000 | -0.768262000 | 0.000004000  |
| 1 | -2.440227000 | -0.271668000 | -0.887122000 |
| 1 | -2.307433000 | -1.824538000 | 0.000009000  |
| 1 | -2.440183000 | -0.271672000 | 0.887151000  |
| 1 | 1.818181000  | 1.504716000  | 0.000073000  |
| 6 | 2.232597000  | -0.689488000 | 0.000005000  |
| 1 | 1.644205000  | -1.607599000 | -0.000278000 |
| 1 | 2.894833000  | -0.696295000 | -0.876942000 |
| 1 | 2.894404000  | -0.696591000 | 0.877278000  |

**Fe(acac)<sub>2</sub>(CHMeCOOMe) S = 3/2 B3PW91**

**E = -1120.68025649**

**G<sub>298K,D3,EtOH,1M</sub> = -1120.489776**

**<S<sup>2</sup>> = 4.150**

|    |              |             |             |
|----|--------------|-------------|-------------|
| 26 | 0.072906000  | 0.216494000 | 0.180601000 |
| 8  | -1.818381000 | 0.309696000 | 0.494432000 |

|   |              |              |              |
|---|--------------|--------------|--------------|
| 6 | -2.654816000 | 1.253851000  | 0.231740000  |
| 6 | -4.078182000 | 0.932621000  | 0.601673000  |
| 8 | 1.267570000  | -0.368688000 | -1.259614000 |
| 6 | 2.540703000  | -0.382137000 | -1.251158000 |
| 6 | 3.345016000  | -0.021057000 | -0.157004000 |
| 6 | 2.852843000  | 0.444133000  | 1.073189000  |
| 8 | 1.619267000  | 0.564184000  | 1.369954000  |
| 6 | 3.188688000  | -0.824544000 | -2.539565000 |
| 6 | 3.821383000  | 0.849945000  | 2.156818000  |
| 8 | -0.003462000 | 2.114127000  | -0.518597000 |
| 6 | -1.011524000 | 2.858501000  | -0.669406000 |
| 6 | -0.749893000 | 4.229343000  | -1.244790000 |
| 6 | -2.332380000 | 2.484239000  | -0.330327000 |
| 1 | -0.066557000 | 4.771469000  | -0.583223000 |
| 1 | 2.824283000  | -1.822670000 | -2.802048000 |
| 1 | 2.882667000  | -0.149060000 | -3.344995000 |
| 1 | -1.662546000 | 4.814134000  | -1.375436000 |
| 1 | 4.278607000  | -0.840583000 | -2.479495000 |
| 1 | -0.245593000 | 4.123796000  | -2.210348000 |
| 1 | -3.131281000 | 3.196035000  | -0.499470000 |
| 1 | 4.419858000  | -0.081430000 | -0.279911000 |
| 1 | -4.145347000 | 0.793793000  | 1.686008000  |
| 1 | 4.863553000  | 0.706859000  | 1.865066000  |
| 1 | -4.776136000 | 1.714502000  | 0.296608000  |
| 1 | 3.659614000  | 1.903907000  | 2.405407000  |
| 1 | -4.363453000 | -0.019377000 | 0.144333000  |
| 1 | 3.617382000  | 0.271908000  | 3.063750000  |
| 6 | -0.057069000 | -1.745466000 | 1.006659000  |
| 6 | -0.338328000 | -1.594803000 | 2.473080000  |
| 1 | 0.398675000  | -0.942053000 | 2.946222000  |
| 1 | -1.342747000 | -1.194570000 | 2.629702000  |
| 1 | -0.299253000 | -2.574195000 | 2.971433000  |
| 1 | 0.957006000  | -2.040487000 | 0.732088000  |
| 6 | -1.101619000 | -2.461119000 | 0.232885000  |
| 8 | -2.190734000 | -2.784602000 | 0.663725000  |
| 8 | -0.700614000 | -2.733308000 | -1.030688000 |
| 6 | -1.666208000 | -3.411393000 | -1.831747000 |
| 1 | -2.582168000 | -2.820523000 | -1.920859000 |
| 1 | -1.202154000 | -3.542035000 | -2.809621000 |
| 1 | -1.920816000 | -4.382216000 | -1.396808000 |

**\*CMe<sub>3</sub> B3PW91**

**E = -157.754113094**

**G<sub>298K,D3,EtOH,1M</sub> = -157.673402**

**<S<sup>2</sup>> = 0.755**

|   |              |              |              |
|---|--------------|--------------|--------------|
| 6 | -0.000051000 | 0.000120000  | -0.144657000 |
| 6 | -1.480485000 | -0.116005000 | 0.014973000  |
| 6 | 0.639796000  | 1.340088000  | 0.014713000  |
| 6 | 0.840683000  | -1.224087000 | 0.014693000  |
| 1 | 1.638323000  | 1.369372000  | -0.436883000 |
| 1 | 0.036916000  | 2.135042000  | -0.439780000 |
| 1 | 0.769472000  | 1.615635000  | 1.077079000  |

|   |              |              |              |   |              |              |              |
|---|--------------|--------------|--------------|---|--------------|--------------|--------------|
| 1 | -2.005660000 | 0.733224000  | -0.437627000 | 1 | 3.188587000  | -0.416790000 | 3.133523000  |
| 1 | -1.784066000 | -0.140339000 | 1.077347000  | 1 | 2.298233000  | -1.934200000 | 3.085249000  |
| 1 | -1.866837000 | -1.036324000 | -0.438457000 | 1 | -3.296331000 | -3.872186000 | 0.000081000  |
| 1 | 1.830669000  | -1.098851000 | -0.439338000 | 1 | 3.900919000  | -1.831428000 | 2.314219000  |
| 1 | 1.014181000  | -1.475020000 | 1.076952000  | 1 | -1.753462000 | -4.025126000 | 0.879587000  |
| 1 | 0.367343000  | -2.103431000 | -0.437627000 | 1 | -4.140896000 | -1.681742000 | 0.000135000  |
|   |              |              |              | 1 | 3.731349000  | -1.783932000 | 0.000290000  |
|   |              |              |              | 1 | -4.324227000 | 1.635753000  | -0.880106000 |
|   |              |              |              | 1 | 3.901375000  | -1.831462000 | -2.313596000 |
|   |              |              |              | 1 | -5.225623000 | 0.375922000  | 0.000290000  |
|   |              |              |              | 1 | 2.298855000  | -1.934155000 | -3.084983000 |
|   |              |              |              | 1 | -4.324054000 | 1.635696000  | 0.880590000  |
|   |              |              |              | 1 | 3.189281000  | -0.416779000 | -3.133027000 |
|   |              |              |              | 6 | 0.446534000  | 2.446268000  | -0.000059000 |
|   |              |              |              | 6 | -0.198859000 | 2.915147000  | 1.280042000  |
|   |              |              |              | 6 | -0.199116000 | 2.915294000  | -1.279977000 |
|   |              |              |              | 1 | 0.235316000  | 2.414656000  | -2.151764000 |
|   |              |              |              | 1 | -1.278362000 | 2.746495000  | -1.272056000 |
|   |              |              |              | 1 | -0.026794000 | 3.997549000  | -1.405947000 |
|   |              |              |              | 1 | -1.278098000 | 2.746288000  | 1.272344000  |
|   |              |              |              | 1 | -0.026573000 | 3.997402000  | 1.406066000  |
|   |              |              |              | 1 | 0.235790000  | 2.414452000  | 2.151685000  |
|   |              |              |              | 6 | 1.952096000  | 2.524020000  | -0.000206000 |
|   |              |              |              | 1 | 2.383869000  | 2.059667000  | -0.889549000 |
|   |              |              |              | 1 | 2.253619000  | 3.584860000  | -0.000066000 |
|   |              |              |              | 1 | 2.384058000  | 2.059387000  | 0.888899000  |

**Fe(acac)<sub>2</sub>(CMe<sub>3</sub>) S = 3/2 B3PW91**  
**E = -971.499484946**  
**G<sub>298K,D3,EtOH,1M</sub> = -971.289174**  
**<S<sup>2</sup>> = 4.367**

|    |              |              |              |   |              |              |              |
|----|--------------|--------------|--------------|---|--------------|--------------|--------------|
| 26 | -0.103148000 | 0.244204000  | -0.000121000 | 1 | -4.324054000 | 1.635696000  | 0.880590000  |
| 8  | -1.970359000 | 0.834383000  | -0.000053000 | 1 | 3.189281000  | -0.416779000 | -3.133027000 |
| 6  | -3.061900000 | 0.151164000  | 0.000071000  | 6 | 0.446534000  | 2.446268000  | -0.000059000 |
| 6  | -4.319213000 | 0.984376000  | 0.000220000  | 6 | -0.198859000 | 2.915147000  | 1.280042000  |
| 8  | 1.215416000  | -0.160380000 | 1.422017000  | 6 | -0.199116000 | 2.915294000  | -1.279977000 |
| 6  | 2.274927000  | -0.847786000 | 1.247574000  | 1 | 0.235316000  | 2.414656000  | -2.151764000 |
| 6  | 2.818998000  | -1.199019000 | 0.000198000  | 1 | -1.278362000 | 2.746495000  | -1.272056000 |
| 6  | 2.275191000  | -0.847772000 | -1.247289000 | 1 | -0.026794000 | 3.997549000  | -1.405947000 |
| 8  | 1.215709000  | -0.160375000 | -1.421958000 | 1 | -1.278098000 | 2.746288000  | 1.272344000  |
| 6  | 2.972948000  | -1.290841000 | 2.510742000  | 1 | -0.026573000 | 3.997402000  | 1.406066000  |
| 6  | 2.973468000  | -1.290835000 | -2.510312000 | 1 | 0.235790000  | 2.414452000  | 2.151685000  |
| 8  | -0.832983000 | -1.697667000 | -0.000275000 | 6 | 1.952096000  | 2.524020000  | -0.000206000 |
| 6  | -2.026920000 | -2.096248000 | -0.000134000 | 1 | 2.383869000  | 2.059667000  | -0.889549000 |
| 6  | -2.240624000 | -3.592830000 | -0.000247000 | 1 | 2.253619000  | 3.584860000  | -0.000066000 |
| 6  | -3.153056000 | -1.236340000 | 0.000043000  | 1 | 2.384058000  | 2.059387000  | 0.888899000  |
| 1  | -1.754093000 | -4.024902000 | -0.880545000 |   |              |              |              |

## 2.L Redox properties and electron transfer from Fe(acac)<sub>2</sub> to the acrylate radical

### L1. Cartesian coordinates, energies (E and D3-corrected G in EtOH at 298 K, in hartrees) and views of the optimized geometries.

**trans-[Fe(acac)<sub>2</sub>(EtOH)<sub>2</sub>]<sup>+</sup>**

**E = -1122.86569436**

**G<sub>298K,D3,EtOH,1M</sub> = -1122.683182**

**<S<sup>2</sup>> = 8.757**

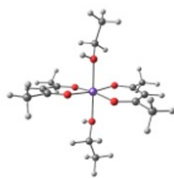

|   |              |              |              |   |              |              |              |
|---|--------------|--------------|--------------|---|--------------|--------------|--------------|
| 6 | 3.505223000  | -0.752674000 | -2.401892000 | 6 | 3.505223000  | -0.752674000 | -2.401892000 |
| 1 | 4.583854000  | -0.679890000 | -2.244743000 | 1 | 4.583854000  | -0.679890000 | -2.244743000 |
| 1 | 3.250239000  | -1.782111000 | -2.682761000 | 1 | 3.250239000  | -1.782111000 | -2.682761000 |
| 1 | 3.216427000  | -0.118115000 | -3.248433000 | 1 | 3.216427000  | -0.118115000 | -3.248433000 |
| 6 | 3.503862000  | 0.758858000  | 2.402013000  | 6 | 3.503862000  | 0.758858000  | 2.402013000  |
| 1 | 4.582425000  | 0.678728000  | 2.247970000  | 1 | 4.582425000  | 0.678728000  | 2.247970000  |
| 1 | 3.254792000  | 1.791441000  | 2.676730000  | 1 | 3.254792000  | 1.791441000  | 2.676730000  |
| 1 | 3.208777000  | 0.130720000  | 3.251121000  | 1 | 3.208777000  | 0.130720000  | 3.251121000  |
| 6 | -3.443186000 | -1.116023000 | -2.259996000 | 6 | -3.443186000 | -1.116023000 | -2.259996000 |
| 1 | -4.522454000 | -1.032952000 | -2.112951000 | 1 | -4.522454000 | -1.032952000 | -2.112951000 |
| 1 | -3.160293000 | -0.581352000 | -3.175138000 | 1 | -3.160293000 | -0.581352000 | -3.175138000 |
| 1 | -3.177786000 | -2.168773000 | -2.415327000 | 1 | -3.177786000 | -2.168773000 | -2.415327000 |
| 6 | -3.446674000 | 1.105166000  | 2.260900000  | 6 | -3.446674000 | 1.105166000  | 2.260900000  |
| 1 | -4.525686000 | 1.019661000  | 2.113373000  | 1 | -4.525686000 | 1.019661000  | 2.113373000  |
| 1 | -3.162895000 | 0.570219000  | 3.175616000  | 1 | -3.162895000 | 0.570219000  | 3.175616000  |
| 1 | -3.183772000 | 2.158358000  | 2.417410000  | 1 | -3.183772000 | 2.158358000  | 2.417410000  |
| 6 | -0.360909000 | 4.375331000  | -0.992601000 | 6 | -0.360909000 | 4.375331000  | -0.992601000 |
| 1 | -0.352443000 | 5.298332000  | -0.401325000 | 1 | -0.352443000 | 5.298332000  | -0.401325000 |



|   |              |              |              |
|---|--------------|--------------|--------------|
| 1 | 0.318770000  | 4.523758000  | -1.841147000 |
| 1 | -1.374134000 | 4.222979000  | -1.378804000 |
| 6 | 0.072708000  | 3.212267000  | -0.126589000 |
| 1 | -0.604551000 | 3.053142000  | 0.716246000  |
| 1 | 1.085453000  | 3.354935000  | 0.272986000  |
| 8 | 0.027897000  | 1.965228000  | -0.866982000 |
| 1 | 0.638391000  | 2.003848000  | -1.618385000 |
| 8 | 0.037785000  | -1.963789000 | 0.865688000  |
| 1 | 0.648471000  | -2.001353000 | 1.616951000  |
| 6 | 0.083363000  | -3.211177000 | 0.126018000  |
| 1 | -0.595045000 | -3.053410000 | -0.716144000 |
| 1 | 1.095867000  | -3.352745000 | -0.274566000 |
| 6 | -0.347721000 | -4.374356000 | 0.993142000  |
| 1 | -0.338334000 | -5.297716000 | 0.402445000  |
| 1 | 0.332949000  | -4.521224000 | 1.841173000  |
| 1 | -1.360830000 | -4.223332000 | 1.380164000  |

*cis*-[Fe(acac)<sub>2</sub>(EtOH)<sub>2</sub>]<sup>+</sup>

**E = -1122.86938432**

**G<sub>298K,D3,EtOH,1M</sub> = -1122.682342**

**<S<sup>2</sup>> = 8.758**

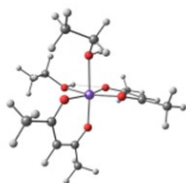

|    |              |              |              |
|----|--------------|--------------|--------------|
| 26 | 0.077827000  | -0.093094000 | 0.030212000  |
| 8  | 1.419586000  | 0.223436000  | -1.346087000 |
| 8  | 1.582710000  | -0.672722000 | 1.236281000  |
| 6  | 2.683627000  | 0.425424000  | -1.219401000 |
| 6  | 3.394703000  | 0.190632000  | -0.033228000 |
| 1  | 4.459178000  | 0.399719000  | -0.030100000 |
| 6  | 2.826750000  | -0.354711000 | 1.127708000  |
| 8  | -1.582110000 | 0.234211000  | -0.940499000 |
| 8  | 0.039522000  | 1.751605000  | 0.646166000  |
| 6  | -2.302208000 | 1.301230000  | -0.999883000 |
| 6  | -1.994857000 | 2.487491000  | -0.321410000 |
| 1  | -2.672931000 | 3.327436000  | -0.428878000 |
| 6  | -0.847695000 | 2.662737000  | 0.468769000  |
| 6  | 3.676435000  | -0.619770000 | 2.335927000  |
| 1  | 4.732348000  | -0.399231000 | 2.163708000  |
| 1  | 3.314981000  | -0.004717000 | 3.169976000  |
| 1  | 3.569420000  | -1.667423000 | 2.641838000  |
| 6  | 3.384460000  | 0.927740000  | -2.447013000 |
| 1  | 4.462436000  | 1.026823000  | -2.301006000 |
| 1  | 3.190311000  | 0.247941000  | -3.285124000 |
| 1  | 2.966705000  | 1.903041000  | -2.726283000 |
| 6  | -0.582698000 | 3.968944000  | 1.156553000  |
| 1  | -1.366909000 | 4.706155000  | 0.970199000  |
| 1  | -0.493531000 | 3.798110000  | 2.236279000  |
| 1  | 0.380376000  | 4.369050000  | 0.816941000  |
| 6  | -3.524268000 | 1.213800000  | -1.865883000 |
| 1  | -4.109276000 | 2.136267000  | -1.857680000 |
| 1  | -3.221000000 | 0.990367000  | -2.896345000 |
| 1  | -4.155670000 | 0.381815000  | -1.531189000 |
| 6  | -1.616828000 | -2.901046000 | -2.299904000 |

|   |              |              |              |
|---|--------------|--------------|--------------|
| 1 | -1.742365000 | -3.158081000 | -3.358036000 |
| 1 | -1.937804000 | -3.758351000 | -1.698640000 |
| 1 | -2.258925000 | -2.044116000 | -2.075632000 |
| 6 | -0.170315000 | -2.558078000 | -2.033547000 |
| 1 | 0.170950000  | -1.717444000 | -2.649313000 |
| 1 | 0.483600000  | -3.416953000 | -2.225696000 |
| 8 | -0.011746000 | -2.181770000 | -0.630552000 |
| 1 | 0.825563000  | -2.538098000 | -0.300634000 |
| 8 | -0.954289000 | -0.807083000 | 1.759634000  |
| 1 | -0.256391000 | -1.099059000 | 2.369136000  |
| 6 | -2.085560000 | -1.709360000 | 1.810506000  |
| 1 | -2.780599000 | -1.322365000 | 1.060592000  |
| 1 | -1.761494000 | -2.706457000 | 1.486409000  |
| 6 | -2.702938000 | -1.731446000 | 3.192456000  |
| 1 | -3.578159000 | -2.391387000 | 3.195725000  |
| 1 | -1.999935000 | -2.115352000 | 3.942350000  |
| 1 | -3.025432000 | -0.730163000 | 3.496468000  |

**Cp<sub>2</sub>Fe**

**E = -510.14907138**

**G<sub>298K,D3,EtOH,1M</sub> = -510.050152**

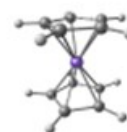

(restricted closed-shell system, S = 0)

|    |              |              |              |
|----|--------------|--------------|--------------|
| 26 | 0.000057000  | 0.000057000  | -0.000418000 |
| 6  | -1.639964000 | -1.052171000 | 0.608511000  |
| 1  | -1.608375000 | -1.990043000 | 1.150794000  |
| 6  | 1.640069000  | 1.208932000  | 0.126606000  |
| 1  | 1.608957000  | 2.286488000  | 0.239171000  |
| 6  | -1.640046000 | 1.208936000  | 0.126349000  |
| 1  | -1.609195000 | 2.286522000  | 0.238720000  |
| 6  | 1.639522000  | 0.253332000  | 1.188951000  |
| 1  | 1.607505000  | 0.478811000  | 2.248504000  |
| 6  | -1.640753000 | 0.493544000  | -1.110585000 |
| 1  | -1.610036000 | 0.933535000  | -2.100588000 |
| 6  | 1.639756000  | -1.052296000 | 0.608426000  |
| 1  | 1.608422000  | -1.990258000 | 1.150523000  |
| 6  | 1.640771000  | 0.493732000  | -1.110435000 |
| 6  | -1.639745000 | 0.253502000  | 1.188831000  |
| 1  | -1.607667000 | 0.479170000  | 2.248369000  |
| 6  | -1.640588000 | -0.903857000 | -0.812523000 |
| 1  | -1.609793000 | -1.709566000 | -1.536664000 |
| 1  | 1.610463000  | 0.933813000  | -2.100435000 |
| 6  | 1.640737000  | -0.903744000 | -0.812575000 |
| 1  | 1.609683000  | -1.709409000 | -1.536858000 |

**[Cp<sub>2</sub>Fe]<sup>+</sup>**

**E = -509.888421561**

**G<sub>298K,D3,EtOH,1M</sub> = -509.862895**

**<S<sup>2</sup>> = 0.774**

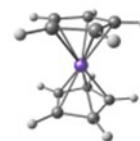

|    |              |              |              |
|----|--------------|--------------|--------------|
| 26 | -0.000004000 | -0.000448000 | -0.000310000 |
| 6  | 1.675254000  | 1.041882000  | -0.628716000 |
| 1  | 1.643432000  | 1.969684000  | -1.188636000 |

|   |              |              |              |
|---|--------------|--------------|--------------|
| 6 | -1.675367000 | -0.472791000 | 1.121029000  |
| 1 | -1.643274000 | -0.894075000 | 2.119477000  |
| 6 | 1.675369000  | -0.472949000 | 1.120964000  |
| 1 | 1.643277000  | -0.894381000 | 2.119348000  |
| 6 | -1.675087000 | 0.920230000  | 0.796287000  |
| 1 | -1.642901000 | 1.739622000  | 1.505434000  |
| 6 | 1.676007000  | -1.212142000 | -0.103385000 |
| 1 | 1.644911000  | -2.291845000 | -0.195562000 |
| 6 | -1.675256000 | 1.041787000  | -0.628868000 |
| 1 | -1.643435000 | 1.969509000  | -1.188923000 |
| 6 | -1.675996000 | -1.212162000 | -0.103214000 |
| 6 | 1.675080000  | 0.920118000  | 0.796422000  |
| 1 | 1.642890000  | 1.739410000  | 1.505685000  |
| 6 | 1.675606000  | -0.276023000 | -1.184730000 |
| 1 | 1.644423000  | -0.522284000 | -2.240093000 |
| 1 | -1.644893000 | -2.291879000 | -0.195234000 |
| 6 | -1.675597000 | -0.276199000 | -1.184693000 |
| 1 | -1.644404000 | -0.522613000 | -2.240021000 |

**[MeCH(COOMe)]<sup>-</sup>**

**E = -306.77699757**

**G<sub>298K,D3,EtOH,1M</sub> = -306.807310**

(restricted closed-shell system, S = 0)

|   |              |              |              |
|---|--------------|--------------|--------------|
| 6 | -0.026576000 | 0.561643000  | -0.006027000 |
| 6 | 1.355695000  | 0.555186000  | 0.012509000  |
| 8 | -0.843238000 | 1.512241000  | -0.005856000 |
| 8 | -0.592007000 | -0.778969000 | -0.033282000 |
| 6 | -1.989206000 | -0.782492000 | 0.017445000  |
| 1 | -2.445030000 | -0.049965000 | -0.713189000 |
| 1 | -2.303968000 | -1.835949000 | -0.229176000 |
| 1 | -2.398884000 | -0.511883000 | 1.044990000  |
| 1 | 1.825554000  | 1.538702000  | 0.022372000  |
| 6 | 2.226220000  | -0.660414000 | 0.005099000  |
| 1 | 1.605469000  | -1.565100000 | 0.042169000  |
| 1 | 2.873407000  | -0.761668000 | -0.895053000 |
| 1 | 2.928605000  | -0.723846000 | 0.866828000  |

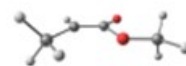

## L2. Calculations of Redox Potential

**[Fe<sup>II</sup>(acac)<sub>2</sub>(EtOH)<sub>2</sub>]/[Fe<sup>III</sup>(acac)<sub>2</sub>(EtOH)<sub>2</sub>]<sup>+</sup> redox potential:**

[Fe<sup>II</sup>(acac)<sub>2</sub>(EtOH)<sub>2</sub>] + Cp<sub>2</sub>Fe<sup>+</sup>

E = -1632.976772

G<sub>298K,D3,EtOH,1M</sub> = -1632.717983

[Fe<sup>III</sup>(acac)<sub>2</sub>(EtOH)<sub>2</sub>]<sup>+</sup> + Cp<sub>2</sub>Fe

E = -1633.014766

G<sub>298K,D3,EtOH,1M</sub> = -1632.733333

[Fe<sup>III</sup>(acac)<sub>2</sub>(EtOH)<sub>2</sub>]<sup>+</sup> + Cp<sub>2</sub>Fe → [Fe<sup>II</sup>(acac)<sub>2</sub>(EtOH)<sub>2</sub>] + Cp<sub>2</sub>Fe<sup>+</sup>

ΔE = 23.84 kcal/mol

ΔG<sub>298K,D3,EtOH,1M</sub> = 9.63 kcal/mol = 40294 J/mol

→ ΔE<sub>1/2</sub> ([Fe<sup>II</sup>(acac)<sub>2</sub>(EtOH)<sub>2</sub>]/[Fe<sup>III</sup>(acac)<sub>2</sub>(EtOH)<sub>2</sub>]<sup>+</sup>) = -0.418 V vs. Cp<sub>2</sub>Fe/Cp<sub>2</sub>Fe<sup>+</sup>

[Fe<sup>II</sup>(acac)<sub>2</sub>(EtOH)<sub>2</sub>] + <sup>•</sup>CHMe(COOMe)

E = -1429.838899

G<sub>298K,D3,EtOH,1M</sub> = -1429.546266

[Fe<sup>III</sup>(acac)<sub>2</sub>(EtOH)<sub>2</sub>]<sup>+</sup> + <sup>•</sup>CHMe(COOMe)

E = -1429.642692

G<sub>298K,D3,EtOH,1M</sub> = -1429.490492

[Fe<sup>III</sup>(acac)<sub>2</sub>(EtOH)<sub>2</sub>]<sup>+</sup> + <sup>•</sup>CHMe(COOMe) → [Fe<sup>II</sup>(acac)<sub>2</sub>(EtOH)<sub>2</sub>]<sup>+</sup> + <sup>•</sup>CHMe(COOMe)

ΔE = 123.12 kcal/mol

ΔG<sub>298K,D3,EtOH,1M</sub> = 35.00 kcal/mol

## 2.M Concerted proton-electron transfers to the acrylate and *t*Bu radicals

### M1. Energy diagram and views of the optimized geometries

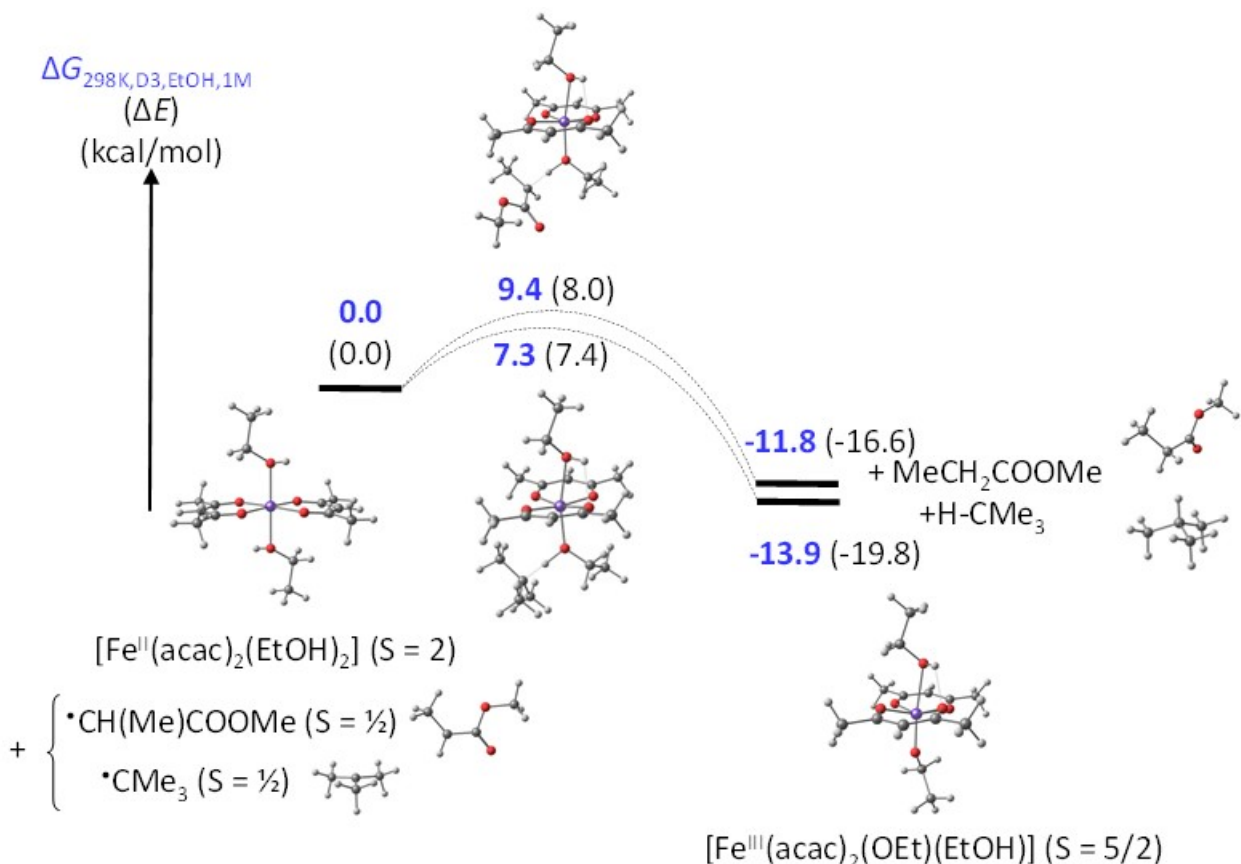

### J2. Cartesian coordinates and energies (gas-phase E and D3-corrected G in EtOH at 298 K, in hartrees) of the optimized geometries.

|                                                   |              |              |              |   |              |              |              |
|---------------------------------------------------|--------------|--------------|--------------|---|--------------|--------------|--------------|
| $[Fe(acac)_2(EtOH)(EtO-H \cdots CH(Me)COOMe)]$ TS |              |              |              | 6 | -2.237446000 | 2.565575000  | -1.757215000 |
| E = -1429.82619829                                |              |              |              | 1 | -2.802303000 | 3.457179000  | -1.469063000 |
| $G_{298K,D3,EtOH,1M} = -1429.531329$              |              |              |              | 1 | -1.709758000 | 2.750275000  | -2.699437000 |
| $\langle S^2 \rangle = 8.772$                     |              |              |              | 1 | -2.939587000 | 1.739483000  | -1.930579000 |
| 26                                                | 0.782415000  | 0.098048000  | 0.093449000  | 6 | -0.603884000 | 3.095902000  | 2.964155000  |
| 8                                                 | 0.484068000  | 1.513463000  | 1.586224000  | 1 | -1.369670000 | 3.876440000  | 2.940233000  |
| 8                                                 | -0.405921000 | 1.250009000  | -1.063226000 | 1 | -0.862402000 | 2.366058000  | 3.741468000  |
| 6                                                 | -0.454514000 | 2.380081000  | 1.641813000  | 1 | 0.356911000  | 3.538605000  | 3.253149000  |
| 6                                                 | -1.320686000 | 2.701682000  | 0.585110000  | 6 | 2.746758000  | -2.356983000 | -2.855363000 |
| 1                                                 | -2.078906000 | 3.458426000  | 0.763100000  | 1 | 3.633181000  | -2.997701000 | -2.857571000 |
| 6                                                 | -1.252065000 | 2.131728000  | -0.700887000 | 1 | 1.880007000  | -2.942832000 | -3.185275000 |
| 8                                                 | 2.138774000  | -0.851326000 | 1.266289000  | 1 | 2.881131000  | -1.549937000 | -3.585665000 |
| 8                                                 | 1.449500000  | -0.981089000 | -1.443721000 | 6 | 4.042152000  | -2.042534000 | 1.991529000  |
| 6                                                 | 3.085337000  | -1.618638000 | 0.901460000  | 1 | 4.818517000  | -2.724754000 | 1.633459000  |
| 6                                                 | 3.283923000  | -2.089220000 | -0.410939000 | 1 | 4.516386000  | -1.150918000 | 2.419672000  |
| 1                                                 | 4.121062000  | -2.756844000 | -0.590725000 | 1 | 3.482224000  | -2.525426000 | 2.801362000  |
| 6                                                 | 2.459598000  | -1.762083000 | -1.497361000 | 6 | -0.545063000 | -2.806699000 | 2.400872000  |

|   |              |              |              |
|---|--------------|--------------|--------------|
| 1 | -0.789671000 | -3.062645000 | 3.439856000  |
| 1 | -1.004302000 | -3.561415000 | 1.751864000  |
| 1 | 0.541342000  | -2.850298000 | 2.276060000  |
| 6 | -1.057829000 | -1.415668000 | 2.072839000  |
| 1 | -0.595440000 | -0.665806000 | 2.726291000  |
| 1 | -2.147783000 | -1.361283000 | 2.198625000  |
| 8 | -0.743093000 | -1.025030000 | 0.732133000  |
| 1 | -1.558333000 | -1.420488000 | 0.047836000  |
| 8 | 2.531596000  | 1.556284000  | -0.198700000 |
| 1 | 2.308199000  | 2.071663000  | 0.594211000  |
| 6 | 2.585190000  | 2.425983000  | -1.335706000 |
| 1 | 2.672540000  | 1.759112000  | -2.199496000 |
| 1 | 1.636841000  | 2.971253000  | -1.439961000 |
| 6 | 3.766140000  | 3.377048000  | -1.257758000 |
| 1 | 3.818699000  | 3.995854000  | -2.162105000 |
| 1 | 3.678498000  | 4.053480000  | -0.397359000 |
| 1 | 4.706044000  | 2.822059000  | -1.162375000 |
| 6 | -3.805609000 | -1.357459000 | -0.237216000 |
| 8 | -4.238546000 | -0.316157000 | -1.007134000 |
| 6 | -2.609442000 | -2.008396000 | -0.770995000 |
| 1 | -2.525856000 | -3.030700000 | -0.393716000 |
| 8 | -4.367040000 | -1.659689000 | 0.808679000  |
| 6 | -2.151147000 | -1.776265000 | -2.183622000 |
| 1 | -1.159414000 | -2.213091000 | -2.344718000 |
| 1 | -2.840357000 | -2.230907000 | -2.914051000 |
| 1 | -2.083556000 | -0.708992000 | -2.415055000 |
| 6 | -5.382425000 | 0.361564000  | -0.487237000 |
| 1 | -5.630316000 | 1.135065000  | -1.218405000 |
| 1 | -6.223538000 | -0.329142000 | -0.363060000 |
| 1 | -5.161821000 | 0.813545000  | 0.486525000  |

**[Fe(acac)<sub>2</sub>(EtOH)(EtO-H...CMe<sub>3</sub>)] TS**

**E = -1280.70939472**

**G<sub>298K,D3,EtOH,1M</sub> = -1280.396322**

**<S<sup>2</sup>> = 8.774**

|    |              |              |              |
|----|--------------|--------------|--------------|
| 26 | 0.343580000  | -0.081805000 | 0.054023000  |
| 8  | 0.852052000  | 1.374735000  | 1.468302000  |
| 8  | -0.112456000 | 1.481798000  | -1.181224000 |
| 6  | 0.693787000  | 2.638565000  | 1.398134000  |
| 6  | 0.206857000  | 3.335326000  | 0.278280000  |
| 1  | 0.122291000  | 4.415694000  | 0.351385000  |
| 6  | -0.164068000 | 2.728683000  | -0.938171000 |
| 8  | 1.116207000  | -1.529842000 | 1.275946000  |
| 8  | 0.279345000  | -1.445640000 | -1.409677000 |
| 6  | 1.527881000  | -2.685256000 | 0.940893000  |
| 6  | 1.389177000  | -3.258000000 | -0.337837000 |
| 1  | 1.778397000  | -4.260392000 | -0.490169000 |
| 6  | 0.778560000  | -2.618954000 | -1.428729000 |
| 6  | -0.659632000 | 3.599638000  | -2.071584000 |
| 1  | -0.627886000 | 4.667023000  | -1.833966000 |
| 1  | -0.056424000 | 3.408699000  | -2.967125000 |
| 1  | -1.691363000 | 3.320622000  | -2.319681000 |

|   |              |              |              |
|---|--------------|--------------|--------------|
| 6 | 1.073427000  | 3.417048000  | 2.638877000  |
| 1 | 0.974847000  | 4.498901000  | 2.510085000  |
| 1 | 0.437697000  | 3.098040000  | 3.474242000  |
| 1 | 2.106464000  | 3.179203000  | 2.920381000  |
| 6 | 0.681235000  | -3.344929000 | -2.751523000 |
| 1 | 1.135958000  | -4.339564000 | -2.724451000 |
| 1 | -0.373340000 | -3.440899000 | -3.037942000 |
| 1 | 1.169142000  | -2.746109000 | -3.530182000 |
| 6 | 2.209066000  | -3.481934000 | 2.032143000  |
| 1 | 2.557467000  | -4.460634000 | 1.689163000  |
| 1 | 3.062480000  | -2.910824000 | 2.417361000  |
| 1 | 1.515072000  | -3.622503000 | 2.869991000  |
| 6 | -2.028044000 | -1.574649000 | 2.832815000  |
| 1 | -2.293903000 | -1.471162000 | 3.893192000  |
| 1 | -2.802853000 | -2.174871000 | 2.341500000  |
| 1 | -1.075549000 | -2.108754000 | 2.760234000  |
| 6 | -1.895591000 | -0.207367000 | 2.181968000  |
| 1 | -1.117359000 | 0.384591000  | 2.682127000  |
| 1 | -2.838263000 | 0.357352000  | 2.263642000  |
| 8 | -1.527169000 | -0.300976000 | 0.813112000  |
| 1 | -2.518932000 | -0.267575000 | 0.131274000  |
| 8 | 2.636531000  | 0.233240000  | -0.295203000 |
| 1 | 2.724890000  | 0.621879000  | 0.590378000  |
| 6 | 3.164045000  | 1.151039000  | -1.257177000 |
| 1 | 2.871175000  | 0.748121000  | -2.232357000 |
| 1 | 2.685444000  | 2.135120000  | -1.148004000 |
| 6 | 4.675489000  | 1.266970000  | -1.152463000 |
| 1 | 5.065058000  | 1.933277000  | -1.932372000 |
| 1 | 4.976791000  | 1.680525000  | -0.180986000 |
| 1 | 5.148252000  | 0.285133000  | -1.267164000 |
| 6 | -3.620961000 | -0.178032000 | -0.655803000 |
| 6 | -3.000687000 | -0.326788000 | -2.026816000 |
| 1 | -2.528836000 | -1.307647000 | -2.151429000 |
| 1 | -3.771735000 | -0.221013000 | -2.810419000 |
| 1 | -2.229282000 | 0.431717000  | -2.203062000 |
| 6 | -4.183945000 | 1.195925000  | -0.367575000 |
| 1 | -5.042273000 | 1.408640000  | -1.028697000 |
| 1 | -4.546200000 | 1.285338000  | 0.664590000  |
| 1 | -3.437342000 | 1.980371000  | -0.538456000 |
| 6 | -4.512633000 | -1.325346000 | -0.236731000 |
| 1 | -4.859670000 | -1.220262000 | 0.799124000  |
| 1 | -5.412393000 | -1.368667000 | -0.875169000 |
| 1 | -4.000769000 | -2.290578000 | -0.333892000 |

**Fe(acac)<sub>2</sub>(OEt)(EtOH)**

**E = -1122.46004922**

**G<sub>298K,D3,EtOH,1M</sub> = -1122.232209**

**<S<sup>2</sup>> = 8.762**

|    |              |              |              |
|----|--------------|--------------|--------------|
| 26 | 0.018011000  | 0.272699000  | -0.102276000 |
| 8  | -1.437442000 | -0.201698000 | -1.393810000 |
| 8  | -1.415047000 | 0.602419000  | 1.271139000  |
| 6  | -2.685686000 | -0.347493000 | -1.176896000 |

|   |              |              |              |
|---|--------------|--------------|--------------|
| 6 | -3.322498000 | -0.123321000 | 0.053777000  |
| 1 | -4.393233000 | -0.291727000 | 0.113562000  |
| 6 | -2.659375000 | 0.339685000  | 1.203167000  |
| 8 | 1.431570000  | -0.534104000 | -1.312512000 |
| 8 | 1.394120000  | 0.008674000  | 1.404806000  |
| 6 | 2.684860000  | -0.342940000 | -1.185713000 |
| 6 | 3.325067000  | 0.009600000  | 0.017738000  |
| 1 | 4.403616000  | 0.132919000  | 0.006077000  |
| 6 | 2.658530000  | 0.132603000  | 1.245394000  |
| 6 | -3.441801000 | 0.569682000  | 2.473433000  |
| 1 | -4.513112000 | 0.387326000  | 2.350024000  |
| 1 | -3.052165000 | -0.091341000 | 3.257344000  |
| 1 | -3.284065000 | 1.598968000  | 2.816308000  |
| 6 | -3.502625000 | -0.781167000 | -2.370466000 |
| 1 | -4.556913000 | -0.938703000 | -2.125908000 |
| 1 | -3.425818000 | -0.018563000 | -3.155208000 |
| 1 | -3.082141000 | -1.705513000 | -2.783745000 |
| 6 | 3.446286000  | 0.414679000  | 2.500722000  |
| 1 | 4.525819000  | 0.438060000  | 2.327190000  |
| 1 | 3.126293000  | 1.380532000  | 2.910892000  |
| 1 | 3.215093000  | -0.344253000 | 3.257732000  |
| 6 | 3.505494000  | -0.541490000 | -2.436354000 |
| 1 | 4.580426000  | -0.446799000 | -2.258507000 |
| 1 | 3.290396000  | -1.528984000 | -2.861279000 |
| 1 | 3.197377000  | 0.201065000  | -3.182790000 |
| 8 | 0.362205000  | 2.014060000  | -0.516309000 |
| 6 | -0.474516000 | 3.127933000  | -0.605960000 |
| 1 | -0.911839000 | 3.175185000  | -1.620073000 |
| 1 | -1.317651000 | 3.030247000  | 0.100262000  |
| 6 | 0.296759000  | 4.410821000  | -0.320189000 |
| 1 | 1.127952000  | 4.523850000  | -1.025744000 |
| 1 | -0.358446000 | 5.287026000  | -0.410380000 |
| 1 | 0.710260000  | 4.389447000  | 0.694736000  |
| 8 | -0.317033000 | -1.964792000 | 0.716529000  |
| 1 | 0.413282000  | -1.803953000 | 1.338379000  |
| 6 | -0.006852000 | -3.101003000 | -0.092335000 |
| 1 | -0.813457000 | -3.157207000 | -0.830964000 |
| 1 | 0.926396000  | -2.928070000 | -0.646586000 |
| 6 | 0.063629000  | -4.377089000 | 0.729332000  |
| 1 | -0.874248000 | -4.543341000 | 1.271324000  |

|   |             |              |             |
|---|-------------|--------------|-------------|
| 1 | 0.247845000 | -5.242703000 | 0.080829000 |
| 1 | 0.879433000 | -4.333103000 | 1.463065000 |

**MeCH<sub>2</sub>COOMe**

**E = -307.405250263**

**G<sub>298K,D3,EtOH,1M</sub> = -307.332905**

(restricted closed-shell system, S = 0)

|   |              |              |              |
|---|--------------|--------------|--------------|
| 6 | 0.084008000  | 0.505606000  | -0.063031000 |
| 6 | -1.393201000 | 0.426792000  | -0.378033000 |
| 8 | 0.680552000  | 1.508089000  | 0.267631000  |
| 8 | 0.685979000  | -0.695572000 | -0.217784000 |
| 6 | 2.093400000  | -0.700241000 | 0.043155000  |
| 1 | 2.298416000  | -0.381285000 | 1.070431000  |
| 1 | 2.420934000  | -1.730479000 | -0.110644000 |
| 1 | 2.617045000  | -0.025106000 | -0.641986000 |
| 1 | -1.487831000 | 0.334076000  | -1.469762000 |
| 6 | -2.121762000 | -0.733521000 | 0.301913000  |
| 1 | -1.694390000 | -1.695092000 | 0.002030000  |
| 1 | -2.054552000 | -0.658737000 | 1.393446000  |
| 1 | -3.183411000 | -0.728665000 | 0.031156000  |
| 1 | -1.823126000 | 1.393341000  | -0.097468000 |

**Me<sub>3</sub>CH**

**E = -158.292724054**

**G<sub>298K,D3,EtOH,1M</sub> = -158.197875**

(restricted closed-shell system, S = 0)

|   |              |              |              |
|---|--------------|--------------|--------------|
| 1 | -0.000190000 | -0.000183000 | -1.474955000 |
| 6 | -0.000117000 | -0.000150000 | -0.372895000 |
| 6 | 1.086888000  | -0.970273000 | 0.095433000  |
| 1 | 2.077916000  | -0.667113000 | -0.265268000 |
| 1 | 1.130262000  | -1.006689000 | 1.192918000  |
| 1 | 0.896747000  | -1.989896000 | -0.262788000 |
| 6 | -1.383945000 | -0.455831000 | 0.095491000  |
| 1 | -1.438151000 | -0.472723000 | 1.192983000  |
| 1 | -2.171672000 | 0.217862000  | -0.264757000 |
| 1 | -1.616701000 | -1.466367000 | -0.263363000 |
| 6 | 0.297099000  | 1.426169000  | 0.095395000  |
| 1 | -0.461997000 | 2.132801000  | -0.263091000 |
| 1 | 0.309951000  | 1.481321000  | 1.192864000  |
| 1 | 1.274288000  | 1.771492000  | -0.265086000 |

## 2.N Acrylate radical homopropagation

### N1. Energy diagram and views of the optimized geometries

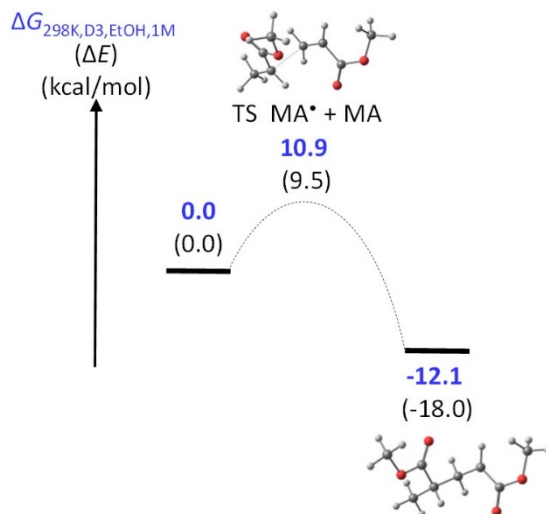

### N2. Cartesian coordinates and energies (gas-phase E and D3-corrected G in EtOH at 298 K, in hartrees) of the optimized geometries.

**MeOOC(Me)C $\cdot$ ·CH<sub>2</sub>=CHCOOMe TS**

**E = -612.904336956**

**G<sub>298K,D3,EtOH,1M</sub> = -612.788627**

**<S<sup>2</sup>> = 0.772**

|   |              |              |              |
|---|--------------|--------------|--------------|
| 6 | 1.562643000  | -0.995790000 | -0.443575000 |
| 6 | 1.998525000  | 0.347144000  | -0.072936000 |
| 6 | 2.447164000  | -2.146176000 | -0.119577000 |
| 1 | 1.887949000  | -3.084747000 | -0.035615000 |
| 1 | 3.186816000  | -2.290537000 | -0.924255000 |
| 1 | 3.007613000  | -1.959313000 | 0.801952000  |
| 6 | -1.136799000 | -0.339142000 | 0.846110000  |
| 1 | -1.158318000 | 0.616835000  | 1.361784000  |
| 6 | -2.082083000 | -0.619692000 | -0.254026000 |
| 8 | -3.159324000 | 0.191269000  | -0.419166000 |
| 8 | -1.931309000 | -1.541786000 | -1.033152000 |
| 6 | -3.438105000 | 1.232026000  | 0.510828000  |
| 1 | -3.497904000 | 0.857004000  | 1.540330000  |
| 1 | -2.694858000 | 2.038459000  | 0.454807000  |
| 1 | -4.413038000 | 1.633081000  | 0.222604000  |
| 6 | -0.172585000 | -1.253930000 | 1.133612000  |
| 1 | -0.248822000 | -2.248584000 | 0.701518000  |
| 1 | 0.508104000  | -1.108910000 | 1.968798000  |
| 1 | 0.825857000  | -1.084742000 | -1.238776000 |
| 8 | 1.257220000  | 1.305315000  | -0.685766000 |
| 8 | 2.905184000  | 0.602613000  | 0.707343000  |
| 6 | 1.631997000  | 2.644505000  | -0.359360000 |
| 1 | 2.672851000  | 2.837854000  | -0.640887000 |
| 1 | 0.958579000  | 3.289354000  | -0.928169000 |
| 1 | 1.526451000  | 2.831287000  | 0.715368000  |

**MeOOC(Me)C-CH<sub>2</sub>CH $\cdot$ (COOMe)**

**E = -612.948121087**

**G<sub>298K,D3,EtOH,1M</sub> = -612.825343**

**<S<sup>2</sup>> = 0.758**

|   |              |              |              |
|---|--------------|--------------|--------------|
| 6 | 1.430587601  | -1.015435131 | -0.323546936 |
| 6 | 1.866469601  | 0.327498869  | 0.047092064  |
| 6 | 2.315108601  | -2.165821131 | 0.000451064  |
| 1 | 1.755893601  | -3.104392131 | 0.084413064  |
| 1 | 3.054760601  | -2.310182131 | -0.804226936 |
| 1 | 2.875557601  | -1.978958131 | 0.921980064  |
| 6 | -1.004743601 | -0.319496869 | 0.726081936  |
| 1 | -1.026262601 | 0.636480131  | 1.241755936  |
| 6 | -1.950027601 | -0.600046869 | -0.374054064 |
| 8 | -3.027268601 | 0.210914131  | -0.539194064 |
| 8 | -1.799253601 | -1.522140869 | -1.153180064 |
| 6 | -3.306049601 | 1.251671131  | 0.390799936  |
| 1 | -3.365848601 | 0.876649131  | 1.420301936  |
| 1 | -2.562802601 | 2.058104131  | 0.334778936  |
| 1 | -4.280982601 | 1.652726131  | 0.102575936  |
| 6 | -0.040529601 | -1.234284869 | 1.013583936  |
| 1 | -0.116766601 | -2.228938869 | 0.581489936  |
| 1 | 0.640159399  | -1.089264869 | 1.848769936  |
| 1 | 0.693801601  | -1.104387131 | -1.118747936 |
| 8 | 1.125164601  | 1.285669869  | -0.565737936 |
| 8 | 2.773128601  | 0.582967869  | 0.827371064  |
| 6 | 1.499941601  | 2.624859869  | -0.239331936 |
| 1 | 2.540795601  | 2.818208869  | -0.520858936 |
| 1 | 0.826523601  | 3.269708869  | -0.808140936 |

1 1.394395601 2.811641869 0.835396064  
**2.O MeOH adducts of (acac)<sub>2</sub>Fe<sup>III</sup>(CHMeCOOMe)**

**O1. Energy diagram and views of the optimized geometries**

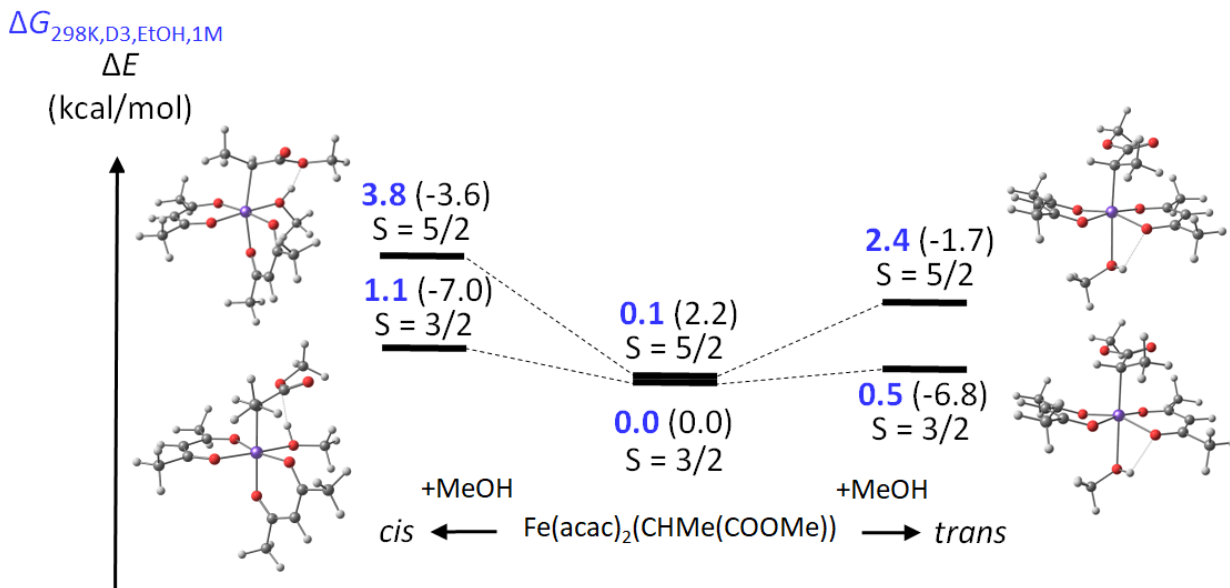

**O2. Cartesian coordinates and energies (gas-phase E and D3-corrected G in EtOH at 298 K, in hartrees) of the optimized geometries.**

|                                                            |              |              |              |              |              |              |              |
|------------------------------------------------------------|--------------|--------------|--------------|--------------|--------------|--------------|--------------|
| <b>MeOH</b>                                                | 6            | -2.824216000 | -0.800835000 | 0.991469000  |              |              |              |
| <b>E = -115.609711214</b>                                  | 6            | -3.336771000 | 0.306413000  | 0.292484000  |              |              |              |
| <b>G<sub>298K,D3,EtOH,1M</sub> = -115.586844s</b>          | 6            | -2.650902000 | 0.959873000  | -0.746949000 |              |              |              |
| (restricted closed-shell system, S = 0)                    | 6            | -3.300996000 | 2.108445000  | -1.472180000 |              |              |              |
| 8                                                          | -0.747348000 | 0.122005000  | -0.000001000 | 8            | -1.480266000 | 0.647378000  | -1.149635000 |
| 1                                                          | -1.129605000 | -0.764244000 | 0.000025000  | 6            | -3.681663000 | -1.494477000 | 2.021390000  |
| 6                                                          | 0.658234000  | -0.019463000 | -0.000003000 | 1            | 3.604333000  | 1.874214000  | -0.995121000 |
| 1                                                          | 1.081083000  | 0.990720000  | -0.000164000 | 1            | 3.336130000  | 1.216591000  | -2.619968000 |
| 1                                                          | 1.038974000  | -0.542720000 | 0.893218000  | 1            | 4.673279000  | 0.580340000  | -1.607575000 |
| 1                                                          | 1.038925000  | -0.543024000 | -0.893054000 | 1            | 4.211064000  | -1.284431000 | -0.225016000 |
|                                                            |              |              |              | 1            | 3.985595000  | -3.297653000 | 0.948873000  |
| <b>trans-Fe(acac)<sub>2</sub>(CHMeCOOMe)(MeOH) S = 3/2</b> | 1            | 2.614468000  | -3.243763000 | 2.092207000  |              |              |              |
| <b>E = -1235.66640182</b>                                  | 1            | 2.469452000  | -4.174827000 | 0.603145000  |              |              |              |
| <b>G<sub>298K,D3,EtOH,1M</sub> = -1235.442055</b>          | 1            | -3.257604000 | 1.930773000  | -2.552783000 |              |              |              |
| <b>&lt;S<sup>2</sup>&gt; = 4.116</b>                       | 1            | -4.338166000 | 2.270899000  | -1.166206000 |              |              |              |
| 26                                                         | -0.117679000 | -0.374128000 | -0.137102000 | 1            | -2.717788000 | 3.015351000  | -1.270874000 |
| 8                                                          | -0.473060000 | -2.157266000 | -1.841289000 | 1            | -4.341006000 | 0.642595000  | 0.531137000  |
| 8                                                          | 1.437190000  | 0.259929000  | -1.180102000 | 1            | -3.184957000 | -1.441745000 | 2.997854000  |
| 6                                                          | 2.671077000  | -0.010359000 | -1.000024000 | 1            | -4.681926000 | -1.060046000 | 2.102277000  |
| 6                                                          | 3.138574000  | -1.127671000 | -0.281025000 | 1            | -3.767313000 | -2.557367000 | 1.765626000  |
| 6                                                          | 2.300954000  | -2.057660000 | 0.343648000  | 1            | -0.124110000 | -2.777026000 | -1.181169000 |
| 8                                                          | 1.020006000  | -1.979708000 | 0.388190000  | 6            | -1.765141000 | -2.574467000 | -2.253393000 |
| 6                                                          | 3.647752000  | 0.960015000  | -1.601799000 | 1            | -2.458467000 | -2.666171000 | -1.405963000 |
| 6                                                          | 2.896052000  | -3.259841000 | 1.032263000  | 1            | -2.144173000 | -1.806311000 | -2.933095000 |
| 8                                                          | -1.658902000 | -1.293211000 | 0.820005000  | 1            | -1.725986000 | -3.531138000 | -2.794878000 |

|   |              |              |              |
|---|--------------|--------------|--------------|
| 6 | 0.14762000   | 1.026633000  | 1.535281000  |
| 1 | -0.912929000 | 1.251104000  | 1.690988000  |
| 6 | 0.823817000  | 0.273831000  | 2.659717000  |
| 1 | 0.785534000  | 0.845436000  | 3.600960000  |
| 1 | 0.344657000  | -0.694852000 | 2.841110000  |
| 1 | 1.881229000  | 0.108019000  | 2.428146000  |
| 6 | 0.886333000  | 2.175706000  | 1.008605000  |
| 8 | 2.096857000  | 2.352946000  | 1.074439000  |
| 8 | 0.061579000  | 3.072432000  | 0.389214000  |
| 6 | 0.732171000  | 4.171399000  | -0.220726000 |
| 1 | 1.386264000  | 4.681797000  | 0.494764000  |
| 1 | 1.339416000  | 3.835444000  | -1.069813000 |
| 1 | -0.052531000 | 4.848072000  | -0.569132000 |

|   |              |              |              |
|---|--------------|--------------|--------------|
| 1 | -1.725986000 | -3.531138000 | -2.794878000 |
| 6 | 0.147620000  | 1.026633000  | 1.535281000  |
| 1 | -0.912929000 | 1.251104000  | 1.690988000  |
| 6 | 0.823817000  | 0.273831000  | 2.659717000  |
| 1 | 0.785534000  | 0.845436000  | 3.600960000  |
| 1 | 0.344657000  | -0.694852000 | 2.841110000  |
| 1 | 1.881229000  | 0.108019000  | 2.428146000  |
| 6 | 0.886333000  | 2.175706000  | 1.008605000  |
| 8 | 2.096857000  | 2.352946000  | 1.074439000  |
| 8 | 0.061579000  | 3.072432000  | 0.389214000  |
| 6 | 0.732171000  | 4.171399000  | -0.220726000 |
| 1 | 1.386264000  | 4.681797000  | 0.494764000  |
| 1 | 1.339416000  | 3.835444000  | -1.069813000 |
| 1 | -0.052531000 | 4.848072000  | -0.569132000 |

***trans*-Fe(acac)<sub>2</sub>(CHMeCOOMe)(MeOH) S = 5/2**

**E = -1235.65820741**

**G<sub>298K,D3,EtOH,1M</sub> = -1235.438996**

**<S<sup>2</sup>> = 8.758**

|    |              |              |              |
|----|--------------|--------------|--------------|
| 26 | -0.117679000 | -0.374128000 | -0.137102000 |
| 8  | -0.473060000 | -2.157266000 | -1.841289000 |
| 8  | 1.437190000  | 0.259929000  | -1.180102000 |
| 6  | 2.671077000  | -0.010359000 | -1.000024000 |
| 6  | 3.138574000  | -1.127671000 | -0.281025000 |
| 6  | 2.300954000  | -2.057660000 | 0.343648000  |
| 8  | 1.020006000  | -1.979708000 | 0.388190000  |
| 6  | 3.647752000  | 0.960015000  | -1.601799000 |
| 6  | 2.896052000  | -3.259841000 | 1.032263000  |
| 8  | -1.658902000 | -1.293211000 | 0.820005000  |
| 6  | -2.824216000 | -0.800835000 | 0.991469000  |
| 6  | -3.336771000 | 0.306413000  | 0.292484000  |
| 6  | -2.650902000 | 0.959873000  | -0.746949000 |
| 6  | -3.300996000 | 2.108445000  | -1.472180000 |
| 8  | -1.480266000 | 0.647378000  | -1.149635000 |
| 6  | -3.681663000 | -1.494477000 | 2.021390000  |
| 1  | 3.604333000  | 1.874214000  | -0.995121000 |
| 1  | 3.336130000  | 1.216591000  | -2.619968000 |
| 1  | 4.673279000  | 0.580340000  | -1.607575000 |
| 1  | 4.211064000  | -1.284431000 | -0.225016000 |
| 1  | 3.985595000  | -3.297653000 | 0.948873000  |
| 1  | 2.614468000  | -3.243763000 | 2.092207000  |
| 1  | 2.469452000  | -4.174827000 | 0.603145000  |
| 1  | -3.257604000 | 1.930773000  | -2.552783000 |
| 1  | -4.338166000 | 2.270899000  | -1.166206000 |
| 1  | -2.717788000 | 3.015351000  | -1.270874000 |
| 1  | -4.341006000 | 0.642595000  | 0.531137000  |
| 1  | -3.184957000 | -1.441745000 | 2.997854000  |
| 1  | -4.681926000 | -1.060046000 | 2.102277000  |
| 1  | -3.767313000 | -2.557367000 | 1.765626000  |
| 1  | -0.124110000 | -2.777026000 | -1.181169000 |
| 6  | -1.765141000 | -2.574467000 | -2.253393000 |
| 1  | -2.458467000 | -2.666171000 | -1.405963000 |
| 1  | -2.144173000 | -1.806311000 | -2.933095000 |

***cis*-Fe(acac)<sub>2</sub>(CHMeCOOMe)(MeOH) S = 3/2**

**E = -1235.66660484**

**G<sub>298K,D3,EtOH,1M</sub> = -1235.441036**

**<S<sup>2</sup>> = 4.011**

|    |              |              |              |
|----|--------------|--------------|--------------|
| 26 | 0.204770000  | 0.057267000  | 0.037572000  |
| 8  | -0.494049000 | 1.686703000  | 0.819429000  |
| 6  | -0.097995000 | 2.895667000  | 0.627149000  |
| 6  | -0.821895000 | 3.924603000  | 1.458568000  |
| 8  | 0.483453000  | -1.563270000 | -1.036916000 |
| 6  | 1.394238000  | -2.454842000 | -0.926108000 |
| 6  | 2.367679000  | -2.500408000 | 0.079406000  |
| 6  | 2.495500000  | -1.539501000 | 1.104480000  |
| 8  | 1.731478000  | -0.537767000 | 1.256594000  |
| 6  | 1.371677000  | -3.519386000 | -1.996312000 |
| 6  | 3.613930000  | -1.678166000 | 2.111749000  |
| 8  | 1.481699000  | 1.136208000  | -1.058067000 |
| 6  | 1.651956000  | 2.388388000  | -1.046956000 |
| 6  | 2.737606000  | 2.917021000  | -1.954944000 |
| 6  | 0.906096000  | 3.292350000  | -0.254960000 |
| 1  | 3.694343000  | 2.459820000  | -1.675664000 |
| 1  | 0.393065000  | -4.014470000 | -1.997493000 |
| 1  | 1.493121000  | -3.045003000 | -2.977698000 |
| 1  | 2.832341000  | 4.005732000  | -1.910759000 |
| 1  | 2.155396000  | -4.270166000 | -1.860793000 |
| 1  | 2.525439000  | 2.612779000  | -2.986658000 |
| 1  | 1.139721000  | 4.350143000  | -0.323389000 |
| 1  | 3.082387000  | -3.317294000 | 0.056173000  |
| 1  | -0.640447000 | 3.720803000  | 2.521096000  |
| 1  | 4.228835000  | -2.566483000 | 1.940743000  |
| 1  | -0.505742000 | 4.946424000  | 1.230978000  |
| 1  | 4.250573000  | -0.786172000 | 2.068035000  |
| 1  | -1.902133000 | 3.830067000  | 1.296752000  |
| 1  | 3.191327000  | -1.720524000 | 3.122758000  |
| 6  | -1.129311000 | -1.012683000 | 1.282284000  |
| 6  | -1.007239000 | -0.502674000 | 2.694014000  |
| 1  | 0.040548000  | -0.491019000 | 3.007265000  |
| 1  | -1.418151000 | 0.506997000  | 2.774908000  |



|   |              |              |              |   |              |              |              |
|---|--------------|--------------|--------------|---|--------------|--------------|--------------|
| 1 | -1.569974000 | -1.149630000 | 3.385200000  | 6 | 0.040876000  | 3.102672000  | -0.497097000 |
| 1 | -0.671063000 | -1.986923000 | 1.095084000  | 1 | -2.747766000 | 3.416057000  | 1.109135000  |
| 6 | -2.497659000 | -0.937984000 | 0.732287000  | 1 | -2.992263000 | -3.240317000 | 2.079255000  |
| 8 | -3.417303000 | -0.273666000 | 1.173922000  | 1 | -3.574826000 | -1.725232000 | 2.764664000  |
| 8 | -2.669838000 | -1.744490000 | -0.373507000 | 1 | -1.626925000 | 4.747030000  | 0.709055000  |
| 6 | -4.023993000 | -1.839281000 | -0.829032000 | 1 | -4.523113000 | -2.535562000 | 1.485594000  |
| 1 | -4.413131000 | -0.862607000 | -1.137250000 | 1 | -1.491915000 | 3.869622000  | 2.258481000  |
| 1 | -4.004157000 | -2.528652000 | -1.676445000 | 1 | -0.015111000 | 4.124186000  | -0.860696000 |
| 1 | -4.669841000 | -2.230556000 | -0.035679000 | 1 | -4.304915000 | -1.486072000 | -0.602709000 |
| 8 | -1.279677000 | 0.322264000  | -1.730929000 | 1 | 1.695856000  | 2.133230000  | -3.094403000 |
| 1 | -1.696904000 | -0.554282000 | -1.663571000 | 1 | -4.322668000 | -0.521554000 | -2.739236000 |
| 6 | -2.285189000 | 1.328155000  | -1.784283000 | 1 | 1.692470000  | 3.796113000  | -2.436439000 |
| 1 | -1.767265000 | 2.289419000  | -1.842173000 | 1 | -3.271672000 | 0.916988000  | -2.883332000 |
| 1 | -2.905651000 | 1.213266000  | -2.684682000 | 1 | 2.913581000  | 2.600516000  | -1.913717000 |
| 1 | -2.925155000 | 1.323978000  | -0.891883000 | 1 | -2.728587000 | -0.626301000 | -3.537829000 |

*cis*-Fe(acac)<sub>2</sub>(CHMeCOOMe)(MeOH) S = 5/2

E = -1235.66117678

G<sub>298K,D3,EtOH,1M</sub> = -1235.436776

<S<sup>2</sup>> = 8.759

|    |              |              |              |   |              |              |              |
|----|--------------|--------------|--------------|---|--------------|--------------|--------------|
| 26 | -0.113303000 | -0.179637000 | 0.215596000  | 6 | 1.067772000  | -2.017707000 | -0.224005000 |
| 8  | 1.150022000  | 1.019007000  | -0.755447000 | 6 | 0.336234000  | -2.723594000 | -1.345691000 |
| 6  | 0.972157000  | 2.242166000  | -1.090593000 | 1 | -0.722554000 | -2.869002000 | -1.103353000 |
| 6  | 1.864128000  | 2.742515000  | -2.198259000 | 1 | 0.405541000  | -2.155889000 | -2.279450000 |
| 8  | -1.512504000 | -1.250379000 | 1.172159000  | 1 | 0.770341000  | -3.717464000 | -1.539473000 |
| 6  | -2.704335000 | -1.534372000 | 0.824417000  | 1 | 0.948023000  | -2.472765000 | 0.763949000  |
| 6  | -3.280344000 | -1.183912000 | -0.409756000 | 6 | 2.444827000  | -1.661295000 | -0.527005000 |
| 6  | -2.597126000 | -0.476800000 | -1.410901000 | 8 | 2.995486000  | -1.623616000 | -1.610804000 |
| 8  | -1.393456000 | -0.061291000 | -1.317432000 | 8 | 3.151589000  | -1.318600000 | 0.632855000  |
| 6  | -3.513165000 | -2.306325000 | 1.836665000  | 6 | 4.485566000  | -0.863708000 | 0.403891000  |
| 6  | -3.288708000 | -0.166353000 | -2.714627000 | 1 | 4.487564000  | 0.068201000  | -0.172662000 |
| 8  | -0.820361000 | 1.582105000  | 1.115614000  | 1 | 4.924990000  | -0.702801000 | 1.391894000  |
| 6  | -0.789509000 | 2.734110000  | 0.583231000  | 1 | 5.056412000  | -1.616378000 | -0.148662000 |
| 6  | -1.711964000 | 3.767785000  | 1.188917000  | 8 | 1.145043000  | -0.251648000 | 2.038133000  |
|    |              |              |              | 1 | 1.998799000  | -0.602825000 | 1.689604000  |
|    |              |              |              | 6 | 1.393414000  | 0.856866000  | 2.895074000  |
|    |              |              |              | 1 | 0.426555000  | 1.217428000  | 3.249629000  |
|    |              |              |              | 1 | 2.002162000  | 0.541348000  | 3.753376000  |
|    |              |              |              | 1 | 1.900398000  | 1.675097000  | 2.365624000  |

## 2.P Intramolecular acrylate protonation (Part 1: to the C-bound enolate)

### P1. Freely optimized transition state (sextet):

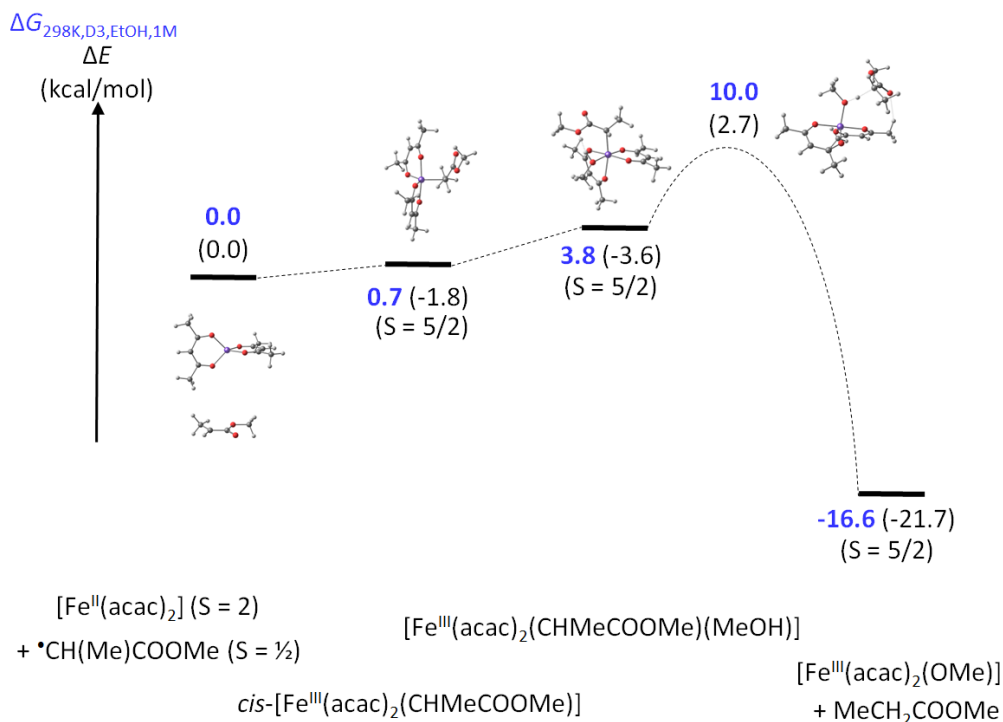

### Cartesian coordinates and energies (gas-phase E and D3-corrected G in EtOH at 298 K, in hartrees) of the optimized geometries.

|                                                   |              |              |              |   |              |              |              |
|---------------------------------------------------|--------------|--------------|--------------|---|--------------|--------------|--------------|
| <b>Intramolecular proton transfer TS S = 5/2</b>  |              |              |              | 1 | 4.476874000  | -0.075642000 | -2.866915000 |
| <b>E = -1235.65113656</b>                         |              |              |              | 1 | -0.470145000 | 4.971661000  | -1.250159000 |
| <b>G<sub>298K,D3,EtOH,1M</sub> = -1235.426910</b> |              |              |              | 1 | 5.462125000  | -1.253583000 | -1.954543000 |
| <b>&lt;S<sup>2</sup>&gt; = 8.768</b>              |              |              |              | 1 | 0.006282000  | 3.865492000  | -2.570091000 |
| 26                                                | 0.866522000  | 0.171552000  | -0.048180000 | 1 | -1.542822000 | 3.870782000  | 0.512438000  |
| 8                                                 | -0.601999000 | 0.768528000  | 1.201955000  | 1 | 5.097864000  | -1.175562000 | 0.359182000  |
| 6                                                 | -1.224314000 | 1.877526000  | 1.245855000  | 1 | -1.898629000 | 1.703865000  | 3.264069000  |
| 6                                                 | -2.304069000 | 1.990924000  | 2.286773000  | 1 | 4.977924000  | -1.188433000 | 2.700401000  |
| 8                                                 | 2.350034000  | -0.387074000 | -1.323184000 | 1 | -2.728571000 | 2.997137000  | 2.347056000  |
| 6                                                 | 3.547157000  | -0.726282000 | -1.055774000 | 1 | 3.850585000  | 0.039017000  | 3.344534000  |
| 6                                                 | 4.059995000  | -0.877763000 | 0.247144000  | 1 | -3.095129000 | 1.272352000  | 2.032010000  |
| 6                                                 | 3.301570000  | -0.677276000 | 1.407695000  | 1 | 3.363490000  | -1.653315000 | 3.307552000  |
| 8                                                 | 2.071674000  | -0.318766000 | 1.426777000  | 6 | -2.495450000 | -2.198315000 | 0.469209000  |
| 6                                                 | 4.444205000  | -0.977416000 | -2.243722000 | 6 | -2.185983000 | -2.267174000 | 1.933893000  |
| 6                                                 | 3.928461000  | -0.887261000 | 2.762619000  | 1 | -1.270350000 | -2.841578000 | 2.116824000  |
| 8                                                 | 0.723263000  | 1.920803000  | -0.940197000 | 1 | -2.055407000 | -1.264922000 | 2.351926000  |
| 6                                                 | -0.019723000 | 2.927376000  | -0.649488000 | 1 | -2.998504000 | -2.759241000 | 2.493876000  |
| 6                                                 | 0.184586000  | 4.139431000  | -1.523138000 | 1 | -2.463893000 | -3.134227000 | -0.095141000 |
| 6                                                 | -0.965829000 | 2.961086000  | 0.378326000  | 6 | -3.527373000 | -1.271533000 | 0.018952000  |
| 1                                                 | 1.230143000  | 4.463411000  | -1.452674000 | 8 | -4.046022000 | -0.379427000 | 0.678374000  |
| 1                                                 | 4.017122000  | -1.777200000 | -2.861032000 | 8 | -3.855991000 | -1.487124000 | -1.289095000 |

|   |              |              |              |   |              |              |              |
|---|--------------|--------------|--------------|---|--------------|--------------|--------------|
| 6 | -4.829292000 | -0.585981000 | -1.813172000 | 1 | -1.261043000 | -1.565833000 | -0.168733000 |
| 1 | -4.475530000 | 0.450170000  | -1.758669000 | 6 | -0.215907000 | -2.074074000 | -1.865047000 |
| 1 | -4.980513000 | -0.881253000 | -2.854380000 | 1 | -0.042990000 | -3.123372000 | -1.589359000 |
| 1 | -5.771254000 | -0.657672000 | -1.257530000 | 1 | -1.121196000 | -2.004776000 | -2.480692000 |
| 8 | -0.349978000 | -1.260949000 | -0.703857000 | 1 | 0.647941000  | -1.705166000 | -2.424205000 |

**P2.** The geometry of the optimized sextet TS involves full rupture of the Fe-C bond, adoption of a tbp geometry with equatorial methanol (like in optimized  $[\text{Fe}(\text{acac})_2(\text{EtOH})]$ ), and location of the H proton still quite close to the methanol O atom (1.100 Å) but also not far from the methyl acrylate radical C atom (1.527 Å). The relative geometry of the alcohol OH bond and acrylate radical is rather close to that of the TS previously obtained for the CPET pathway (optimized in the presence of two EtOH molecule). The two pathways (CPET and intramolecular proton transfer for the alkyl adduct), with the energies and geometries of the two TS's, are compared below.

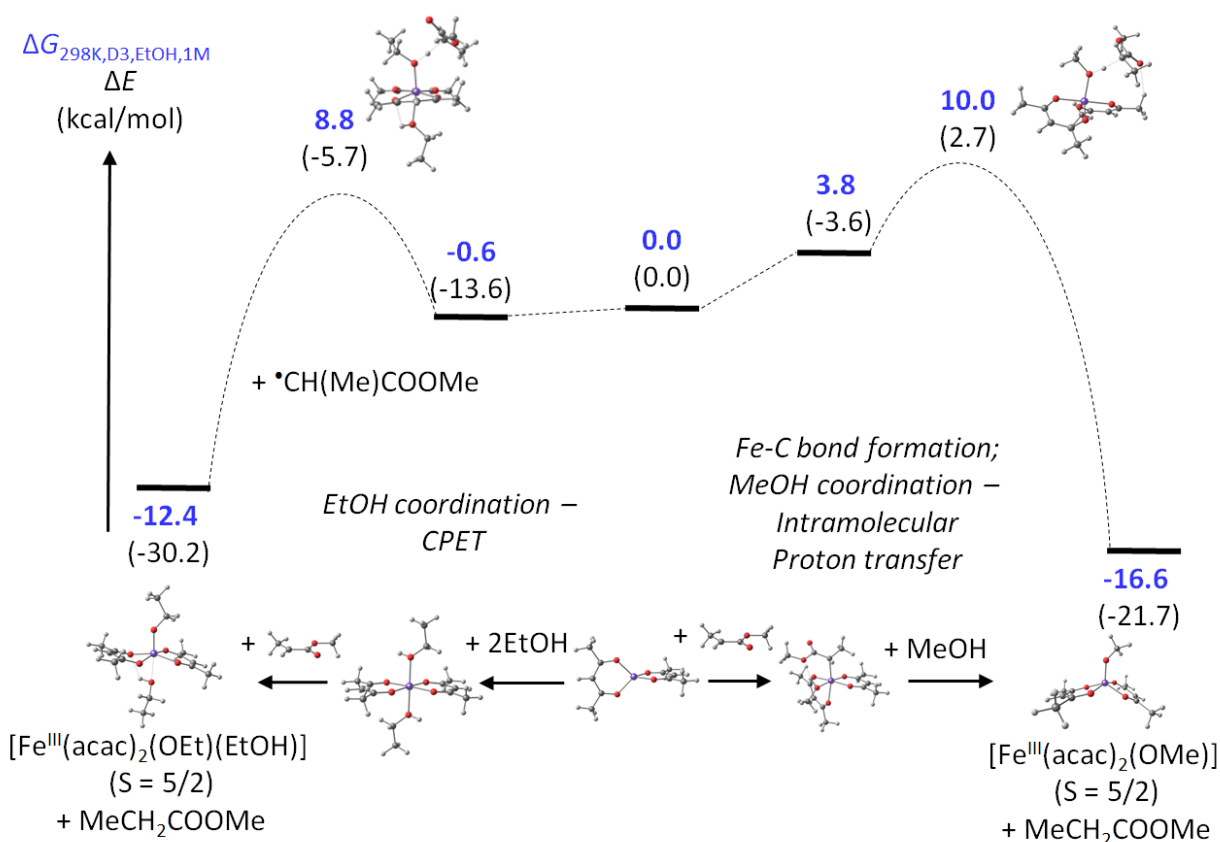

**P3.** The next figure compares the two TS geometries in closer detail.

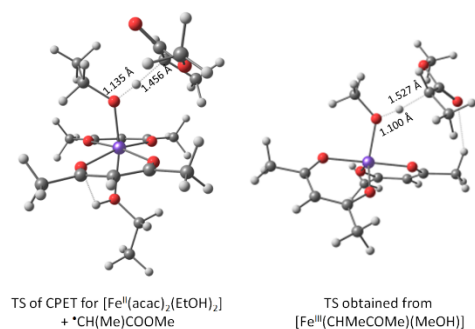

We conclude that this pathway corresponds to another CPET transition state. The slight energy difference is due to the coordination of one extra alcohol molecule and to the minor difference between MeOH and EtOH. Therefore, bond formation does not help proton transfer.

An attempt to free optimize the transition state for the intramolecular proton transfer in the quartet state failed.

#### **P4. Relaxed scan along the C...H parameter**

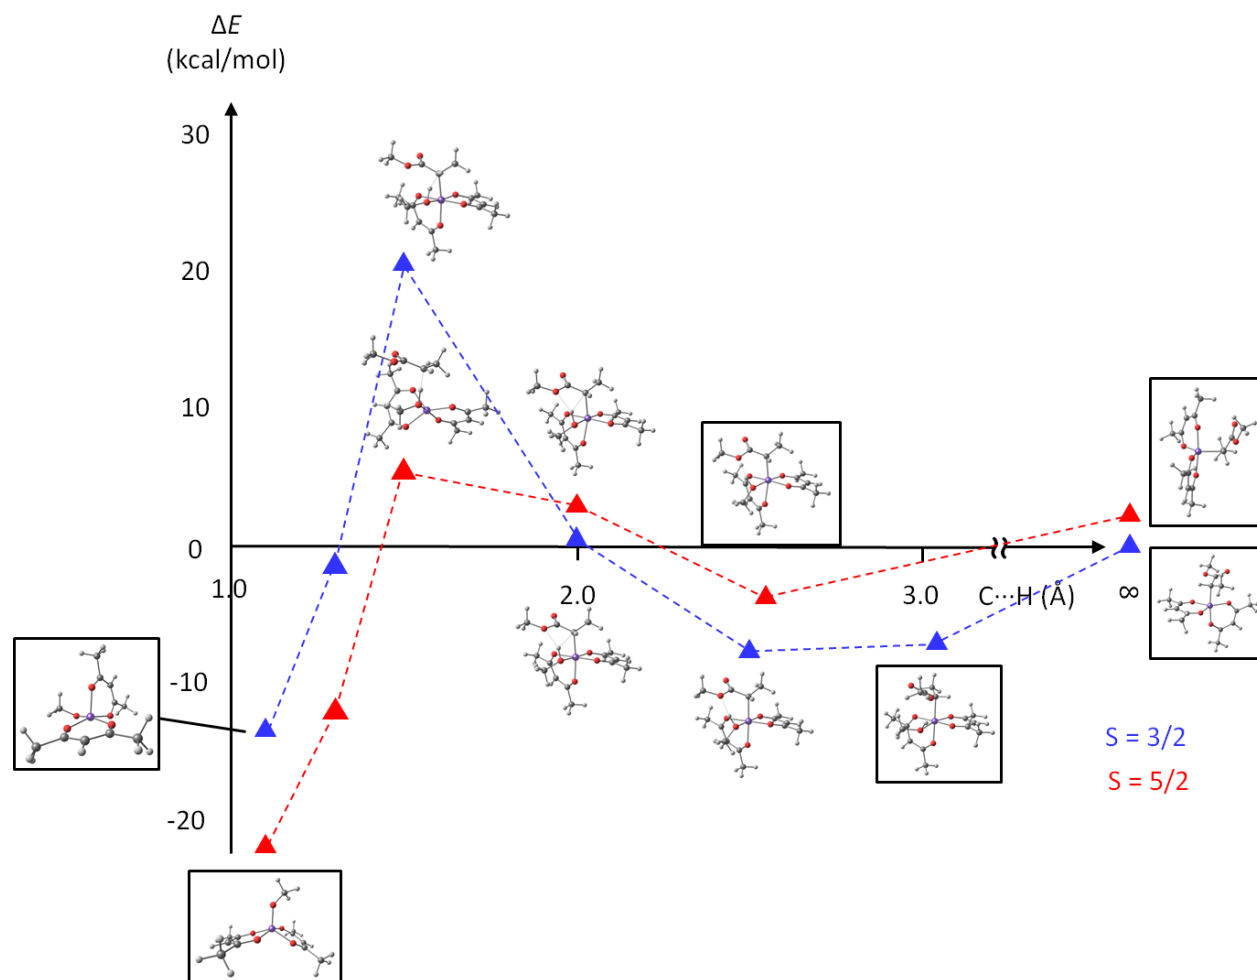

At infinite distance, we start from Fe(acac)<sub>2</sub>(CHMeCOOMe) (section H) plus methanol. The other geometries shown in black frames at intermediate C...H distances are the fully optimized adducts, Fe(acac)<sub>2</sub>(CHMeCOOMe)(MeOH) already described above (section M). The other points correspond to partially optimized geometries at fixed C...H, except the last ones on the left at C-H = 1.099 Å, which correspond to the energies of the sum of fully optimized CH<sub>3</sub>CH<sub>2</sub>COOMe (section K) plus Fe(acac)<sub>2</sub>(OMe) (section N) in each spin state. The y axis values are uncorrected electronic energies. The relative G values of the fully optimized structures are above in the corresponding sections.

Proton transfer is easier on the sextet PES. The highest point at C-H = 1.5 Å is at 5.3 kcal/mol. The Fe-C bond has already broken (3.94 Å) and the two acac ligands have rearranged from the perpendicular arrangement of the cis-octahedral environment, with the acac ligand parallel to the Fe-C bond axis of the leaving alkyl group swinging on its way to the relative configuration in the final sextet Fe(acac)<sub>2</sub>(OMe). For comparison, the TS for the process on the sextet surface, which corresponds to the CPET, on the same energy scale (relative to quartet Fe(acac)<sub>2</sub>(CHMeCOMe) plus methanol) has E = 2.7 kcal/mol (G = 10.0 kcal/mol), hence easier. It is therefore evident that a direct proton transfer path is less favorable than CPET (the TS must be higher than the highest point on the PES explored by the relaxed scan).

Along the quartet PES, there is still a Fe-C bond for C-H = 1.5 Å. The coordination geometry is octahedral, and the energy is much higher. An intramolecular proton transfer via the quartet surface can be discarded.

**Cartesian coordinates and energies (gas-phase E in hartrees) of the partially optimized geometries along the relaxed scan.**

|                                                             |              |              |              |                                                             |              |              |              |
|-------------------------------------------------------------|--------------|--------------|--------------|-------------------------------------------------------------|--------------|--------------|--------------|
| <b>Fe(CHMeCOOMe)(acac)<sub>2</sub>(MeOH) S = 5/2 (C-H =</b> |              |              |              | 1                                                           | -4.329872000 | -0.594914000 | -2.868415000 |
| <b>2.0 Å)</b>                                               |              |              |              | 1                                                           | 1.679381000  | 3.820315000  | -2.375054000 |
| <b>E = -1235.65057313</b>                                   |              |              |              | 1                                                           | -3.321066000 | 0.876404000  | -2.972371000 |
| <b>&lt;S<sup>2</sup>&gt; = 8.760</b>                        |              |              |              | 1                                                           | 2.866884000  | 2.576392000  | -1.886619000 |
| 26                                                          | -0.224013000 | -0.149614000 | 0.217421000  | 1                                                           | -2.708102000 | -0.645473000 | -3.615216000 |
| 8                                                           | 1.069267000  | 1.026714000  | -0.744977000 | 6                                                           | 1.094954000  | -1.943685000 | -0.048627000 |
| 6                                                           | 0.920390000  | 2.259043000  | -1.059761000 | 6                                                           | 0.355080000  | -2.692545000 | -1.146419000 |
| 6                                                           | 1.820814000  | 2.757094000  | -2.161115000 | 1                                                           | -0.696759000 | -2.855511000 | -0.886863000 |
| 8                                                           | -1.626426000 | -1.251968000 | 1.128583000  | 1                                                           | 0.402109000  | -2.144469000 | -2.093332000 |
| 6                                                           | -2.803455000 | -1.558014000 | 0.748932000  | 1                                                           | 0.807712000  | -3.680835000 | -1.325700000 |
| 6                                                           | -3.348773000 | -1.224037000 | -0.503306000 | 1                                                           | 1.017659000  | -2.444413000 | 0.922414000  |
| 6                                                           | -2.650600000 | -0.502992000 | -1.484333000 | 6                                                           | 2.465754000  | -1.597519000 | -0.425417000 |
| 8                                                           | -1.460338000 | -0.059990000 | -1.353272000 | 8                                                           | 2.947944000  | -1.542929000 | -1.540392000 |
| 6                                                           | -3.627514000 | -2.337487000 | 1.742724000  | 8                                                           | 3.217252000  | -1.300518000 | 0.699517000  |
| 6                                                           | -3.308865000 | -0.207851000 | -2.808712000 | 6                                                           | 4.544599000  | -0.847021000 | 0.438575000  |
| 8                                                           | -0.883503000 | 1.589807000  | 1.128053000  | 1                                                           | 4.532125000  | 0.099583000  | -0.113659000 |
| 6                                                           | -0.823882000 | 2.755770000  | 0.626806000  | 1                                                           | 5.016951000  | -0.712449000 | 1.414740000  |
| 6                                                           | -1.714477000 | 3.794583000  | 1.268324000  | 1                                                           | 5.093564000  | -1.587083000 | -0.152858000 |
| 6                                                           | 0.011414000  | 3.129964000  | -0.446572000 | 8                                                           | 0.982036000  | -0.315281000 | 2.047916000  |
| 1                                                           | -2.759289000 | 3.470137000  | 1.191619000  | 1                                                           | 1.619947000  | -0.890481000 | 1.568514000  |
| 1                                                           | -3.099578000 | -3.262370000 | 2.004338000  | 6                                                           | 1.661775000  | 0.795220000  | 2.622908000  |
| 1                                                           | -3.722223000 | -1.752860000 | 2.665671000  | 1                                                           | 0.900859000  | 1.434324000  | 3.075405000  |
| 1                                                           | -1.609867000 | 4.783214000  | 0.812328000  | 1                                                           | 2.358086000  | 0.451415000  | 3.398722000  |
| 1                                                           | -4.624138000 | -2.583423000 | 1.365786000  | 1                                                           | 2.208909000  | 1.369604000  | 1.864666000  |
| 1                                                           | -1.480311000 | 3.862970000  | 2.337528000  |                                                             |              |              |              |
| 1                                                           | -0.019931000 | 4.160732000  | -0.786013000 |                                                             |              |              |              |
| 1                                                           | -4.361022000 | -1.546683000 | -0.725847000 |                                                             |              |              |              |
| 1                                                           | 1.628873000  | 2.173211000  | -3.069373000 |                                                             |              |              |              |
|                                                             |              |              |              | <b>Fe(CHMeCOOMe)(acac)<sub>2</sub>(MeOH) S = 5/2 (C-H =</b> |              |              |              |
|                                                             |              |              |              | <b>1.5 Å)</b>                                               |              |              |              |
|                                                             |              |              |              | <b>E = -1235.64705748</b>                                   |              |              |              |

$\langle S^2 \rangle = 8.775$

|    |              |              |              |
|----|--------------|--------------|--------------|
| 26 | -1.137523000 | 0.402385000  | 0.269693000  |
| 8  | 0.169555000  | 0.774977000  | -1.152413000 |
| 6  | 0.802875000  | 1.867403000  | -1.351573000 |
| 6  | 1.820486000  | 1.829289000  | -2.460415000 |
| 8  | -1.857946000 | -1.434747000 | 0.518578000  |
| 6  | -2.987533000 | -1.939643000 | 0.179906000  |
| 6  | -4.020016000 | -1.241153000 | -0.453740000 |
| 6  | -3.926239000 | 0.117963000  | -0.820959000 |
| 8  | -2.909974000 | 0.847812000  | -0.609235000 |
| 6  | -3.163476000 | -3.400253000 | 0.514056000  |
| 6  | -5.088833000 | 0.784006000  | -1.517697000 |
| 8  | -0.962345000 | 2.249102000  | 0.989736000  |
| 6  | -0.255282000 | 3.186773000  | 0.485033000  |
| 6  | -0.396999000 | 4.533542000  | 1.153300000  |
| 6  | 0.617313000  | 3.048376000  | -0.608203000 |
| 1  | -1.437467000 | 4.869357000  | 1.063109000  |
| 1  | -2.398514000 | -3.987552000 | -0.009171000 |
| 1  | -3.000975000 | -3.548940000 | 1.588385000  |
| 1  | 0.261458000  | 5.292631000  | 0.721738000  |
| 1  | -4.152324000 | -3.780156000 | 0.241864000  |
| 1  | -0.185417000 | 4.436450000  | 2.224945000  |
| 1  | 1.188010000  | 3.921912000  | -0.908571000 |
| 1  | -4.936648000 | -1.775409000 | -0.683919000 |
| 1  | 1.352930000  | 1.443175000  | -3.373645000 |
| 1  | -5.936394000 | 0.108940000  | -1.667204000 |
| 1  | 2.263286000  | 2.808805000  | -2.662263000 |
| 1  | -5.415188000 | 1.649584000  | -0.928843000 |
| 1  | 2.610964000  | 1.123235000  | -2.173106000 |
| 1  | -4.755852000 | 1.165983000  | -2.490344000 |
| 6  | 2.107000000  | -1.856019000 | 0.723425000  |
| 6  | 1.360204000  | -2.344939000 | -0.473036000 |
| 1  | 0.316346000  | -2.570359000 | -0.220916000 |
| 1  | 1.379010000  | -1.594619000 | -1.268845000 |
| 1  | 1.811996000  | -3.271349000 | -0.865476000 |
| 1  | 2.128582000  | -2.484419000 | 1.617246000  |
| 6  | 3.289310000  | -1.020287000 | 0.525961000  |
| 8  | 3.639809000  | -0.502475000 | -0.525393000 |
| 8  | 3.978303000  | -0.850544000 | 1.689459000  |
| 6  | 5.142488000  | -0.032364000 | 1.576617000  |
| 1  | 4.884215000  | 0.971076000  | 1.219394000  |
| 1  | 5.570705000  | 0.018117000  | 2.580366000  |
| 1  | 5.862781000  | -0.471637000 | 0.877255000  |
| 8  | 0.332815000  | -0.250145000 | 1.657807000  |
| 1  | 1.091441000  | -0.894528000 | 1.265803000  |
| 6  | 0.940244000  | 0.584348000  | 2.636664000  |
| 1  | 0.141022000  | 1.147108000  | 3.126704000  |
| 1  | 1.467738000  | -0.024341000 | 3.382260000  |
| 1  | 1.645026000  | 1.298267000  | 2.189225000  |

$E = -1235.67437939$

$\langle S^2 \rangle = 8.762$

|    |              |              |              |
|----|--------------|--------------|--------------|
| 26 | -0.983943000 | 0.911325000  | 0.452452000  |
| 8  | -0.609805000 | 2.128069000  | -1.068253000 |
| 6  | -0.531037000 | 3.402873000  | -1.131570000 |
| 6  | -0.165702000 | 3.958576000  | -2.483763000 |
| 8  | -2.595968000 | 0.230390000  | 1.389080000  |
| 6  | -3.315424000 | -0.800681000 | 1.158387000  |
| 6  | -3.158021000 | -1.653395000 | 0.057346000  |
| 6  | -2.182630000 | -1.451605000 | -0.933506000 |
| 8  | -1.342656000 | -0.492855000 | -0.933351000 |
| 6  | -4.398639000 | -1.067543000 | 2.172081000  |
| 6  | -2.088569000 | -2.400844000 | -2.100979000 |
| 8  | -1.231107000 | 2.581579000  | 1.544102000  |
| 6  | -1.100359000 | 3.810099000  | 1.230997000  |
| 6  | -1.341374000 | 4.797048000  | 2.344935000  |
| 6  | -0.758712000 | 4.267958000  | -0.052828000 |
| 1  | -2.361048000 | 4.665954000  | 2.726614000  |
| 1  | -3.941498000 | -1.198591000 | 3.160258000  |
| 1  | -5.056101000 | -0.192401000 | 2.238008000  |
| 1  | -1.204610000 | 5.834143000  | 2.026349000  |
| 1  | -4.994633000 | -1.951455000 | 1.928853000  |
| 1  | -0.659618000 | 4.579096000  | 3.175605000  |
| 1  | -0.671823000 | 5.337080000  | -0.217783000 |
| 1  | -3.830076000 | -2.499689000 | -0.041890000 |
| 1  | -0.891863000 | 3.608291000  | -3.226908000 |
| 1  | -2.839884000 | -3.194305000 | -2.060615000 |
| 1  | -0.133051000 | 5.051461000  | -2.494680000 |
| 1  | -2.204129000 | -1.837506000 | -3.034632000 |
| 1  | 0.812677000  | 3.563720000  | -2.783182000 |
| 1  | -1.088524000 | -2.850016000 | -2.120024000 |
| 6  | 2.269365000  | -1.877581000 | -0.731200000 |
| 6  | 2.475161000  | -0.921424000 | -1.894283000 |
| 1  | 1.512913000  | -0.646768000 | -2.337417000 |
| 1  | 2.973523000  | -0.009241000 | -1.551654000 |
| 1  | 3.103450000  | -1.370873000 | -2.674425000 |
| 1  | 1.830933000  | -2.836612000 | -1.024130000 |
| 6  | 3.502247000  | -2.100193000 | 0.094210000  |
| 8  | 4.388508000  | -1.287617000 | 0.279601000  |
| 8  | 3.507648000  | -3.330334000 | 0.659198000  |
| 6  | 4.618006000  | -3.588030000 | 1.521716000  |
| 1  | 4.629816000  | -2.885786000 | 2.362757000  |
| 1  | 4.484809000  | -4.610679000 | 1.881954000  |
| 1  | 5.564311000  | -3.493138000 | 0.978196000  |
| 8  | 0.520785000  | 0.237893000  | 1.217509000  |
| 1  | 1.417338000  | -1.344033000 | 0.093043000  |
| 6  | 1.607182000  | 0.878775000  | 1.827487000  |
| 1  | 1.577404000  | 1.970771000  | 1.688896000  |
| 1  | 1.609511000  | 0.672002000  | 2.909507000  |
| 1  | 2.551048000  | 0.500957000  | 1.406232000  |

**Fe(CHMeCOOMe)(acac)<sub>2</sub>(MeOH) S = 5/2 (C-H = 1.3 Å)**

**Fe(CHMeCOOMe)(acac)<sub>2</sub>(MeOH) S = 3/2 (C-H = 2.5 Å)**

**E = -1235.66766868**

**<S<sup>2</sup>> = 3.998**

|    |              |              |              |
|----|--------------|--------------|--------------|
| 26 | -0.064293000 | -0.305398000 | -0.270762000 |
| 8  | -0.986182000 | 1.313218000  | 0.386311000  |
| 6  | -0.452554000 | 2.476571000  | 0.464230000  |
| 6  | -1.186549000 | 3.450777000  | 1.351487000  |
| 8  | 0.750783000  | -1.923444000 | -0.981666000 |
| 6  | 1.894944000  | -2.427069000 | -0.699365000 |
| 6  | 2.737963000  | -2.005906000 | 0.334844000  |
| 6  | 2.438423000  | -0.951479000 | 1.227296000  |
| 8  | 1.379460000  | -0.258309000 | 1.193640000  |
| 6  | 2.314080000  | -3.574771000 | -1.585999000 |
| 6  | 3.423311000  | -0.611386000 | 2.323394000  |
| 8  | 1.098005000  | 0.870684000  | -1.407993000 |
| 6  | 1.373831000  | 2.085005000  | -1.158850000 |
| 6  | 2.501913000  | 2.679981000  | -1.968645000 |
| 6  | 0.693577000  | 2.889964000  | -0.222889000 |
| 1  | 3.409273000  | 2.084283000  | -1.813527000 |
| 1  | 1.555709000  | -4.365801000 | -1.542470000 |
| 1  | 2.356767000  | -3.229683000 | -2.626175000 |
| 1  | 2.704156000  | 3.722948000  | -1.708877000 |
| 1  | 3.285788000  | -3.990293000 | -1.304204000 |
| 1  | 2.256971000  | 2.616282000  | -3.035825000 |
| 1  | 1.028461000  | 3.913556000  | -0.086976000 |
| 1  | 3.678412000  | -2.532652000 | 0.465632000  |
| 1  | -1.308687000 | 3.005899000  | 2.345688000  |
| 1  | 4.339269000  | -1.207274000 | 2.271319000  |
| 1  | -0.670581000 | 4.411070000  | 1.438507000  |
| 1  | 3.678513000  | 0.453112000  | 2.263326000  |
| 1  | -2.193942000 | 3.623451000  | 0.952055000  |
| 1  | 2.947393000  | -0.771295000 | 3.298713000  |
| 6  | -1.428991000 | -1.533986000 | 0.757329000  |
| 6  | -0.737137000 | -2.243810000 | 1.895880000  |
| 1  | 0.161124000  | -2.764570000 | 1.552284000  |
| 1  | -0.460783000 | -1.537743000 | 2.683745000  |
| 1  | -1.411297000 | -2.991907000 | 2.342151000  |
| 1  | -1.679504000 | -2.183765000 | -0.087505000 |
| 6  | -2.577646000 | -0.715204000 | 1.200053000  |
| 8  | -2.813642000 | -0.321218000 | 2.321416000  |
| 8  | -3.433239000 | -0.445143000 | 0.149413000  |
| 6  | -4.529569000 | 0.415523000  | 0.470793000  |
| 1  | -4.163757000 | 1.397760000  | 0.786954000  |
| 1  | -5.124214000 | 0.500182000  | -0.441692000 |
| 1  | -5.127547000 | -0.016799000 | 1.278851000  |
| 8  | -1.606174000 | -0.423355000 | -1.853178000 |
| 1  | -2.394626000 | -0.428249000 | -1.266256000 |
| 6  | -1.716520000 | 0.634572000  | -2.797403000 |
| 1  | -0.792379000 | 0.642239000  | -3.379747000 |
| 1  | -2.566347000 | 0.463528000  | -3.472522000 |
| 1  | -1.828518000 | 1.609267000  | -2.303319000 |

**Fe(CHMeCOOMe)(acac)<sub>2</sub>(MeOH) S = 3/2 (C-H = 2.0 Å)**

**E = -1235.6543992**

**<S<sup>2</sup>> = 3.958**

|    |              |              |              |
|----|--------------|--------------|--------------|
| 26 | 0.017380000  | -0.294581000 | -0.297596000 |
| 8  | -0.917185000 | 1.328061000  | 0.330658000  |
| 6  | -0.381254000 | 2.490115000  | 0.403495000  |
| 6  | -1.134941000 | 3.478502000  | 1.257774000  |
| 8  | 0.848041000  | -1.910422000 | -0.989574000 |
| 6  | 1.981237000  | -2.416545000 | -0.675590000 |
| 6  | 2.787921000  | -2.004350000 | 0.392471000  |
| 6  | 2.454760000  | -0.959091000 | 1.280320000  |
| 8  | 1.398872000  | -0.260234000 | 1.206713000  |
| 6  | 2.430724000  | -3.556321000 | -1.557366000 |
| 6  | 3.391068000  | -0.628894000 | 2.420120000  |
| 8  | 1.195032000  | 0.859080000  | -1.420998000 |
| 6  | 1.471693000  | 2.075503000  | -1.179132000 |
| 6  | 2.614791000  | 2.655093000  | -1.978082000 |
| 6  | 0.781934000  | 2.891649000  | -0.261818000 |
| 1  | 3.521260000  | 2.068707000  | -1.785958000 |
| 1  | 1.671553000  | -4.347633000 | -1.547858000 |
| 1  | 2.509886000  | -3.201259000 | -2.591970000 |
| 1  | 2.805990000  | 3.705580000  | -1.741439000 |
| 1  | 3.391967000  | -3.974459000 | -1.245203000 |
| 1  | 2.394408000  | 2.560163000  | -3.048104000 |
| 1  | 1.118206000  | 3.915365000  | -0.130668000 |
| 1  | 3.722388000  | -2.533060000 | 0.554060000  |
| 1  | -1.299444000 | 3.040495000  | 2.248743000  |
| 1  | 4.300662000  | -1.236531000 | 2.411622000  |
| 1  | -0.610766000 | 4.433064000  | 1.357421000  |
| 1  | 3.662846000  | 0.432118000  | 2.369963000  |
| 1  | -2.124363000 | 3.660860000  | 0.819405000  |
| 1  | 2.867829000  | -0.779634000 | 3.372328000  |
| 6  | -1.447356000 | -1.481638000 | 0.610193000  |
| 6  | -0.782037000 | -2.264447000 | 1.728660000  |
| 1  | 0.091957000  | -2.812977000 | 1.366902000  |
| 1  | -0.475058000 | -1.596004000 | 2.537378000  |
| 1  | -1.488166000 | -2.995880000 | 2.151794000  |
| 1  | -1.745658000 | -2.149893000 | -0.206907000 |
| 6  | -2.567567000 | -0.654191000 | 1.129437000  |
| 8  | -2.720719000 | -0.253424000 | 2.262619000  |
| 8  | -3.478498000 | -0.399163000 | 0.136267000  |
| 6  | -4.568221000 | 0.446313000  | 0.511161000  |
| 1  | -4.200819000 | 1.431681000  | 0.815927000  |
| 1  | -5.204215000 | 0.528768000  | -0.372972000 |
| 1  | -5.125192000 | 0.004879000  | 1.343949000  |
| 8  | -1.515579000 | -0.508337000 | -1.857380000 |
| 1  | -2.124319000 | -0.776035000 | -1.134469000 |
| 6  | -2.051201000 | 0.601692000  | -2.566663000 |
| 1  | -1.255118000 | 0.978200000  | -3.214306000 |
| 1  | -2.901078000 | 0.287508000  | -3.187216000 |

1 -2.367077000 1.399825000 -1.883933000

**Fe(CHMeCOOMe)(acac)<sub>2</sub>(MeOH) S = 3/2 (C-H = 1.5 Å)**

**E = -1235.62305684**

**<S<sup>2</sup>> = 3.923**

|    |              |              |              |
|----|--------------|--------------|--------------|
| 26 | 0.089826000  | -0.266150000 | -0.328980000 |
| 8  | -0.840202000 | 1.345417000  | 0.276459000  |
| 6  | -0.308808000 | 2.509363000  | 0.341817000  |
| 6  | -1.101413000 | 3.513991000  | 1.138470000  |
| 8  | 0.920792000  | -1.877007000 | -0.995587000 |
| 6  | 2.061474000  | -2.361482000 | -0.675519000 |
| 6  | 2.839543000  | -1.955313000 | 0.416189000  |
| 6  | 2.459260000  | -0.947535000 | 1.325627000  |
| 8  | 1.388846000  | -0.268919000 | 1.242146000  |
| 6  | 2.547810000  | -3.472225000 | -1.573507000 |
| 6  | 3.352032000  | -0.633550000 | 2.503084000  |
| 8  | 1.340245000  | 0.837433000  | -1.376191000 |
| 6  | 1.608032000  | 2.060342000  | -1.147788000 |
| 6  | 2.785560000  | 2.615391000  | -1.911083000 |
| 6  | 0.882491000  | 2.896979000  | -0.281313000 |
| 1  | 3.675688000  | 2.016175000  | -1.685982000 |
| 1  | 1.806128000  | -4.279682000 | -1.591768000 |
| 1  | 2.633578000  | -3.093421000 | -2.599021000 |
| 1  | 2.983744000  | 3.664588000  | -1.675209000 |
| 1  | 3.513190000  | -3.875436000 | -1.254897000 |
| 1  | 2.596929000  | 2.516291000  | -2.986784000 |
| 1  | 1.213727000  | 3.923253000  | -0.159299000 |
| 1  | 3.781887000  | -2.467417000 | 0.584490000  |
| 1  | -1.318722000 | 3.092831000  | 2.126415000  |
| 1  | 4.273117000  | -1.223516000 | 2.505919000  |
| 1  | -0.579077000 | 4.468366000  | 1.247810000  |
| 1  | 3.603818000  | 0.433524000  | 2.492748000  |
| 1  | -2.065450000 | 3.690455000  | 0.644823000  |
| 1  | 2.801782000  | -0.822155000 | 3.433047000  |
| 6  | -1.533022000 | -1.430700000 | 0.428664000  |
| 6  | -0.858760000 | -2.262201000 | 1.524825000  |
| 1  | -0.033091000 | -2.854337000 | 1.122366000  |
| 1  | -0.483677000 | -1.614644000 | 2.320850000  |
| 1  | -1.587187000 | -2.954558000 | 1.972844000  |
| 1  | -1.946416000 | -2.154024000 | -0.294075000 |
| 6  | -2.611750000 | -0.591412000 | 1.042021000  |
| 8  | -2.630772000 | -0.172477000 | 2.180491000  |
| 8  | -3.624968000 | -0.364169000 | 0.162071000  |
| 6  | -4.687574000 | 0.444606000  | 0.670086000  |
| 1  | -4.315653000 | 1.431179000  | 0.966328000  |
| 1  | -5.410636000 | 0.535319000  | -0.143673000 |
| 1  | -5.151180000 | -0.028556000 | 1.542430000  |
| 8  | -1.437863000 | -0.564571000 | -1.896145000 |
| 1  | -1.723638000 | -0.957642000 | -0.981968000 |
| 6  | -2.286658000 | 0.449017000  | -2.404789000 |
| 1  | -1.818685000 | 0.835793000  | -3.317073000 |

1 -3.273972000 0.040660000 -2.658315000

1 -2.414510000 1.273942000 -1.692709000

**Fe(CHMeCOOMe)(acac)<sub>2</sub>(MeOH) S = 3/2 (C-H = 1.3 Å)**

**E = -1235.65863976**

**<S<sup>2</sup>> = 3.800**

|    |              |              |              |
|----|--------------|--------------|--------------|
| 26 | 0.358050000  | -0.114056000 | -0.712958000 |
| 8  | -0.612680000 | 1.389488000  | -0.098902000 |
| 6  | -0.100353000 | 2.565354000  | 0.026302000  |
| 6  | -0.904953000 | 3.485332000  | 0.908534000  |
| 8  | 1.207293000  | -1.774430000 | -1.123301000 |
| 6  | 2.273910000  | -2.259112000 | -0.623137000 |
| 6  | 2.938029000  | -1.735268000 | 0.499388000  |
| 6  | 2.407166000  | -0.673168000 | 1.232174000  |
| 8  | 1.347660000  | -0.027655000 | 0.903075000  |
| 6  | 2.794237000  | -3.497089000 | -1.306409000 |
| 6  | 3.046192000  | -0.225689000 | 2.518854000  |
| 8  | 1.664206000  | 1.080773000  | -1.805345000 |
| 6  | 1.853092000  | 2.294256000  | -1.499523000 |
| 6  | 3.007868000  | 2.982118000  | -2.191349000 |
| 6  | 1.061618000  | 3.034119000  | -0.586619000 |
| 1  | 3.928229000  | 2.416378000  | -2.004766000 |
| 1  | 2.020165000  | -4.273120000 | -1.288954000 |
| 1  | 2.996652000  | -3.268572000 | -2.359304000 |
| 1  | 3.145053000  | 4.017575000  | -1.866906000 |
| 1  | 3.702958000  | -3.880714000 | -0.835142000 |
| 1  | 2.835988000  | 2.963990000  | -3.274349000 |
| 1  | 1.342947000  | 4.064827000  | -0.393214000 |
| 1  | 3.835896000  | -2.227539000 | 0.856906000  |
| 1  | -1.014582000 | 3.026396000  | 1.898209000  |
| 1  | 3.949684000  | -0.794330000 | 2.754577000  |
| 1  | -0.445877000 | 4.472288000  | 1.010428000  |
| 1  | 3.292777000  | 0.840415000  | 2.450340000  |
| 1  | -1.913486000 | 3.599554000  | 0.492392000  |
| 1  | 2.324203000  | -0.336144000 | 3.336955000  |
| 6  | -2.656534000 | -2.135945000 | 0.446012000  |
| 6  | -1.659643000 | -3.102225000 | 1.057398000  |
| 1  | -1.277585000 | -3.793639000 | 0.298591000  |
| 1  | -0.815212000 | -2.561745000 | 1.497021000  |
| 1  | -2.120529000 | -3.692628000 | 1.859143000  |
| 1  | -3.519565000 | -2.623816000 | -0.018036000 |
| 6  | -3.122836000 | -1.065886000 | 1.389425000  |
| 8  | -2.595020000 | -0.761140000 | 2.441019000  |
| 8  | -4.226854000 | -0.437855000 | 0.913043000  |
| 6  | -4.705474000 | 0.629887000  | 1.732395000  |
| 1  | -3.950696000 | 1.418454000  | 1.824337000  |
| 1  | -5.597901000 | 1.013003000  | 1.231739000  |
| 1  | -4.955657000 | 0.270864000  | 2.736894000  |
| 8  | -0.868695000 | -0.487853000 | -1.940004000 |
| 1  | -2.069741000 | -1.494441000 | -0.520501000 |
| 6  | -1.609412000 | 0.489609000  | -2.623821000 |



1 -0.956323000 1.251453000 -3.076019000 1 -2.333645000 0.989560000 -1.964459000  
 1 -2.159386000 -0.012890000 -3.433705000

## 2.Q Intramolecular acrylate protonation (Part 2: to the O-bound enolate)

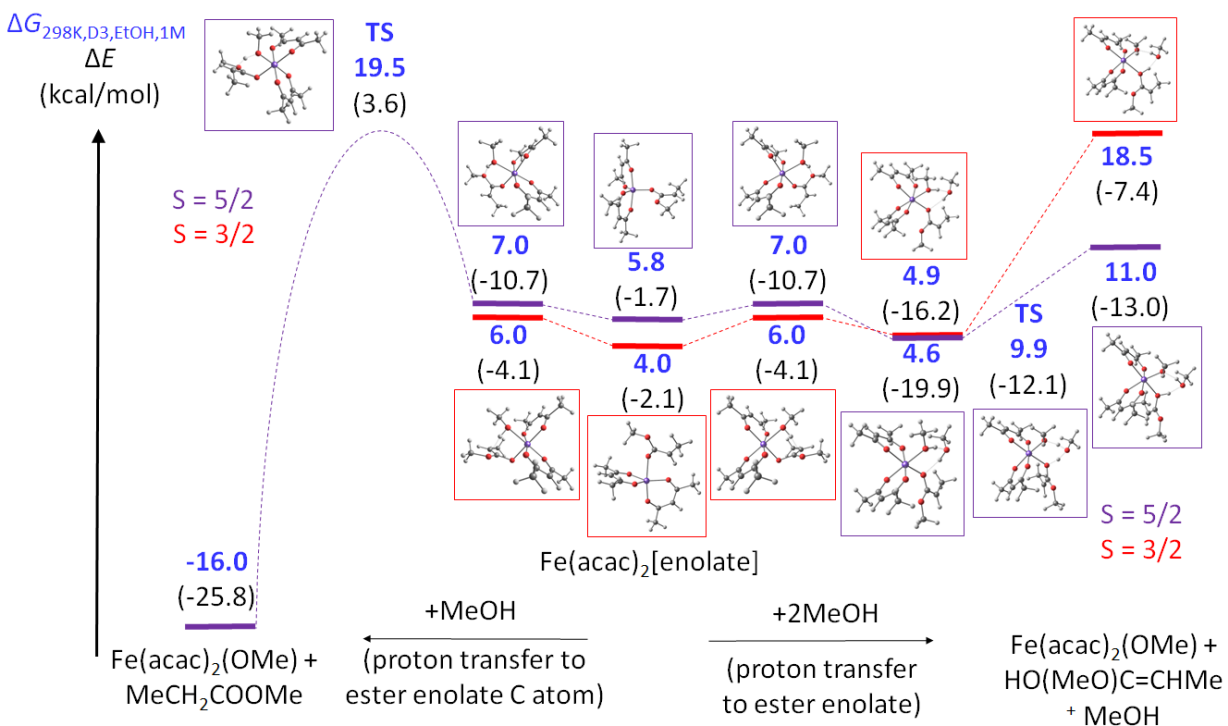

### Observations:

1. The O-bound enolate Fe<sup>III</sup> complex, like the C-bound one, is more stable in the quartet state, even though [(acac)<sub>2</sub>Fe<sup>III</sup>(OMe)] prefers a sextet state (see section N). The possible reason is that the  $\pi$  delocalization of the donor O lone pair makes this donor “softer” than the O donor of methoxide. This idea seems to agree with the observation that the quartet-sextet gap is reduced upon partial disruption of this  $\pi$  delocalization by introduction of one and then two H-bonded MeOH molecules. The final conversion to the enol-bonded methoxide complex, where the enol O donor atom is much less longer involved in the  $\pi$ -delocalized system, reverts this energy trend to yield a more stable sextet state for the [(acac)<sub>2</sub>Fe<sup>III</sup>(OMe)(HOC(OMe)=CHMe)] product at 11.0 kcal/mol relative to [Fe<sup>II</sup>(acac)<sub>2</sub>] + MeOH + acrylate radical, whereas the corresponding quartet product is located at 18.5 kcal/mol.
2. The transition state for the intramolecular proton transfer in the sextet state is found at a barely higher gas-phase electronic energy (-12.1 kcal/mol) than that of the final product (-13.0 kcal/mol). However, the thermal and solvation correction actually yield a lower energy for the TS (9.9 kcal/mol) than for final product (11.0 kcal/mol). This phenomenon is related to the inevitable problem that the stationary points (local minima and transition states) can only be optimized on the electronic energy surface; they are only approximations of the real stationary points. We can only conclude that the proton transfer process occurs with a very small overbarrier relative to the thermodynamic energy difference between alcohol-enolate and alcoholate-enol.
3. Given the high energy of the final product of proton transfer, the methoxide-enol complex, in the quartet state, the transition state leading to this product, which would necessarily have even higher energy, was not optimized.

**Cartesian coordinates and energies (gas-phase E and D3-corrected G in EtOH at 298 K, in hartrees) of the optimized geometries**

**[Fe(acac)<sub>2</sub>(OC(OMe)=CHMe)(MeOH)] S = 3/2**

**E = -1235.65542687**

**G<sub>298K,D3,EtOH,1M</sub> = -1235.655427**

**<S<sup>2</sup>> = 4.638**

|    |              |              |              |
|----|--------------|--------------|--------------|
| 26 | 0.296154000  | 0.073753000  | 0.075442000  |
| 8  | -0.857697000 | 1.505879000  | 0.685648000  |
| 6  | -0.754612000 | 2.766569000  | 0.450153000  |
| 6  | -1.789600000 | 3.613784000  | 1.146591000  |
| 8  | 1.072252000  | -1.467584000 | -0.862793000 |
| 6  | 2.158805000  | -2.095956000 | -0.615284000 |
| 6  | 3.007273000  | -1.853489000 | 0.471930000  |
| 6  | 2.790575000  | -0.849754000 | 1.439409000  |
| 8  | 1.791905000  | -0.067053000 | 1.458850000  |
| 6  | 2.507047000  | -3.175288000 | -1.611711000 |
| 6  | 3.801573000  | -0.660758000 | 2.547050000  |
| 8  | 1.371188000  | 1.392946000  | -0.972947000 |
| 6  | 1.225525000  | 2.647034000  | -1.028717000 |
| 6  | 2.232968000  | 3.393752000  | -1.871334000 |
| 6  | 0.204138000  | 3.366250000  | -0.365232000 |
| 1  | 3.239806000  | 3.203927000  | -1.480670000 |
| 1  | 1.685905000  | -3.900268000 | -1.665750000 |
| 1  | 2.605828000  | -2.726651000 | -2.607640000 |
| 1  | 2.051477000  | 4.472141000  | -1.890140000 |
| 1  | 3.433929000  | -3.698468000 | -1.359871000 |
| 1  | 2.207164000  | 3.003482000  | -2.895558000 |
| 1  | 0.175468000  | 4.445026000  | -0.481886000 |
| 1  | 3.899888000  | -2.464523000 | 0.564265000  |
| 1  | -1.671273000 | 3.506350000  | 2.231893000  |
| 1  | 4.630448000  | -1.372089000 | 2.488461000  |
| 1  | -1.713854000 | 4.671954000  | 0.881244000  |
| 1  | 4.199763000  | 0.360118000  | 2.500834000  |
| 1  | -2.791289000 | 3.243898000  | 0.897917000  |
| 1  | 3.303029000  | -0.766192000 | 3.518062000  |
| 8  | -0.851171000 | -1.244955000 | 1.266461000  |
| 6  | -2.133268000 | -1.539753000 | 0.595809000  |
| 6  | -3.392040000 | -1.046106000 | 0.958861000  |
| 8  | -1.989272000 | -2.408692000 | -0.465835000 |
| 6  | -3.225406000 | -2.859897000 | -1.030291000 |
| 1  | -3.810267000 | -2.026164000 | -1.434205000 |
| 1  | -2.951172000 | -3.556568000 | -1.826017000 |
| 1  | -3.831253000 | -3.367891000 | -0.272322000 |
| 8  | -1.022272000 | -0.116682000 | -1.828998000 |
| 1  | -1.215147000 | -1.066438000 | -1.741197000 |
| 6  | -2.234087000 | 0.600778000  | -2.035087000 |
| 1  | -1.965982000 | 1.658179000  | -2.110238000 |
| 1  | -2.713328000 | 0.296316000  | -2.976640000 |
| 1  | -2.939639000 | 0.472667000  | -1.203380000 |

1 -4.274165000 -1.374626000 0.429400000

6 -3.518843000 -0.034650000 2.113191000

1 -4.534927000 -0.023037000 2.523734000

1 -2.834105000 -0.277655000 2.933672000

1 -3.286062000 0.982961000 1.779438000

**[Fe(acac)<sub>2</sub>(OC(OMe)=CHMe)(MeOH)] S = 5/2**

**E = -1235.66591872**

**G<sub>298K,D3,EtOH,1M</sub> = -1235.432612**

**<S<sup>2</sup>> = 8.770**

|    |              |              |              |
|----|--------------|--------------|--------------|
| 26 | 0.158902000  | -0.026367000 | -0.282937000 |
| 8  | -0.305927000 | 1.639440000  | 0.830163000  |
| 6  | 0.503791000  | 2.498425000  | 1.306002000  |
| 6  | -0.049478000 | 3.381251000  | 2.400458000  |
| 8  | 0.769272000  | -1.566918000 | -1.411204000 |
| 6  | 1.445550000  | -2.591054000 | -1.080644000 |
| 6  | 1.929105000  | -2.849617000 | 0.215270000  |
| 6  | 1.720244000  | -1.996223000 | 1.308451000  |
| 8  | 1.079780000  | -0.893273000 | 1.266087000  |
| 6  | 1.723504000  | -3.576554000 | -2.190443000 |
| 6  | 2.276308000  | -2.365848000 | 2.662802000  |
| 8  | 1.832461000  | 1.010249000  | -0.811995000 |
| 6  | 2.413713000  | 1.941258000  | -0.164503000 |
| 6  | 3.827874000  | 2.251830000  | -0.596476000 |
| 6  | 1.832312000  | 2.677003000  | 0.880825000  |
| 1  | 4.451690000  | 1.361518000  | -0.449692000 |
| 1  | 0.771743000  | -3.932683000 | -2.602840000 |
| 1  | 2.252700000  | -3.064503000 | -3.002986000 |
| 1  | 4.264700000  | 3.090585000  | -0.046744000 |
| 1  | 2.315098000  | -4.433729000 | -1.856424000 |
| 1  | 3.840844000  | 2.475235000  | -1.670022000 |
| 1  | 2.425994000  | 3.450753000  | 1.358194000  |
| 1  | 2.495472000  | -3.761398000 | 0.378226000  |
| 1  | -0.327438000 | 2.754536000  | 3.256797000  |
| 1  | 2.825708000  | -3.311484000 | 2.650420000  |
| 1  | 0.660971000  | 4.144838000  | 2.730453000  |
| 1  | 2.939983000  | -1.565765000 | 3.012265000  |
| 1  | -0.967907000 | 3.865950000  | 2.048555000  |
| 1  | 1.452875000  | -2.435620000 | 3.383875000  |
| 8  | -1.578892000 | -0.768423000 | 0.105660000  |
| 6  | -2.830039000 | -0.480846000 | 0.136064000  |
| 6  | -3.773319000 | -1.171243000 | 0.849559000  |
| 8  | -3.145923000 | 0.612114000  | -0.661398000 |
| 6  | -4.498685000 | 1.021626000  | -0.759474000 |
| 1  | -4.889386000 | 1.329470000  | 0.219699000  |
| 1  | -4.514159000 | 1.878252000  | -1.438746000 |
| 1  | -5.130619000 | 0.220749000  | -1.167735000 |

|   |              |              |              |
|---|--------------|--------------|--------------|
| 8 | -0.81464000  | 0.894031000  | -2.031122000 |
| 1 | -1.743715000 | 0.898311000  | -1.712699000 |
| 6 | -0.451587000 | 2.197364000  | -2.474212000 |
| 1 | 0.590575000  | 2.147030000  | -2.795525000 |
| 1 | -1.077294000 | 2.500297000  | -3.324710000 |
| 1 | -0.538761000 | 2.936448000  | -1.666844000 |
| 1 | -4.811630000 | -0.854430000 | 0.818411000  |
| 6 | -3.421188000 | -2.345817000 | 1.699565000  |
| 1 | -3.989560000 | -3.241175000 | 1.406285000  |
| 1 | -2.354206000 | -2.572290000 | 1.619252000  |
| 1 | -3.652821000 | -2.162455000 | 2.759903000  |

|   |              |              |              |
|---|--------------|--------------|--------------|
| 1 | 4.022976000  | -2.771605000 | 0.353566000  |
| 8 | 0.986864000  | -0.564160000 | -1.682711000 |
| 1 | 2.095880000  | -0.590325000 | -1.332096000 |
| 6 | 0.607363000  | -1.522220000 | -2.655321000 |
| 1 | -0.342432000 | -1.211641000 | -3.100904000 |
| 1 | 1.376661000  | -1.557648000 | -3.437997000 |
| 1 | 0.490440000  | -2.518611000 | -2.207774000 |
| 1 | 4.174000000  | -0.787685000 | -0.783082000 |
| 6 | 3.383196000  | 1.239818000  | -1.185466000 |
| 1 | 3.674631000  | 1.208100000  | -2.242150000 |
| 1 | 2.417424000  | 1.750102000  | -1.121520000 |
| 1 | 4.132279000  | 1.847649000  | -0.656549000 |

**Intramolecular proton transfer to C, TS S = 5/2**

**E = -1235.64322319**

**G<sub>298K,D3,EtOH,1M</sub> = -1235.412578**

**<S<sup>2</sup>> = 8.759**

|    |              |              |              |
|----|--------------|--------------|--------------|
| 26 | -0.138803000 | 0.052729000  | -0.277127000 |
| 8  | -0.393664000 | -1.928939000 | 0.348534000  |
| 6  | -1.543738000 | -2.423944000 | 0.535034000  |
| 6  | -1.612493000 | -3.632709000 | 1.439752000  |
| 8  | 0.031162000  | 2.010239000  | -0.883522000 |
| 6  | -0.192178000 | 3.023619000  | -0.154355000 |
| 6  | -0.772639000 | 2.973596000  | 1.129468000  |
| 6  | -1.229626000 | 1.795418000  | 1.723967000  |
| 8  | -1.173064000 | 0.624761000  | 1.206930000  |
| 6  | 0.194437000  | 4.361142000  | -0.740487000 |
| 6  | -1.883318000 | 1.836694000  | 3.082615000  |
| 8  | -1.747932000 | -0.196911000 | -1.352576000 |
| 6  | -2.762055000 | -0.892544000 | -0.984809000 |
| 6  | -4.056288000 | -0.527090000 | -1.669593000 |
| 6  | -2.732033000 | -1.938085000 | -0.059009000 |
| 1  | -4.319938000 | 0.506943000  | -1.415235000 |
| 1  | 1.279962000  | 4.384722000  | -0.897305000 |
| 1  | -0.274304000 | 4.473157000  | -1.724987000 |
| 1  | -4.880182000 | -1.188901000 | -1.387653000 |
| 1  | -0.091793000 | 5.202300000  | -0.102621000 |
| 1  | -3.917944000 | -0.563076000 | -2.756707000 |
| 1  | -3.663092000 | -2.452514000 | 0.158819000  |
| 1  | -0.911227000 | 3.903713000  | 1.671204000  |
| 1  | -1.293107000 | -3.338324000 | 2.447069000  |
| 1  | -1.986860000 | 2.856864000  | 3.462315000  |
| 1  | -2.614344000 | -4.068795000 | 1.493713000  |
| 1  | -2.871371000 | 1.365093000  | 3.028986000  |
| 1  | -0.902625000 | -4.390694000 | 1.088746000  |
| 1  | -1.281193000 | 1.248807000  | 3.786030000  |
| 8  | 1.501943000  | 0.232948000  | 0.877045000  |
| 6  | 2.564087000  | -0.397223000 | 0.574235000  |
| 6  | 3.297576000  | -0.163229000 | -0.614886000 |
| 8  | 2.843055000  | -1.415289000 | 1.417906000  |
| 6  | 4.048190000  | -2.148914000 | 1.258009000  |
| 1  | 4.923958000  | -1.487981000 | 1.218984000  |
| 1  | 4.121291000  | -2.797749000 | 2.134696000  |

**[Fe(acac)<sub>2</sub>(OC(OMe)=CHMe)(MeOH)···MeOH]**

**S = 3/2**

**E = -1351.28449409**

**G<sub>298K,D3,EtOH,1M</sub> = -1351.022758**

**<S<sup>2</sup>> = 4.489**

|    |              |              |              |
|----|--------------|--------------|--------------|
| 26 | 0.298970000  | -0.009367000 | 0.277550000  |
| 8  | 0.885335000  | -1.478156000 | -0.828675000 |
| 6  | 2.027678000  | -1.690716000 | -1.522841000 |
| 6  | 2.055896000  | -2.747965000 | -2.602200000 |
| 8  | -0.002180000 | 1.531752000  | 1.450520000  |
| 6  | -0.008793000 | 2.799082000  | 1.185997000  |
| 6  | 0.126229000  | 3.329400000  | -0.108289000 |
| 6  | 0.253275000  | 2.541058000  | -1.264280000 |
| 8  | 0.284052000  | 1.283929000  | -1.300032000 |
| 6  | -0.175807000 | 3.733573000  | 2.360647000  |
| 6  | 0.357451000  | 3.211324000  | -2.614485000 |
| 8  | 2.235115000  | 0.319867000  | 0.529240000  |
| 6  | 3.277841000  | 0.001556000  | -0.224477000 |
| 6  | 4.600513000  | 0.681576000  | 0.046004000  |
| 6  | 3.185775000  | -0.941686000 | -1.263563000 |
| 1  | 4.474240000  | 1.766694000  | -0.050743000 |
| 1  | -1.107656000 | 3.489941000  | 2.884825000  |
| 1  | 0.642686000  | 3.568156000  | 3.071693000  |
| 1  | 5.394468000  | 0.349338000  | -0.629210000 |
| 1  | -0.189303000 | 4.787121000  | 2.066527000  |
| 1  | 4.904069000  | 0.487204000  | 1.081882000  |
| 1  | 4.071589000  | -1.142039000 | -1.858639000 |
| 1  | 0.113595000  | 4.409068000  | -0.223594000 |
| 1  | 1.254361000  | -2.547200000 | -3.322940000 |
| 1  | 0.327878000  | 4.302833000  | -2.548259000 |
| 1  | 3.013998000  | -2.789750000 | -3.128334000 |
| 1  | 1.291789000  | 2.904068000  | -3.099619000 |
| 1  | 1.850368000  | -3.730473000 | -2.158957000 |
| 1  | -0.462919000 | 2.865584000  | -3.254962000 |
| 8  | -1.654986000 | -0.719752000 | -0.082324000 |
| 6  | -2.774154000 | -0.108570000 | -0.327408000 |
| 6  | -3.867632000 | -0.732861000 | -0.878558000 |
| 8  | -2.748385000 | 1.207250000  | 0.012972000  |
| 6  | -3.871522000 | 2.008317000  | -0.296039000 |

|   |              |              |              |
|---|--------------|--------------|--------------|
| 1 | -4.760616000 | 1.697048000  | 0.271561000  |
| 1 | -3.600529000 | 3.028110000  | -0.011477000 |
| 1 | -4.103715000 | 1.978956000  | -1.370372000 |
| 8 | 0.320308000  | -1.331317000 | 2.183958000  |
| 1 | -0.284550000 | -2.118191000 | 2.065105000  |
| 6 | 1.458960000  | -1.658815000 | 2.963768000  |
| 1 | 2.097725000  | -0.773546000 | 2.997145000  |
| 1 | 1.158183000  | -1.929205000 | 3.985171000  |
| 1 | 2.030890000  | -2.488431000 | 2.523527000  |
| 1 | -4.786213000 | -0.169741000 | -1.012852000 |
| 6 | -3.858564000 | -2.164001000 | -1.304048000 |
| 1 | -2.835411000 | -2.520923000 | -1.463204000 |
| 1 | -4.335793000 | -2.826005000 | -0.563155000 |
| 1 | -4.410974000 | -2.298009000 | -2.243736000 |
| 1 | -1.673993000 | -2.402668000 | 0.826843000  |
| 8 | -1.430376000 | -3.124296000 | 1.452766000  |
| 6 | -0.900022000 | -4.205100000 | 0.695437000  |
| 1 | -1.688052000 | -4.707834000 | 0.116091000  |
| 1 | -0.110821000 | -3.866736000 | 0.010593000  |
| 1 | -0.482331000 | -4.931066000 | 1.401395000  |

**[Fe(acac)<sub>2</sub>(OMe)(HO(MeO)C=CHMe)···MeOH]**

**S = 3/2**

**E = -1351.27045376**

**G<sub>298K,D3,EtOH,1M</sub> = -1351.001117**

**<S<sup>2</sup>> = 3.808**

|    |              |              |              |
|----|--------------|--------------|--------------|
| 26 | 0.516506000  | -0.047289000 | 0.363256000  |
| 8  | 0.928299000  | -1.555507000 | -0.765820000 |
| 6  | 2.033471000  | -1.814272000 | -1.353900000 |
| 6  | 1.969553000  | -2.965709000 | -2.328428000 |
| 8  | -0.019773000 | 1.419835000  | 1.461673000  |
| 6  | -0.089906000 | 2.647227000  | 1.104767000  |
| 6  | 0.104879000  | 3.126235000  | -0.193848000 |
| 6  | 0.299142000  | 2.278375000  | -1.295578000 |
| 8  | 0.385544000  | 1.009448000  | -1.237984000 |
| 6  | -0.437261000 | 3.600130000  | 2.218367000  |
| 6  | 0.392563000  | 2.857614000  | -2.684450000 |
| 8  | 2.522997000  | 0.406576000  | 0.491278000  |
| 6  | 3.435081000  | -0.092662000 | -0.236228000 |
| 6  | 4.814081000  | 0.504339000  | -0.068837000 |
| 6  | 3.247388000  | -1.145228000 | -1.154091000 |
| 1  | 4.765947000  | 1.584805000  | -0.249152000 |
| 1  | -1.425190000 | 3.337735000  | 2.615820000  |
| 1  | 0.281912000  | 3.481466000  | 3.037059000  |
| 1  | 5.553679000  | 0.058086000  | -0.739909000 |
| 1  | -0.445712000 | 4.642756000  | 1.889379000  |
| 1  | 5.142913000  | 0.367297000  | 0.968545000  |
| 1  | 4.107410000  | -1.484189000 | -1.723251000 |
| 1  | 0.031852000  | 4.194807000  | -0.368017000 |
| 1  | 1.185880000  | -2.770388000 | -3.069713000 |
| 1  | 0.329646000  | 3.949223000  | -2.688103000 |
| 1  | 2.921273000  | -3.131406000 | -2.840986000 |

|   |              |              |              |
|---|--------------|--------------|--------------|
| 1 | 1.338356000  | 2.545824000  | -3.142819000 |
| 1 | 1.688198000  | -3.881314000 | -1.793957000 |
| 1 | -0.414482000 | 2.445491000  | -3.301620000 |
| 8 | -1.733445000 | -0.687324000 | 0.009507000  |
| 6 | -2.867512000 | -0.083317000 | -0.400069000 |
| 6 | -3.971060000 | -0.716837000 | -0.839914000 |
| 8 | -2.693371000 | 1.261753000  | -0.316644000 |
| 6 | -3.699865000 | 2.075178000  | -0.880130000 |
| 1 | -4.642024000 | 2.002192000  | -0.316663000 |
| 1 | -3.326724000 | 3.101464000  | -0.826771000 |
| 1 | -3.893121000 | 1.802417000  | -1.927997000 |
| 8 | 0.504968000  | -1.149729000 | 1.822805000  |
| 1 | -0.737397000 | -2.162307000 | 1.836413000  |
| 6 | 1.066243000  | -0.695068000 | 3.028459000  |
| 1 | 0.495125000  | 0.141371000  | 3.457762000  |
| 1 | 1.064618000  | -1.528861000 | 3.746974000  |
| 1 | 2.104623000  | -0.365437000 | 2.877750000  |
| 1 | -4.847549000 | -0.122217000 | -1.080021000 |
| 6 | -4.077479000 | -2.204127000 | -0.995362000 |
| 1 | -3.087472000 | -2.671649000 | -1.047813000 |
| 1 | -4.625181000 | -2.681980000 | -0.168700000 |
| 1 | -4.608994000 | -2.463736000 | -1.920781000 |
| 1 | -1.883019000 | -1.532229000 | 0.554082000  |
| 8 | -1.573471000 | -2.664110000 | 1.590835000  |
| 6 | -1.184662000 | -3.907749000 | 1.028388000  |
| 1 | -2.085846000 | -4.411408000 | 0.661816000  |
| 1 | -0.483818000 | -3.775797000 | 0.191666000  |
| 1 | -0.715989000 | -4.554819000 | 1.784273000  |

**[Fe(acac)<sub>2</sub>(OC(OMe)=CHMe)(MeOH)···MeOH]**

**S = 5/2**

**E = -1351.29035085**

**G<sub>298K,D3,EtOH,1M</sub> = -1351.023308**

**<S<sup>2</sup>> = 8.771**

|    |              |              |              |
|----|--------------|--------------|--------------|
| 26 | -0.266472000 | 0.016658000  | -0.301463000 |
| 8  | -1.119406000 | -1.487842000 | 0.802808000  |
| 6  | -2.239815000 | -1.476335000 | 1.411331000  |
| 6  | -2.431570000 | -2.561445000 | 2.445426000  |
| 8  | 0.274109000  | 1.573653000  | -1.426432000 |
| 6  | 0.444086000  | 2.788262000  | -1.089307000 |
| 6  | 0.365102000  | 3.280154000  | 0.224636000  |
| 6  | 0.111908000  | 2.471872000  | 1.345579000  |
| 8  | -0.096685000 | 1.216875000  | 1.309640000  |
| 6  | 0.757542000  | 3.736276000  | -2.222438000 |
| 6  | 0.082174000  | 3.095662000  | 2.721502000  |
| 8  | -2.213562000 | 0.649785000  | -0.568020000 |
| 6  | -3.221795000 | 0.424947000  | 0.173073000  |
| 6  | -4.432329000 | 1.293899000  | -0.081054000 |
| 6  | -3.277934000 | -0.562625000 | 1.172789000  |
| 1  | -4.157200000 | 2.345869000  | 0.061952000  |
| 1  | 1.653969000  | 3.385567000  | -2.747684000 |
| 1  | -0.065298000 | 3.715745000  | -2.947277000 |

|   |              |              |              |
|---|--------------|--------------|--------------|
| 1 | -5.274920000 | 1.049528000  | 0.572386000  |
| 1 | 0.913650000  | 4.764938000  | -1.884594000 |
| 1 | -4.744520000 | 1.185518000  | -1.126883000 |
| 1 | -4.191854000 | -0.660443000 | 1.750807000  |
| 1 | 0.526680000  | 4.341919000  | 0.384907000  |
| 1 | -1.620729000 | -2.503954000 | 3.181266000  |
| 1 | 0.264894000  | 4.174016000  | 2.701056000  |
| 1 | -3.393884000 | -2.489504000 | 2.960500000  |
| 1 | -0.893075000 | 2.903274000  | 3.184779000  |
| 1 | -2.358672000 | -3.544569000 | 1.963574000  |
| 1 | 0.836536000  | 2.613050000  | 3.354571000  |
| 8 | 1.451980000  | -0.913990000 | 0.025328000  |
| 6 | 2.641747000  | -0.475988000 | 0.305964000  |
| 6 | 3.628942000  | -1.268891000 | 0.840710000  |
| 8 | 2.805106000  | 0.842987000  | 0.020443000  |
| 6 | 4.024366000  | 1.465737000  | 0.372892000  |
| 1 | 4.869665000  | 1.055839000  | -0.198947000 |
| 1 | 3.902751000  | 2.523988000  | 0.128549000  |
| 1 | 4.234078000  | 1.361240000  | 1.447168000  |
| 8 | -0.430162000 | -1.118184000 | -2.111646000 |
| 1 | 0.057018000  | -1.986182000 | -2.020083000 |
| 6 | -1.591596000 | -1.251445000 | -2.914890000 |
| 1 | -2.099884000 | -0.284763000 | -2.917271000 |
| 1 | -1.316280000 | -1.520316000 | -3.943846000 |
| 1 | -2.280315000 | -2.009619000 | -2.514870000 |
| 1 | 4.615055000  | -0.845899000 | 1.006805000  |
| 6 | 3.413712000  | -2.700471000 | 1.206140000  |
| 1 | 2.348470000  | -2.916528000 | 1.340849000  |
| 1 | 3.804836000  | -3.392710000 | 0.442761000  |
| 1 | 3.927865000  | -2.948003000 | 2.144491000  |
| 1 | 1.374421000  | -2.511822000 | -0.781970000 |
| 8 | 1.041799000  | -3.166602000 | -1.439618000 |
| 6 | 0.354416000  | -4.191774000 | -0.732874000 |
| 1 | 1.055746000  | -4.822730000 | -0.167716000 |
| 1 | -0.389951000 | -3.773754000 | -0.041848000 |
| 1 | -0.149963000 | -4.823250000 | -1.472272000 |

**Intramolecular proton transfer to O, TS S = 5/2**

**E = -1351.2779576**

**G<sub>298K,D3,EtOH,IM</sub> = -1351.015296**

**<S<sup>2</sup>> = 8.758**

|    |              |              |              |
|----|--------------|--------------|--------------|
| 26 | 0.485983000  | -0.052784000 | -0.391632000 |
| 8  | 1.596070000  | 1.201083000  | 0.742818000  |
| 6  | 2.752450000  | 1.017615000  | 1.243947000  |
| 6  | 3.227524000  | 2.090467000  | 2.193270000  |
| 8  | -0.592942000 | -1.444312000 | -1.378914000 |
| 6  | -1.361157000 | -2.359963000 | -0.938138000 |
| 6  | -1.530597000 | -2.676831000 | 0.418650000  |
| 6  | -0.861396000 | -2.003443000 | 1.453527000  |
| 8  | -0.034350000 | -1.051052000 | 1.278814000  |
| 6  | -2.120722000 | -3.130744000 | -1.989120000 |
| 6  | -1.113725000 | -2.393809000 | 2.888155000  |

|   |              |              |              |
|---|--------------|--------------|--------------|
| 8 | 2.161386000  | -1.164800000 | -0.597446000 |
| 6 | 3.257112000  | -1.091775000 | 0.049851000  |
| 6 | 4.248894000  | -2.194663000 | -0.230430000 |
| 6 | 3.585781000  | -0.078317000 | 0.963833000  |
| 1 | 3.792910000  | -3.160481000 | 0.018797000  |
| 1 | -2.786538000 | -2.441819000 | -2.523113000 |
| 1 | -1.415027000 | -3.532875000 | -2.725391000 |
| 1 | 5.179071000  | -2.078742000 | 0.332844000  |
| 1 | -2.712262000 | -3.948617000 | -1.567868000 |
| 1 | 4.474907000  | -2.214855000 | -1.303258000 |
| 1 | 4.554687000  | -0.122663000 | 1.451210000  |
| 1 | -2.208158000 | -3.483682000 | 0.679933000  |
| 1 | 2.522615000  | 2.168383000  | 3.029701000  |
| 1 | -1.727940000 | -3.294380000 | 2.979135000  |
| 1 | 4.230588000  | 1.895818000  | 2.582976000  |
| 1 | -0.156932000 | -2.547932000 | 3.399572000  |
| 1 | 3.221594000  | 3.058437000  | 1.677943000  |
| 1 | -1.621224000 | -1.561289000 | 3.391043000  |
| 8 | -1.123390000 | 1.274200000  | -0.053500000 |
| 6 | -2.289588000 | 1.046848000  | 0.572952000  |
| 6 | -2.493785000 | 1.286806000  | 1.883648000  |
| 8 | -3.213598000 | 0.569190000  | -0.312084000 |
| 6 | -4.514412000 | 0.332984000  | 0.182270000  |
| 1 | -4.957987000 | 1.248577000  | 0.601407000  |
| 1 | -5.112377000 | -0.003534000 | -0.669138000 |
| 1 | -4.513109000 | -0.447583000 | 0.957801000  |
| 8 | 0.774563000  | 0.886338000  | -2.083654000 |
| 1 | -0.061506000 | 1.896299000  | -2.187747000 |
| 6 | 1.105058000  | 0.217660000  | -3.279915000 |
| 1 | 0.308229000  | -0.479366000 | -3.578754000 |
| 1 | 1.262852000  | 0.947533000  | -4.087719000 |
| 1 | 2.029268000  | -0.360105000 | -3.143503000 |
| 1 | -3.469783000 | 1.072067000  | 2.310924000  |
| 6 | -1.440140000 | 1.849803000  | 2.786964000  |
| 1 | -0.503923000 | 2.000125000  | 2.241173000  |
| 1 | -1.751233000 | 2.813391000  | 3.218819000  |
| 1 | -1.227738000 | 1.180280000  | 3.633387000  |
| 1 | -1.151652000 | 2.030909000  | -0.987797000 |
| 8 | -0.838932000 | 2.659395000  | -1.966253000 |
| 6 | -0.205299000 | 3.872143000  | -1.564832000 |
| 1 | -0.970951000 | 4.571586000  | -1.211549000 |
| 1 | 0.522253000  | 3.697813000  | -0.760251000 |
| 1 | 0.307382000  | 4.320068000  | -2.424190000 |

**[Fe(acac)<sub>2</sub>(OMe)(HO(MeO)C=CHMe)···MeOH]**

**S = 5/2**

**E = -1351.28013368**

**G<sub>298K,D3,EtOH,IM</sub> = -1351.012992**

**<S<sup>2</sup>> = 8.758**

|    |              |              |              |
|----|--------------|--------------|--------------|
| 26 | -0.527105000 | 0.058744000  | -0.443500000 |
| 8  | -1.534885000 | -1.235673000 | 0.743357000  |
| 6  | -2.690719000 | -1.096269000 | 1.257820000  |

|   |              |              |              |   |              |              |              |
|---|--------------|--------------|--------------|---|--------------|--------------|--------------|
| 6 | -3.105296000 | -2.174837000 | 2.229128000  | 8 | 1.206639000  | -1.264406000 | 0.005558000  |
| 8 | 0.559651000  | 1.461310000  | -1.411357000 | 6 | 2.386564000  | -0.984133000 | 0.614123000  |
| 6 | 1.266854000  | 2.427245000  | -0.973510000 | 6 | 2.572347000  | -1.127496000 | 1.937383000  |
| 6 | 1.395776000  | 2.773414000  | 0.379395000  | 8 | 3.294207000  | -0.558133000 | -0.303783000 |
| 6 | 0.748765000  | 2.075238000  | 1.413854000  | 6 | 4.600093000  | -0.291551000 | 0.165617000  |
| 8 | -0.013445000 | 1.071935000  | 1.241028000  | 1 | 5.040208000  | -1.176866000 | 0.647753000  |
| 6 | 1.996746000  | 3.224420000  | -2.026268000 | 1 | 5.192815000  | -0.019841000 | -0.711599000 |
| 6 | 0.951640000  | 2.506288000  | 2.845665000  | 1 | 4.603257000  | 0.543405000  | 0.881696000  |
| 8 | -2.234337000 | 1.101796000  | -0.618398000 | 8 | -0.729439000 | -0.886719000 | -2.071744000 |
| 6 | -3.314274000 | 0.977448000  | 0.049560000  | 1 | 0.236570000  | -2.119304000 | -2.181453000 |
| 6 | -4.363680000 | 2.027058000  | -0.224289000 | 6 | -1.062828000 | -0.269279000 | -3.288586000 |
| 6 | -3.578050000 | -0.042493000 | 0.976097000  | 1 | -2.039014000 | 0.233888000  | -3.213156000 |
| 1 | -3.951052000 | 3.017206000  | 0.003973000  | 1 | -0.313213000 | 0.488314000  | -3.564565000 |
| 1 | 2.688000000  | 2.561725000  | -2.560967000 | 1 | -1.118416000 | -1.020110000 | -4.091582000 |
| 1 | 1.275265000  | 3.597773000  | -2.762667000 | 1 | 3.534883000  | -0.849980000 | 2.359455000  |
| 1 | -5.276317000 | 1.872859000  | 0.358075000  | 6 | 1.522722000  | -1.655771000 | 2.866064000  |
| 1 | 2.555535000  | 4.066251000  | -1.607316000 | 1 | 0.594136000  | -1.861382000 | 2.325991000  |
| 1 | -4.610332000 | 2.021655000  | -1.292759000 | 1 | 1.854646000  | -2.581389000 | 3.359845000  |
| 1 | -4.540926000 | -0.038840000 | 1.477182000  | 1 | 1.290628000  | -0.937501000 | 3.665196000  |
| 1 | 2.021882000  | 3.621355000  | 0.639150000  | 1 | 1.296554000  | -1.931272000 | -0.785492000 |
| 1 | -2.392661000 | -2.201589000 | 3.062311000  | 8 | 0.944789000  | -2.804027000 | -1.943770000 |
| 1 | 1.521107000  | 3.436393000  | 2.930838000  | 6 | 0.281456000  | -3.972897000 | -1.478144000 |
| 1 | -4.114441000 | -2.024726000 | 2.622795000  | 1 | 1.041547000  | -4.671469000 | -1.111960000 |
| 1 | -0.023049000 | 2.627277000  | 3.331806000  | 1 | -0.417598000 | -3.747300000 | -0.659923000 |
| 1 | -3.052803000 | -3.150196000 | 1.730839000  | 1 | -0.270705000 | -4.460746000 | -2.293328000 |
| 1 | 1.484091000  | 1.710091000  | 3.380299000  |   |              |              |              |

## 2.R Bond strength calculations (all energies are in hartrees)

### R1. Fe-H bond in FeH(acac)<sub>2</sub>

| H atom                                      | Fe(acac) <sub>2</sub> (S = 2)                 | FeH(acac) <sub>2</sub> (S = 3/2)              |
|---------------------------------------------|-----------------------------------------------|-----------------------------------------------|
| E = -0.499935773744                         | E = -813.288650469                            | E = -813.822212133                            |
| E-D3 = -0.499589719405                      | E-D3 = -813.345258118                         | E-D3 = -813.875909871                         |
| H = -0.497575                               | H = -813.045524                               | H = -813.570726                               |
| G <sub>298K, gas, 1atm</sub> = -0.510590    | G <sub>298K, gas, 1atm</sub> = -813.112200    | G <sub>298K, gas, 1atm</sub> = -813.640705    |
| G <sub>298K, D3, EtOH, 1M</sub> = -0.507136 | G <sub>298K, D3, EtOH, 1M</sub> = -813.165701 | G <sub>298K, D3, EtOH, 1M</sub> = -813.691295 |

### R2. C-H bond in MeCH<sub>2</sub>(COOMe)

| H atom                                      | MeCH <sup>•</sup> (COOMe)                     | MeCH <sub>2</sub> COOMe                       |
|---------------------------------------------|-----------------------------------------------|-----------------------------------------------|
| E = -0.499935773744                         | E = -306.750548945                            | E = -307.405250263                            |
| E-D3 = -0.499589719405                      | E-D3 = -306.765994664                         | E-D3 = -307.422234539                         |
| H = -0.497575                               | H = -306.637742                               | H = -307.278578                               |
| G <sub>298K, gas, 1atm</sub> = -0.510590    | G <sub>298K, gas, 1atm</sub> = -306.678841    | G <sub>298K, gas, 1atm</sub> = -307.319028    |
| G <sub>298K, D3, EtOH, 1M</sub> = -0.507136 | G <sub>298K, D3, EtOH, 1M</sub> = -306.691179 | G <sub>298K, D3, EtOH, 1M</sub> = -307.332905 |

### R3. O-H bond in Fe(acac)<sub>2</sub>(EtOH)<sub>2</sub>

| H atom                                      | Fe(acac) <sub>2</sub> (OEt)(EtOH)<br>S = 5/2      | Fe(acac) <sub>2</sub> (EtOH) <sub>2</sub><br>S = 2 |
|---------------------------------------------|---------------------------------------------------|----------------------------------------------------|
| E = -0.499935773744                         | E = -1122.46004922                                | E = -1123.08835008                                 |
| E-D3 = -0.499589719405                      | E-D3 = -1122.54590513                             | E-D3 = -1123.17824487                              |
| H = -0.497575                               | H = -1122.054198                                  | H = -1122.669822                                   |
| G <sub>298K, gas, 1atm</sub> = -0.510590    | G <sub>298K, gas, 1atm</sub> = -1122.149460       | G <sub>298K, gas, 1atm</sub> = -1122.768300        |
| G <sub>298K, D3, EtOH, 1M</sub> = -0.507136 | G <sub>298K, D3, EtOH, 1M</sub> =<br>-1122.232209 | G <sub>298K, D3, EtOH, 1M</sub> =<br>-1122.855087  |

## 2.S Estimation of the expected steady-state concentration of the hydride complex

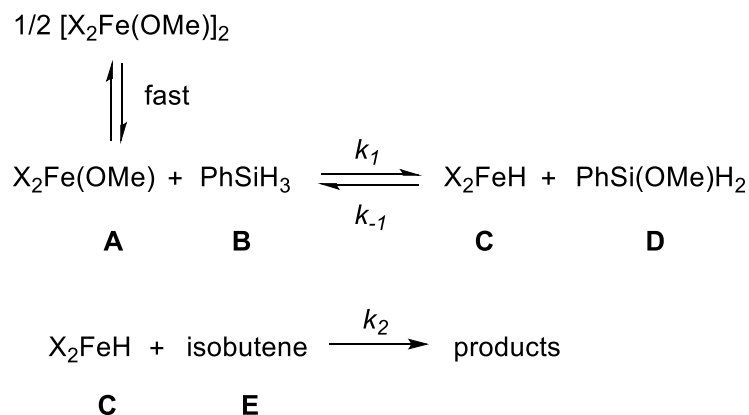

This yields the steady-state concentration of C as:

$$[C] = \frac{k_1[A][B]}{(k_{-1}[D] + k_2[E])}$$

The experimental conditions are  $[\text{Fe}]_{\text{total}} = 0.02 \text{ M}$ ,  $[\text{B}]_{\text{initial}} = 0.4 \text{ M}$ ,  $[\text{E}]_{\text{initial}} = 0.2 \text{ M}$ .

The computational barriers and rates (at RT) are:

$$\Delta G^\ddagger_1 = 24.9 \text{ kcal/mol} \rightarrow k_1 = 3.53 \cdot 10^{-6} \text{ s}^{-1} \text{ M}^{-1};$$

$$\Delta G^\ddagger_{-1} = 16.3 \text{ kcal/mol} \rightarrow k_{-1} = 7.07 \text{ s}^{-1} \text{ M}^{-1};$$

$$\Delta G^\ddagger_2 = 4.7 \text{ kcal/mol} \rightarrow k_2 = 2.2 \cdot 10^9 \text{ s}^{-1} \text{ M}^{-1}.$$

Since  $k_{-1}$  is much smaller than  $k_2$ , and  $[\text{D}]$  is smaller than  $[\text{E}]$ , this reduces to

$$[C] = \frac{k_1[A][B]}{k_2[E]}$$

Using the above numbers, and  $[\text{A}] < 0.02 \text{ M}$ , we calculate an upper limit for the concentration of the hydride complex as  $[\text{C}] < 6 \cdot 10^{-17} \text{ M}$ . Even though this value is rough (it is calculated for room temperature and using estimated numbers and is therefore only a rough estimation), it is evident that the steady-state concentration of the hydride is expected to be undetectably small.



## References for Supporting Information

1. Sueiras, J.; Okamura, W. H. *J. Am. Chem. Soc.* **1980**, *102*, 6255-6259.
2. Lo, J. C.; Kim, D.; Pan, C.-M.; Edwards, J. T.; Yabe, Y.; Gui, J.; Qin, T.; Gutiérrez, S.; Giacoboni, J.; Smith, M. W.; Holland, P. L.; Baran, P. S. *J. Am. Chem. Soc.* **2017**, *139*, 2484-2503.
3. Nicolini, C.; Reiff, W. M. *Inorg. Chem.* **1980**, *19*, 2676-2679.
4. Thordarson, P. *Chem. Soc. Rev.* **2011**, *40*, 1305-1323.
5. Frisch, M. J.; Trucks, G. W.; Schlegel, H. B.; Scuseria, G. E.; Robb, M. A.; Cheeseman, J. R.; Scalmani, G.; Barone, V.; Mennucci, B.; Petersson, G. A.; Nakatsuji, H.; Caricato, M.; Li, X.; Hratchian, H. P.; Izmaylov, A. F.; Bloino, J.; Zheng, G.; Sonnenberg, J. L.; Hada, M.; Ehara, M.; Toyota, K.; Fukuda, R.; Hasegawa, J.; Ishida, M.; Nakajima, T.; Honda, Y.; Kitao, O.; Nakai, H.; Vreven, T.; Montgomery, J., J. A.; Peralta, J. E.; Ogliaro, F.; Bearpark, M.; Heyd, J. J.; Brothers, E.; Kudin, K. N.; Staroverov, V. N.; Kobayashi, R.; Normand, J.; Raghavachari, K.; Rendell, A.; Burant, J. C.; Iyengar, S. S.; Tomasi, J.; Cossi, M.; Rega, N.; Millam, N. J.; Klene, M.; Knox, J. E.; Cross, J. B.; Bakken, V.; Adamo, C.; Jaramillo, J.; Gomperts, R.; Stratmann, R. E.; Yazyev, O.; Austin, A. J.; Cammi, R.; Pomelli, C.; Ochterski, J. W.; Martin, R. L.; Morokuma, K.; Zakrzewski, V. G.; Voth, G. A.; Salvador, P.; Dannenberg, J. J.; Dapprich, S.; Daniels, A. D.; Farkas, Ö.; Foresman, J. B.; Ortiz, J. V.; Cioslowski, J.; Fox, D. J., *Gaussian 09, Revision D.01*. Gaussian, Inc.: Wallingford CT, 2009.
6. Reiher, M., Theoretical study of the Fe(phen)<sub>2</sub>(NCS)<sub>2</sub> spin-crossover complex with reparametrized density functionals. *Inorg. Chem.* **2002**, *41*, 6928-6935.
7. Ehlers, A. W.; Böhme, M.; Dapprich, S.; Gobbi, A.; Hoellwarth, A.; Jonas, V.; Koehler, K. F.; Stegmann, R.; Veldkamp, A.; Frenking, G., A set of f-polarization functions for pseudopotential basis sets of the transition metals Sc-Cu, Y-Ag and La-Au. *Chem. Phys. Lett.* **1993**, *208*, 111-114.
8. Grimme, S.; Antony, J.; Ehrlich, S.; Krieg, H., A consistent and accurate ab initio parametrization of density functional dispersion correction (DFT-D) for the 94 elements H-Pu. *J. Chem. Phys.* **2010**, *132*, 154104.
9. Marenich, A. V.; Cramer, C. J.; Truhlar, D. G., Universal Solvation Model Based on Solute Electron Density and on a Continuum Model of the Solvent Defined by the Bulk Dielectric Constant and Atomic Surface Tensions. *J. Phys. Chem. B* **2009**, *113*, 6378-6396.
10. Bryantsev, V. S.; Diallo, M. S.; Goddard, W. A., III, Calculation of solvation free energies of charged solutes using mixed cluster/continuum models. *J. Phys. Chem. B* **2008**, *112*, 9709-9719.
